# Supplementary material for: Stereoselective construction of deoxy-cruciferane alkaloids by NHC-catalyzed intramolecular annulation of homoenolate with quinazolinone
Source: Royal Society of Chemistry journal article supplement (doi:10.1039/c9ob01243e), 2019-01-01

*Supporting Information for*

**Stereoselective Construction of Deoxy-Cruciferane Alkaloids by NHC-Catalyzed Intramolecular Annulation of Homoenolate with Quinazolinone**

Milind M. Ahire<sup>ab</sup>, Mahesh D. Pol<sup>a</sup>, Dattatry S. Kavale<sup>a</sup>, Rajesh G. Gonnade,<sup>bc</sup> and Santosh B. Mhaske<sup>\*ab</sup>

<sup>a</sup>Division of Organic Chemistry, CSIR-National Chemical Laboratory, Pune 411008, India

<sup>b</sup>Academy of Scientific and Innovative Research (AcSIR), Ghaziabad 201002, India

<sup>c</sup>Physical and Materials Chemistry Division, CSIR-National Chemical Laboratory, Pune 411008, India

E-mail: sb.mhaske@ncl.res.in

| <b>Sr. No.</b> | <b>Table of Contents</b>                                             | <b>Pages</b> |
|----------------|----------------------------------------------------------------------|--------------|
| 1.             | General Information.....                                             | S2           |
| 2.             | Experimental Section.....                                            | S3-S6        |
| 3.             | Characterization Data of Compounds.....                              | S7-S20       |
| 4.             | X-ray crystallographic data of deoxy-cruciferane <b>2a</b> .....     | S21          |
| 5.             | References.....                                                      | S22          |
| 6.             | Copies of HPLC Chromatograms.....                                    | S23-30       |
| 7.             | Copies of <sup>1</sup> H NMR, <sup>13</sup> C, DEPT NMR Spectra..... | S31-S86      |

## 1. General Information:

All reagents and solvents were used as received from commercial sources unless and otherwise noted. THF was freshly distilled over benzophenone-ketyl under an atmosphere of argon. Toluene was dried by distillation over sodium wire under argon atmosphere and stored over 4 Å molecular sieves. All experiments were performed under an argon atmosphere. Precoated plates (silica gel 60 PF254, 0.25 or 0.50 mm) were utilized for thin-layer chromatography (TLC). Column chromatographic purifications were carried out on flash silica-gel (240-400 mesh) or neutral alumina (70-230 mesh) using petroleum ether and ethyl acetate or DCM:MeOH as eluents. The  $^1\text{H}$ ,  $^{13}\text{C}$ , and distortionless enhancement by polarization transfer (DEPT)-NMR spectra were recorded on 200/400/500 and 100/125 MHz NMR spectrometers, respectively in  $\text{CDCl}_3$ . Chemical shifts are reported as  $\delta$  values from standard peaks. The multiplicities of signals are designated by the following abbreviations: s (singlet), d (doublet), t (triplet), q (quartet), quint. (quintet), m (multiplet). Coupling constants ( $J$ ) are reported in hertz. Optical rotations were measured with a P-2000 polarimeter at 589 nm. The enantiomeric ratio of deoxy-cruciferanes was determined by chiral HPLC analysis using Agilent technologies 1260 Infinity series. Single-crystal X-ray intensity data measurements of compound **2a** was carried out on Bruker D8 VENTURE Kappa Duo PHOTON II CPAD diffractometer equipped with Incoatech multilayer mirrors optics. The intensity measurements were carried out with Mo micro-focus sealed tube diffraction source ( $\text{CuK}_\alpha = 1.54178 \text{ \AA}$ ) at 100(2) K temperature. High-resolution mass spectrometry (HRMS) was performed on a time-of-flight (TOF)/quadrupole-TOF mass spectrometer.

## 2. Experimental section:

### [A] General Experimental Procedure for Aniline-esters **5a-h**.

All the reactions were performed on 1 g of *o*-bromoaniline. The esters **5a-h** were prepared by using the literature procedure.<sup>1</sup>

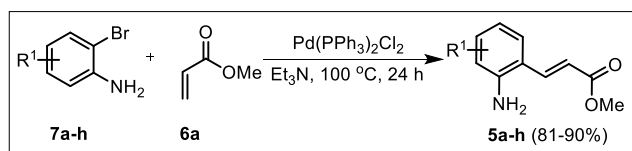

A sealed tube was charged with *o*-bromoaniline **7a-h** (11.6 mmol) and PdCl<sub>2</sub>(PPh<sub>3</sub>)<sub>2</sub> (5 mol %). Methyl acrylate (**6a**, 13.9 mmol) and Et<sub>3</sub>N (10 mL) were added, and the sealed tube was flushed twice with argon gas. It was sealed with a screw cap and placed in a preheated oil bath at 100 °C for 24 h. The reaction mixture was then cooled to room temperature and diluted with water (60 mL) followed by extraction with EtOAc (3 x 100 mL). The organic layer was separated and dried over anhydrous Na<sub>2</sub>SO<sub>4</sub>. Evaporation of the solvent under *vacuo* to dryness followed by the purification of the crude product using column chromatography (petroleum ether:ethyl acetate, 4:1) provided the expected aniline-ester **5a-h** in very good yields.

### [B] General Experimental Procedure for Quinazolinone-ester **9a-h**.

All the reactions were performed on 1 g of **5a-h**.

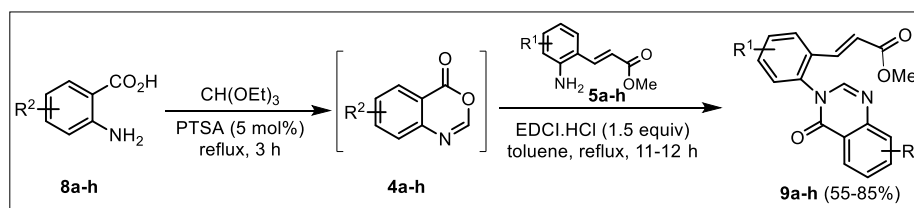

Triethyl orthoformate (15 equiv) was added to a mixture of anthranilic acid **8a-h** (1 equiv) and *p*-toluenesulfonic acid (5 mol %) at room temperature. The reaction mixture was refluxed for 3 hours. After completion of the reaction, triethyl orthoformate was evaporated under *vacuo*. The obtained pale yellow solid **4a-h** was used further without any purification.<sup>2</sup>

The solution of benzoxazinone **4a-h** (1 equiv), EDCI (1.5 equiv) and amine-ester **5a-h** (0.75 equiv) in toluene was refluxed for 11-12 hours. After completion, the reaction mixture was cooled to room temperature and the solution was poured into 15 mL of distilled water and extracted with EtOAc (3 x 15 mL). The organic phase was washed successively with water and brine solution followed by drying over Na<sub>2</sub>SO<sub>4</sub>. The combined organic layer was concentrated and the crude product was purified by flash column chromatography using petroleum ether and ethyl acetate to afford quinazolinone-ester **9a-h** in moderate to very good yields.

### [C] General Experimental Procedure for Quinazolinone-alcohol **10a-h**.

All the reactions were performed on 1 g of **9a-h**.

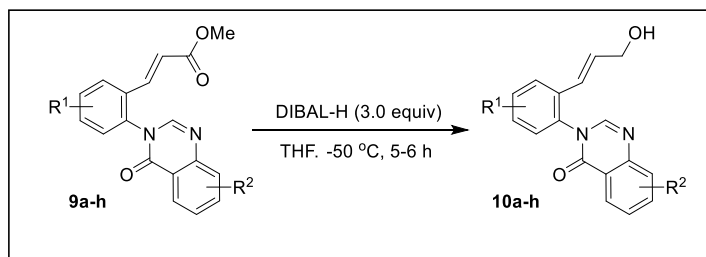

To a solution of quinazolinone-ester **9a-h** (1.0 equiv) in anhydrous THF (10 mL) in a flame-dried two-neck round-bottom flask was added DIBAL-H (1.0 M in THF, 3.0 equiv) at -50 °C under argon atmosphere. The resultant reaction mixture was stirred at -50 °C for 5-6 h under argon atmosphere before quenching with saturated aqueous solution of Rochelle salt (2 mL). The aqueous phase was extracted with DCM (5 x 10 mL). The combined organic extracts were dried over anhydrous Na<sub>2</sub>SO<sub>4</sub>, filtered through a thin plug of celite<sup>®</sup>, and concentrated under reduced pressure. The crude products **10a-h** were used for the next step without further purification.

#### [D] General Experimental Procedure for Quinazolinone-aldehyde **3a-h**.

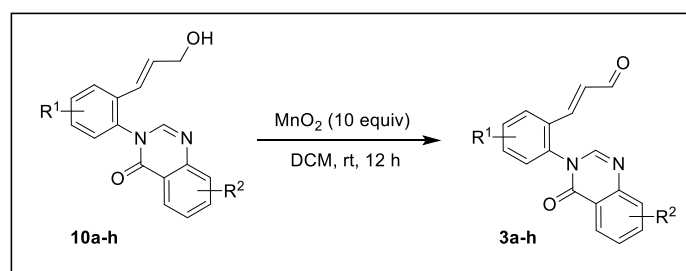

The solution of crude alcohol **10a-h** (1 equiv) in DCM (10 mL) was added  $\text{MnO}_2$  (10.0 equiv.). The reaction mixture was stirred overnight at room temperature. Excess  $\text{MnO}_2$  was removed by filtration. The combined organic layer was concentrated. The crude product was purified by flash column chromatography using first petroleum ether:ethyl acetate (4:1, 150mL) followed by DCM:MeOH (19:1) to afford quinazolinone-aldehyde **3a-h** in good yields.

#### [E] General Experimental Procedure for the synthesis of Pyrroloindoloquinazolinone **2a-h**.

All the reactions were performed on 50 mg of **3a-h**.

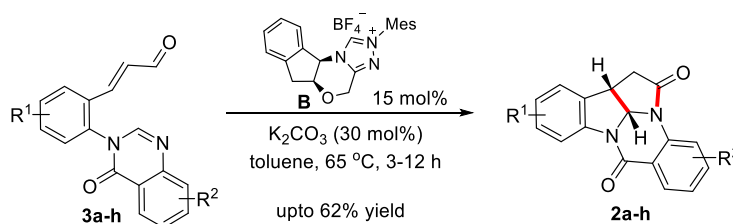

A reaction mixture containing  $\text{K}_2\text{CO}_3$  (30 mol%), NHC-precatalyst **B** (15 mol %), and aldehyde **3a-h** (50 mg, 1.0 equiv) in dry toluene (2 mL) under argon atmosphere was stirred by a magnetic stirring bar at 65 °C for 3-12 h. The progress of the reaction was monitored by TLC. After completion of the reaction, the crude reaction mixture was cooled to room temperature and filtered through a bed of celite<sup>®</sup>. The residue was washed with ethyl acetate (3 x 5 mL) and the combined filtrate was evaporated under reduced pressure. The crude product was purified by column chromatography on neutral alumina (70-230 mesh) using a solvent gradient of petroleum ether and ethyl acetate to furnish the desired products **2a-h** in moderate to good yields.

**[F] Selected oxidation reactions of deoxy-cruciferane attempted:**

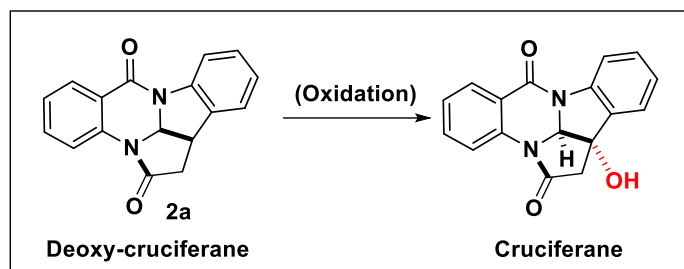

| Sr. No | Condition                                                                                       | Solvent              | Observation           |
|--------|-------------------------------------------------------------------------------------------------|----------------------|-----------------------|
| 1      | DDQ, rt/heating                                                                                 | DCM                  | No reaction           |
| 2      | SeO <sub>2</sub> , rt/heating                                                                   | 1,4-dioxane          | No reaction           |
| 3      | RuCl <sub>3</sub> .nH <sub>2</sub> O; Pyridine; KBrO, 60 °C                                     | CAN-H <sub>2</sub> O | Decomposition         |
| 4      | NBS; H <sub>2</sub> O, rt/heating                                                               | 1,4-dioxane          | No reaction           |
| 5      | K <sub>2</sub> S <sub>2</sub> O <sub>8</sub> ; CuSO <sub>4</sub> .5H <sub>2</sub> O, rt/heating | Pyridine             | Complex reaction mix. |
| 6      | CrO <sub>3</sub> ; H <sub>5</sub> IO <sub>6</sub> , rt/heating                                  | ACN                  | Decomposition         |
| 7      | KMnO <sub>4</sub> ; BnEt <sub>3</sub> N.Cl, rt/heating                                          | DCE                  | No reaction           |
| 8      | KMnO <sub>4</sub> , rt/heating                                                                  | Acetone              | No reaction           |
| 9      | MnO <sub>2</sub> , rt/heating                                                                   | DCM                  | No reaction           |

### 3. Characterization Data of Compounds:

#### Methyl (E)-3-(2-(4-oxoquinazolin-3(4H)-yl)phenyl)acrylate (9a) : Procedure [B]

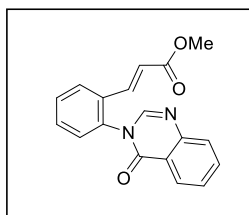

**Reaction Time:** 11 h; Rf: 0.4 (3:2, Pet. Ether:EtOAc); white solid; Mp = 122-123 °C; 1.46 g, 85% yield; <sup>1</sup>H NMR (400 MHz, CDCl<sub>3</sub>) δ 8.30 (dd, *J* = 8.4, 1.5 Hz, 1H), 7.91 (s, 1H), 7.80-7.71 (m, 3H), 7.54-7.46 (m, 3H), 7.38 (d, *J* = 16.0 Hz, 1H), 7.31-7.24 (m, 1H), 6.40 (d, *J* = 16.0 Hz, 1H), 3.63 (s, 3H); <sup>13</sup>C NMR (100 MHz, CDCl<sub>3</sub>) δ 166.4, 160.7, 148.0, 145.8, 138.2, 136.6, 134.9, 132.6, 131.3, 130.1, 128.9, 127.9, 127.8, 127.7, 127.3, 122.2, 121.7, 51.8; **ESI HRMS:** calcd for C<sub>18</sub>H<sub>14</sub>N<sub>2</sub>O<sub>3</sub> [M + H]<sup>+</sup>: 307.1077, found: 307.1079.

#### (E)-3-(2-(3-Hydroxyprop-1-en-1-yl)phenyl)quinazolin-4(3H)-one (10a) : Procedure [C]

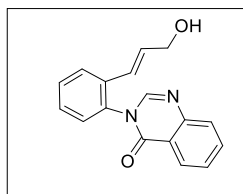

**Reaction Time:** 6 h; Rf: 0.4 (1:1, Pet. Ether:EtOAc); **ESI HRMS:** calcd for C<sub>17</sub>H<sub>14</sub>O<sub>2</sub>N<sub>2</sub> [M + H]<sup>+</sup>: 279.1128, found: 279.1127.

#### (E)-3-(2-(4-Oxoquinazolin-3(4H)-yl)phenyl)acrylaldehyde (3a) : Procedure [D]

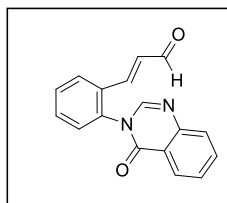

**Reaction Time:** 12 h; Rf: 0.5 (3:2, Pet. Ether:EtOAc); white solid; Mp = 236-238 °C; 0.63 mg, 70% yield; <sup>1</sup>H NMR (400 MHz, CDCl<sub>3</sub>) δ 9.48 (d, *J* = 7.3 Hz, 1H), 8.32 (d, 7.9 Hz, 1H), 7.95 (s, 1H), 7.87-7.72 (m, 3H), 7.63-7.49 (m, 3H), 7.33 (d, *J* = 7.9 Hz, 1H), 7.19 (d, *J* = 15.9 Hz, 1H), 6.67 (dd, *J* = 15.9, 7.3 Hz, 1H); <sup>13</sup>C NMR (100 MHz, CDCl<sub>3</sub>) δ 193.1, 160.7,

148.0, 145.7, 145.4, 136.8, 135.1, 132.3, 132.1, 131.4, 130.3, 129.0, 128.1, 127.92, 127.91, 127.3, 122.0 ; **ESI HRMS**: calcd for  $C_{17}H_{12}O_2N_2$   $[M + H]^+$ : 277.0972, found: 277.0971.

**2a<sup>1</sup>,11b-Dihydro-7H-2a,7a-diazabenzob[b]cyclopenta[im]fluorene-2,7(1H)-dione (2a) :**  
**Procedure [E]**

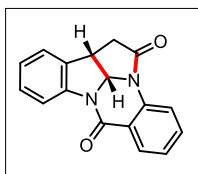

**Reaction Time:** 4 h; **Rf:** 0.5 (3:2, Pet. Ether:EtOAc); white solid; **Mp** = 178-180 °C; 21 mg, 42% yield;  $[\alpha]_D^{24}$  -272.0 (c 0.2,  $CHCl_3$ ); **<sup>1</sup>H NMR (400 MHz,  $CDCl_3$ )**  $\delta$  8.10 (d,  $J$  = 8.3 Hz, 1H), 7.99 (d,  $J$  = 7.5 Hz, 1H), 7.74 (d,  $J$  = 7.5 Hz, 1H), 7.56 (t,  $J$  = 7.5 Hz, 1H), 7.35-7.23 (m, 3H), 7.06 (t,  $J$  = 7.5 Hz, 1H), 5.94 (d,  $J$  = 8.3 Hz, 1H), 4.18-4.05 (m, 1H), 3.23 (dd,  $J$  = 18.8, 11.2 Hz, 1H), 2.62 (dd,  $J$  = 18.8, 4.9 Hz, 1H); **<sup>13</sup>C NMR (100 MHz,  $CDCl_3$ )**  $\delta$  170.8, 159.7, 141.3, 136.2, 133.6, 132.23, 129.3, 129.0, 126.3, 124.91, 124.88, 123.6, 121.7, 115.8, 76.7, 37.9, 36.1; **ESI HRMS**: calcd for  $C_{17}H_{12}O_2N_2$   $[M + H]^+$ : 277.0972, found: 277.0970. **HPLC**: Chiralpak IC, n-hexane/IPA = 70:30, 1.0 mL/min,  $\lambda$  = 220 nm,  $t_R$  (major) = 25.257 min,  $t_R$  (minor) = 28.610 min (78:22 er).

**Methyl (E)-3-(4-methyl-2-(4-oxoquinazolin-3(4H)-yl)phenyl)acrylate (9b) : Procedure [B]**

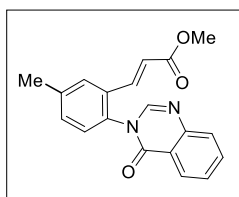

**Reaction Time:** 11 h; **Rf:** 0.5 (3:2, Pet. Ether:EtOAc); white solid; **Mp** = 161-163 °C; 1.3 g, 77% yield; **<sup>1</sup>H NMR (500 MHz,  $CDCl_3$ )**  $\delta$  8.36 (dd,  $J$  = 8.0, 1.1 Hz, 1H), 7.97 (s, 1H), 7.83 (t,  $J$  = 8.0 Hz, 1H), 7.80 (d,  $J$  = 7.3 Hz, 1H), 7.61 (s, 1H), 7.57 (t,  $J$  = 8.0 Hz, 1H), 7.43 (d,  $J$  = 16.0 Hz, 1H), 7.37 (dd,  $J$  = 8.0, 1.1 Hz, 1H), 7.23 (d,  $J$  = 8.0 Hz, 1H), 6.46 (d,  $J$  = 16.0 Hz, 1H), 3.70 (s, 3H), 2.47 (s, 3H); **<sup>13</sup>C NMR (125 MHz,  $CDCl_3$ )**  $\delta$  166.4, 160.8, 148.0, 146.0, 140.2, 138.3, 134.7, 134.2, 132.1, 132.3, 128.6, 128.1, 127.8, 127.7, 127.3, 122.2, 121.4, 51.7, 21.2; **ESI HRMS**: calcd for  $C_{19}H_{16}O_3N_2$   $[M + H]^+$ : 321.1234, found: 321.1232.



**(E)-3-(2-(3-Hydroxyprop-1-en-1-yl)-5-methylphenyl)quinazolin-4(3H)-one (10b) :**

**Procedure [C]**

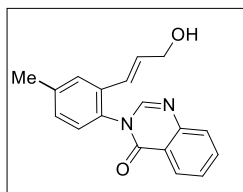

**Reaction Time:** 6 h; **R<sub>f</sub>:** 0.4 (1:1, Pet. Ether:EtOAc); **ESI HRMS:** calcd for C<sub>18</sub>H<sub>16</sub>O<sub>2</sub>N<sub>2</sub> [M + H]<sup>+</sup>: 293.1285, found: 293.1284.

**(E)-3-(4-Methyl-2-(4-oxoquinazolin-3(4H)-yl)phenyl)acrylaldehyde (3b) : Procedure [D]**

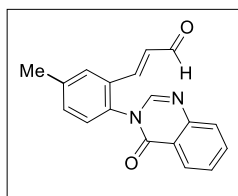

**Reaction Time:** 12 h; **R<sub>f</sub>:** 0.5 (3:2, Pet. Ether:EtOAc); white solid; **Mp** = 208-210 °C; 642 mg, 71% yield; **<sup>1</sup>H NMR (500 MHz, CDCl<sub>3</sub>)** δ 9.45 (d, *J* = 7.6 Hz, 1H), 8.29 (d, *J* = 8.0 Hz, 1H), 7.92 (s, 1H), 7.77 (t, *J* = 8.0 Hz, 1H), 7.74 (d, *J* = 8.0 Hz, 1H), 7.58 (s, 1H), 7.51 (t, *J* = 7.6 Hz, 1H), 7.36 (d, *J* = 8.0 Hz, 1H), 7.20 (d, *J* = 7.6 Hz, 1H), 7.15 (d, *J* = 16.0 Hz, 1H), 6.63 (dd, *J* = 15.6, 7.6 Hz, 1H), 2.41 (s, 3H); **<sup>13</sup>C NMR (125 MHz, CDCl<sub>3</sub>)** δ 193.1, 160.8, 148.0, 145.9, 145.6, 140.5, 134.9, 134.3, 133.0, 131.6, 131.2, 128.7, 128.3, 128.0, 127.8, 127.3, 122.0, 21.2; **ESI HRMS:** calcd for C<sub>18</sub>H<sub>14</sub>O<sub>2</sub>N<sub>2</sub> [M + H]<sup>+</sup>: 291.1128, found: 291.1127.

**9-Methyl-2a<sup>1</sup>,11b-dihydro-7H-2a,7a-diazabenzob[*b*]cyclopenta[*lm*]fluorene-2,7(1H)-dione (2b) : Procedure [E]**

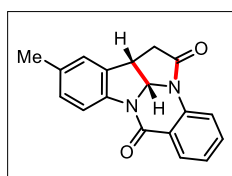

**Reaction Time:** 3 h; **R<sub>f</sub>:** 0.6 (3:2, Pet. Ether:EtOAc); white solid; **Mp** = 196-198 °C; 18 mg, 35% yield; **[α]<sub>D</sub><sup>24</sup>** -198.2 (*c* 0.2, CHCl<sub>3</sub>); **<sup>1</sup>H NMR (500 MHz, CDCl<sub>3</sub>)** δ 8.17 (d, *J* = 7.6 Hz, 1H), 7.95 (d, *J* = 8.0 Hz, 1H), 7.81 (d, *J* = 8.0 Hz, 1H), 7.63 (t, *J* = 7.6 Hz, 1H), 7.40 (t, *J* =

7.6 Hz, 1H), 7.18-7.09 (m, 2H), 6.00 (d,  $J = 8.4$  Hz, 1H), 3.29 (dd,  $J = 17.9, 11.1$  Hz, 1H), 2.69 (dd,  $J = 18.3, 4.2$  Hz, 1H), 2.36 (s, 3H);  $^{13}\text{C}$  NMR (125 MHz,  $\text{CDCl}_3$ )  $\delta$  170.9, 159.4, 139.0, 136.2, 134.8, 133.5, 132.3, 129.7, 129.0, 126.2, 125.5, 123.8, 121.8, 115.5, 76.8, 37.9, 36.1, 21.1; **ESI HRMS**: calcd for  $\text{C}_{18}\text{H}_{14}\text{O}_2\text{N}_2$   $[\text{M} + \text{H}]^+$ : 291.1128, found: 291.1136. **HPLC**: Chiralpak IA, n-hexane/IPA = 80:20, 1.0 mL/min,  $\lambda = 220$  nm,  $t_{\text{R}}$  (major) = 28.610 min,  $t_{\text{R}}$  (minor) = 25.257 min (73:27 er).

**Methyl (E)-3-(4-fluoro-2-(4-oxoquinazolin-3(4H)-yl)phenyl)acrylate (9c) : Procedure [B]**

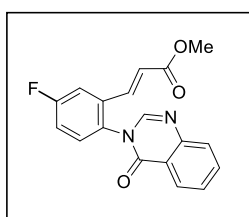

**Reaction Time**: 11 h; **Rf**: 0.5 (3:2, Pet. Ether:EtOAc); white solid; **Mp** = 165-167 °C; 1.41 g, 85% yield;  $^1\text{H}$  NMR (400 MHz,  $\text{CDCl}_3$ )  $\delta$  8.36 (dd,  $J = 7.6, 1.5$  Hz, 1H), 7.96 (s, 1H), 7.85 (dd,  $J = 6.9, 1.5$  Hz, 1H), 7.81 (d,  $J = 8.4$  Hz, 1H), 7.62-7.56 (m, 1H), 7.50 (dd,  $J = 9.2, 3.1$  Hz, 1H), 7.40-7.32 (m, 2H), 7.30-7.24 (m, 1H), 6.46 (d,  $J = 16.0$  Hz, 1H), 3.72 (s, 3H);  $^{13}\text{C}$  NMR (100 MHz,  $\text{CDCl}_3$ )  $\delta$  166.0, 162.9 (d,  $J = 250.2$  Hz, C-F), 160.8, 147.9, 145.6, 137.1 (d,  $J = 1.9$  Hz), 135.0, 134.76 (d,  $J = 8.6$  Hz), 132.5 (d,  $J = 2.9$  Hz), 130.84 (d,  $J = 8.6$  Hz), 128.0, 127.8, 127.3, 122.9, 122.0, 118.3 (d,  $J = 23.0$  Hz), 114.2 (d,  $J = 24$  Hz), 52.0; **ESI HRMS**: calcd for  $\text{C}_{18}\text{H}_{13}\text{O}_3\text{N}_2\text{F}$   $[\text{M} + \text{H}]^+$ : 325.0983, found: 325.0986.

**(E)-3-(5-Fluoro-2-(3-hydroxyprop-1-en-1-yl)phenyl)quinazolin-4(3H)-one (10c) : Procedure [C]**

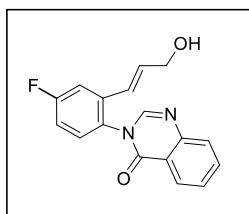

**Reaction Time**: 6 h; **Rf**: 0.4 (1:1, Pet. Ether:EtOAc); **ESI HRMS**: calcd for  $\text{C}_{17}\text{H}_{13}\text{O}_2\text{N}_2\text{F}$   $[\text{M} + \text{H}]^+$ : 297.1034, found: 297.1032.

**(E)-3-(4-Fluoro-2-(4-oxoquinazolin-3(4H)-yl)phenyl)acrylaldehyde (3c) : Procedure [D]**

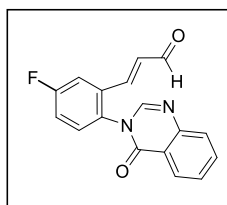

**Reaction Time:** 12 h; R<sub>f</sub>: 0.5 (3:2, Pet. Ether:EtOAc); white solid; Mp = 195-197 °C; 551 mg, 61% yield; **<sup>1</sup>H NMR (500 MHz, CDCl<sub>3</sub>)** δ 9.56 (d, *J* = 7.6 Hz, 1H), 8.37 (d, *J* = 8.0 Hz, 1H), 7.99 (s, 1H), 7.87 (t, *J* = 7.3 Hz, 1H), 7.83 (d, *J* = 8.0 Hz, 1H), 7.61 (t, *J* = 7.3 Hz, 1H), 7.54 (dd, *J* = 8.7, 2.3 Hz, 1H), 7.40 (dd, *J* = 8.4, 4.5 Hz, 1H), 7.36-7.31 (m, 1H), 7.19 (d, *J* = 16.0 Hz, 1H), 6.70 (dd, *J* = 15.6, 7.3 Hz, 1H); **<sup>13</sup>C NMR (125 MHz, CDCl<sub>3</sub>)** δ 192.6, 163.0 (d, *J* = 251.7 Hz, C-F), 160.7, 147.9, 145.6, 143.9, 135.2, 134.3 (d, *J* = 7.6 Hz), 132.7 (d, *J* = 2.9 Hz), 132.3, 131.0 (d, *J* = 9.5 Hz), 128.2, 128.0, 127.3, 122.0, 119.2 (d, *J* = 23.8 Hz), 114.5 (d, *J* = 23.8 Hz); **ESI HRMS:** calcd for C<sub>17</sub>H<sub>11</sub>O<sub>2</sub>N<sub>2</sub>F[M + H]<sup>+</sup>: 295.0877, found: 295.0877.

**9-Fluoro-2a<sup>1</sup>,11b-dihydro-7H-2a,7a-diazabenzob[b]cyclopenta[lm]fluorene-2,7(1H)-dione. (2c) : Procedure [E]**

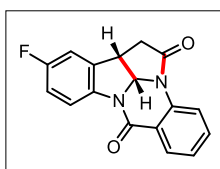

**Reaction Time:** 4 h; R<sub>f</sub>: 0.6 (3:2, Pet. Ether:EtOAc); white solid; Mp = 210-212 °C; 19 mg, 37% yield; [α]<sub>D</sub><sup>24</sup> -197.4 (*c* 0.24, CHCl<sub>3</sub>); **<sup>1</sup>H NMR (400 MHz, CDCl<sub>3</sub>)** δ 8.17 (d, *J* = 7.9 Hz, 1H), 8.04 (dd, *J* = 9.7, 4.9 Hz, 1H), 7.82 (d, *J* = 8.5 Hz, 1H), 7.65 (t, *J* = 7.4 Hz, 1H), 7.41 (t, *J* = 7.4 Hz, 1H), 7.05 (d, *J* = 8.5 Hz, 2H), 6.05 (d, *J* = 8.5 Hz, 1H), 4.26-4.09 (m, 1H), 3.31 (dd, *J* = 17.7, 11.0 Hz, 1H), 2.70 (dd, *J* = 18.3, 4.9 Hz, 1H); **<sup>13</sup>C NMR (100 MHz, CDCl<sub>3</sub>)** δ 170.4, 159.9 (d, *J* = 244.3 Hz, C-H), 159.5, 137.5 (d, *J* = 1.5 Hz), 136.1, 133.9 (d, *J* = 7.7 Hz), 133.7, 129.0, 126.4, 123.5, 121.8, 116.7 (d, *J* = 8.5 Hz), 115.8 (d, *J* = 23.1 Hz), 112.3 (d, *J* = 24.7 Hz), 76.9, 37.6, 36.1; **ESI HRMS:** calcd for C<sub>17</sub>H<sub>11</sub>O<sub>2</sub>N<sub>2</sub>F [M + H]<sup>+</sup>: 295.0877, found: 295.0879. **HPLC:** Chiralpak IC, n-hexane/IPA = 70:30, 1.0 mL/min, λ = 220 nm, t<sub>R</sub> (major) = 38.227 min, t<sub>R</sub> (minor) = 31.203 min (71:29 er).

**Methyl (E)-3-(4-chloro-2-(4-oxoquinazolin-3(4H)-yl)phenyl)acrylate (9d) : Procedure [B]**

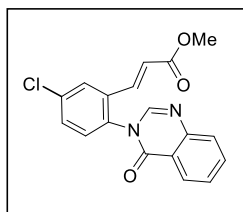

**Reaction Time:** 11 h; Rf: 0.5 (3:2, Pet. Ether:EtOAc); white solid; Mp = 190-192 °C; 1.15 g, 72% yield; <sup>1</sup>H NMR (400 MHz, CDCl<sub>3</sub>) δ 8.28 (dd, *J* = 7.6, 1.5 Hz, 1H), 7.86 (s, 1H), 7.77 (dd, *J* = 6.9, 1.5 Hz, 1H), 7.74 (s, 1H), 7.72-7.70 (m, 1H), 7.54-7.44 (m, 1H), 7.46 (dd, *J* = 8.4, 2.3 Hz, 1H), 7.29 (d, *J* = 16.0 Hz, 1H), 7.23 (d, *J* = 8.4 Hz, 1H), 6.40 (d, *J* = 16.0 Hz, 1H), 3.64 (s, 3H); <sup>13</sup>C NMR (100 MHz, CDCl<sub>3</sub>) δ 166.0, 160.6, 147.9, 145.4, 136.9, 136.2, 135.0, 134.9, 134.2, 131.2, 130.2, 128.1, 127.9, 127.7, 127.3, 123.0, 122.0, 52.0; **ESI HRMS:** calcd for C<sub>18</sub>H<sub>13</sub>O<sub>3</sub>N<sub>2</sub>Cl [M + H]<sup>+</sup>: 341.0687, found: 341.0687.

**(E)-3-(5-Chloro-2-(3-hydroxyprop-1-en-1-yl)phenyl)quinazolin-4(3H)-one (10d) : Procedure [C]**

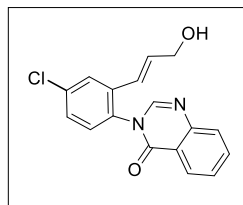

**Reaction Time:** 6 h; Rf: 0.4 (1:1, Pet. Ether:EtOAc); **ESI HRMS:** calcd for C<sub>17</sub>H<sub>13</sub>O<sub>2</sub>N<sub>2</sub>Cl [M + H]<sup>+</sup>: 313.0738, found: 313.0736.

**(E)-3-(4-chloro-2-(4-oxoquinazolin-3(4H)-yl)phenyl)acrylaldehyde (3d) : Procedure [D]**

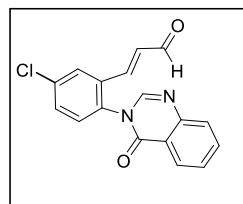

**Reaction Time:** 12 h; Rf: 0.5 (3:2, Pet. Ether:EtOAc); white solid; Mp = 218-220 °C; 581 mg, 64% yield; <sup>1</sup>H NMR (400 MHz, CDCl<sub>3</sub>) δ 9.47 (d, *J* = 7.3 Hz, 1H), 8.29 (d, *J* = 7.9 Hz, 1H), 7.90 (s, 1H), 7.85-7.70 (m, 3H), 7.53 (t, *J* = 7.9 Hz, 2H), 7.28 (d, *J* = 8.5 Hz, 1H), 7.10

(d,  $J = 15.9$  Hz, 1H), 6.63 (dd,  $J = 16.2, 7.9$  Hz, 1H);  $^{13}\text{C}$  NMR (100 MHz,  $\text{CDCl}_3$ )  $\delta$  192.6, 160.5, 147.9, 145.3, 143.7, 136.5, 135.2, 135.0, 133.7, 132.2, 132.0, 130.3, 128.2, 127.9, 127.8, 127.3, 121.9; **ESI HRMS**: calcd for  $\text{C}_{17}\text{H}_{11}\text{O}_2\text{N}_2\text{Cl}$  [ $\text{M} + \text{H}$ ] $^+$ : 311.0582, found: 311.0580.

**9-Chloro-2a<sup>1</sup>,11b-dihydro-7H-2a,7a-diazabenzob[b]cyclopenta[lm]fluorene-2,7(1H)-dione. (2d) : Procedure [E]**

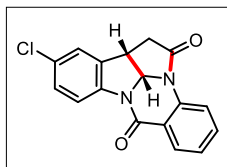

**Reaction Time:** 4 h; Rf: 0.6 (3:2, Pet. Ether:EtOAc); white solid; Mp = 190-192 °C; 20 mg, 40% yield;  $[\alpha]_D^{24}$  -215.3 ( $c$  0.1,  $\text{CHCl}_3$ );  $^1\text{H}$  NMR (500 MHz,  $\text{CDCl}_3$ )  $\delta$  8.18 (dd,  $J = 7.6, 1.1$  Hz, 1H), 8.01 (d,  $J = 9.2$  Hz, 1H), 7.83 (d,  $J = 8.0$  Hz, 1H), 7.66 (t,  $J = 7.6$  Hz, 1H), 7.42 (t,  $J = 7.6$  Hz, 1H), 7.34-7.29 (m, 2H), 6.04 (d,  $J = 8.8$  Hz, 1H), 4.22-4.14 (m, 1H), 3.31 (dd,  $J = 18.0, 11.1$  Hz, 1H), 2.71 (dd,  $J = 18.3, 5.0$  Hz, 1H);  $^{13}\text{C}$  NMR (125 MHz,  $\text{CDCl}_3$ )  $\delta$  170.4, 159.6, 140.0, 136.2, 134.0, 133.8, 129.8, 129.4, 129.1, 126.4, 125.2, 123.4, 121.9, 116.7, 76.8, 37.6, 36.0; **ESI HRMS**: calcd for  $\text{C}_{17}\text{H}_{11}\text{O}_2\text{N}_2\text{Cl}$  [ $\text{M} + \text{H}$ ] $^+$ : 311.0582, found: 311.0583. **HPLC**: Chiralpak IC, n-hexane/IPA = 70:30, 1.0 mL/min,  $\lambda = 220$  nm,  $t_R$  (major) = 42.273 min,  $t_R$  (minor) = 35.413 min (76:24 er).

**Methyl (E)-3-(5-methoxy-4-methyl-2-(4-oxoquinazolin-3(4H)-yl)phenyl)acrylate (9e) : Procedure [B]**

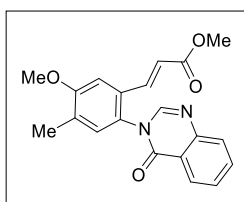

**Reaction Time:** 11 h; Rf: 0.5 (1:1, Pet. Ether:EtOAc); white solid; Mp = 212-214 °C; 871 mg, 55% yield;  $^1\text{H}$  NMR (400 MHz,  $\text{CDCl}_3$ )  $\delta$  8.37 (d,  $J = 6.9$  Hz, 1H), 7.97 (s, 1H), 7.87-7.77 (m, 2H), 7.57 (t,  $J = 8.0$  Hz, 1H), 7.39 (d,  $J = 15.3$  Hz, 1H), 7.16 (s, 1H), 7.10 (s, 1H), 6.43 (d,  $J = 16.0$  Hz, 1H), 3.94 (s, 3H), 3.71 (s, 3H), 2.28 (s, 3H);  $^{13}\text{C}$  NMR (100 MHz,  $\text{CDCl}_3$ )  $\delta$  166.6, 161.1, 158.6, 148.0, 146.4, 138.4, 134.7, 131.4, 130.7, 130.6, 129.1, 127.8,

127.7, 127.3, 122.2, 120.5, 107.6, 55.7, 51.8, 16.3; **ESI HRMS**: calcd for C<sub>20</sub>H<sub>18</sub>O<sub>4</sub>N<sub>2</sub> [M + H]<sup>+</sup>: 351.1339, found: 351.1343.

**(E)-3-(2-(3-Hydroxyprop-1-en-1-yl)-4-methoxy-5-methylphenyl)quinazolin-4(3H)-one (10e) : Procedure [C]**

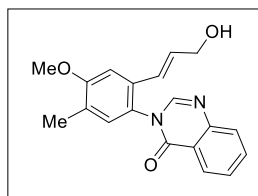

**Reaction Time**: 5 h; R<sub>f</sub>: 0.3 (1:1, Pet. Ether:EtOAc); **ESI HRMS**: calcd for C<sub>19</sub>H<sub>18</sub>O<sub>3</sub>N<sub>2</sub> [M + H]<sup>+</sup>: 323.1390, found: 323.1388.

**(E)-3-(5-Methoxy-4-methyl-2-(4-oxoquinazolin-3(4H)-yl)phenyl)acrylaldehyde (3e) : Procedure [D]**

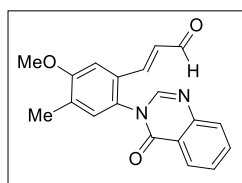

**Reaction Time**: 12 h; R<sub>f</sub>: 0.5 (1:1, Pet. Ether:EtOAc); white solid; Mp = 234-236 °C; 475 mg, 52% yield; **<sup>1</sup>H NMR (400 MHz, CDCl<sub>3</sub>)** δ 9.45 (d, *J* = 7.6 Hz, 1H), 8.30 (d, *J* = 7.6 Hz, 1H), 7.93 (s, 1H), 7.82-7.71 (m, 2H), 7.52 (t, *J* = 8.4 Hz, 1H), 7.12 (d, *J* = 16.0 Hz, 1H), 7.13 (s, 1H), 7.08 (s, 1H), 6.63 (dd, *J* = 16.0, 7.6 Hz, 1H), 3.88 (s, 3H), 2.23 (s, 3H); **<sup>13</sup>C NMR (100 MHz, CDCl<sub>3</sub>)** δ 193.3, 161.0, 158.6, 147.9, 146.2, 145.7, 134.9, 132.6, 130.7, 130.3, 130.2, 129.3, 127.9, 127.8, 127.2, 122.0, 107.5, 55.7, 16.4; **ESI HRMS**: calcd for C<sub>19</sub>H<sub>16</sub>O<sub>3</sub>N<sub>2</sub> [M + H]<sup>+</sup>: 321.1234, found: 321.1239.

**10-Methoxy-9-methyl-2a<sup>1</sup>,11b-dihydro-7H-2a,7a-diazabenzob[*b*]cyclopenta[*lm*]fluorene-2,7(1H)-dione. (2e) : Procedure [E]**

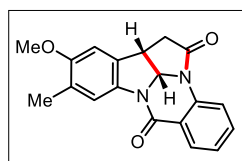

**Reaction Time**: 3 h; R<sub>f</sub>: 0.4(1:1, Pet. Ether:EtOAc); white solid; Mp = 194-196 °C; 20 mg, 39% yield; [α]<sub>D</sub><sup>24</sup> -247.3 (c 0.1, CHCl<sub>3</sub>); **<sup>1</sup>H NMR (400 MHz, CDCl<sub>3</sub>)** δ 8.17 (d, *J* = 7.3 Hz,

1H), 7.91 (s, 1H), 7.80 (d,  $J = 8.5$  Hz, 1H), 7.62 (t,  $J = 7.6$  Hz, 1H), 7.40 (t,  $J = 7.6$  Hz, 1H), 6.80 (s, 1H), 5.99 (d,  $J = 8.5$  Hz, 1H), 4.21-4.09 (m, 1H), 3.85 (s, 3H), 3.27 (dd,  $J = 18.3, 11$  Hz, 1H), 2.68 (dd,  $J = 17.7, 4.9$  Hz, 1H), 2.25 (s, 3H);  $^{13}\text{C}$  NMR (100 MHz,  $\text{CDCl}_3$ )  $\delta$  170.9, 159.0, 155.4, 136.1, 134.4, 133.3, 130.3, 128.9, 127.9, 126.3, 123.9, 121.8, 118.1, 106.7, 76.9, 55.8, 37.7, 36.4, 16.6; **ESI HRMS**: calcd for  $\text{C}_{19}\text{H}_{16}\text{O}_3\text{N}_2$   $[\text{M} + \text{H}]^+$ : 321.1234, found: 321.1223. **HPLC**: Chiralpak IC, n-hexane/IPA = 70:30, 1.0 mL/min,  $\lambda = 220$  nm,  $t_{\text{R}}$  (major) = 30.787 min,  $t_{\text{R}}$  (minor) = 28.243 min (77:23 er).

**Methyl (E)-3-(2-(5-methyl-4-oxoquinazolin-3(4H)-yl)phenyl)acrylate (9f) : Procedure [B]**

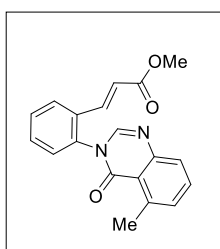

**Reaction Time**: 11 h;  $R_f$ : 0.5 (3:2, Pet. Ether:EtOAc); white solid;  $\text{Mp} = 130\text{-}132$  °C; 1.31 g, 73% yield;  $^1\text{H}$  NMR (500 MHz,  $\text{CDCl}_3$ )  $\delta$  7.93 (s, 1H), 7.82 (dd,  $J = 7.3, 1.9$  Hz, 1H), 7.67 (t,  $J = 8.0$  Hz, 1H), 7.64 (d,  $J = 6.8$  Hz, 1H), 7.59-7.52 (m, 2H), 7.49 (d,  $J = 16.0$  Hz, 1H), 7.36-7.31 (m, 2H), 6.49 (d,  $J = 16.0$  Hz, 1H), 3.73 (s, 3H), 2.87 (s, 3H);  $^{13}\text{C}$  NMR (125 MHz,  $\text{CDCl}_3$ )  $\delta$  166.5, 161.3, 149.6, 145.5, 142.0, 138.3, 136.9, 133.9, 132.6, 131.3, 130.6, 129.9, 129.1, 127.6, 126.0, 121.6, 120.7, 51.8, 23.2; **ESI HRMS**: calcd for  $\text{C}_{19}\text{H}_{16}\text{O}_3\text{N}_2$   $[\text{M} + \text{H}]^+$ : 321.1234, found: 321.1233.

**(E)-3-(2-(3-Hydroxyprop-1-en-1-yl)phenyl)-5-methylquinazolin-4(3H)-one (10f) : Procedure [C]**

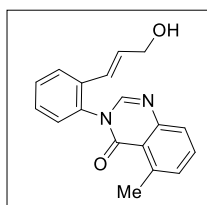

**Reaction Time**: 5 h;  $R_f$ : 0.3 (1:1, Pet. Ether:EtOAc); **ESI HRMS**: calcd for  $\text{C}_{18}\text{H}_{16}\text{O}_2\text{N}_2$   $[\text{M} + \text{H}]^+$ : 293.1285, found: 293.1283.

**(E)-3-(2-(5-Methyl-4-oxoquinazolin-3(4H)-yl)phenyl)acrylaldehyde (3f) : Procedure [D]**

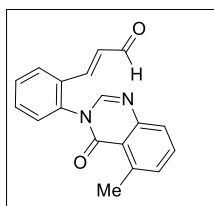

**Reaction Time:** 12 h; **Rf:** 0.5 (3:2, Pet. Ether:EtOAc); white solid; 589 mg, 65% yield;  $^1\text{H}$  **NMR (400 MHz,  $\text{CDCl}_3$ )**  $\delta$  9.55 (d,  $J = 7.6$  Hz, 1H), 7.94 (s, 1H), 7.85 (dd,  $J = 7.6, 1.5$  Hz, 1H), 7.68-7.57 (m, 4H), 7.38 (dd,  $J = 7.6, 1.5$  Hz, 1H), 7.33 (d,  $J = 6.9$  Hz, 1H), 7.27 (d,  $J = 16.0$  Hz, 1H), 6.72 (dd,  $J = 16.0, 7.6$  Hz, 1H), 2.9 (s, 3H);  $^{13}\text{C}$  **NMR (100 MHz,  $\text{CDCl}_3$ )**  $\delta$  193.2, 161.3, 149.6, 145.5, 145.4, 142.0, 136.9, 134.2, 132.2, 132.1, 131.3, 130.8, 130.2, 129.2, 127.7, 126.0, 120.5, 23.2; **ESI HRMS:** calcd for  $\text{C}_{18}\text{H}_{14}\text{O}_2\text{N}_2$   $[\text{M} + \text{H}]^+$ : 291.1128, found: 291.1129.

**6-Methyl-2a<sup>1</sup>,11b-dihydro-7H-2a,7a-diazabenzob[b]cyclopenta[lm]fluorene-2,7(1H)-dione (2f) : Procedure [E]**

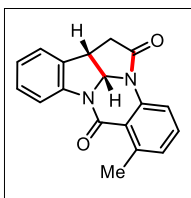

**Reaction Time:** 6 h; **Rf:** 0.6 (3:2, Pet. Ether:EtOAc); white solid; 16 mg, 32% yield;  $[\alpha]_{\text{D}}^{24} - 184.3$  ( $c$  0.1,  $\text{CHCl}_3$ );  $^1\text{H}$  **NMR (400 MHz,  $\text{CDCl}_3$ )**  $\delta$  8.19 (d,  $J = 7.6$  Hz, 1H), 7.96 (d,  $J = 8.0$  Hz, 1H), 7.83 (d,  $J = 8.0$  Hz, 1H), 7.64 (t,  $J = 7.6$  Hz, 1H), 7.41 (t,  $J = 7.4$  Hz, 1H), 7.20-7.10 (m, 2H), 6.02 (d,  $J = 8.4$  Hz, 1H), 4.22-4.10 (m, 1H), 3.30 (dd,  $J = 18.1, 11.0$  Hz, 1H), 2.69 (dd,  $J = 18.3, 4.3$  Hz, 1H), 2.38 (s, 3H);  $^{13}\text{C}$  **NMR (100 MHz,  $\text{CDCl}_3$ )**  $\delta$  170.9, 159.4, 139.0, 136.2, 134.8, 133.5, 132.3, 129.7, 129.0, 126.2, 125.5, 123.8, 121.8, 115.5, 76.8, 37.9, 36.1, 21.1; **ESI HRMS:** calcd for  $\text{C}_{18}\text{H}_{14}\text{O}_2\text{N}_2$   $[\text{M} + \text{H}]^+$ : 291.1128, found: 291.1149. **HPLC:** Chiralpak IC, n-hexane/IPA = 70:30, 1.0 mL/min,  $\lambda = 220$  nm,  $t_{\text{R}}$  (major) = 23.107 min,  $t_{\text{R}}$  (minor) = 27.243 min (77:23 er).



**Methyl (E)-3-(2-(6-iodo-4-oxoquinazolin-3(4H)-yl)phenyl)acrylate (9g) : Procedure [B]**

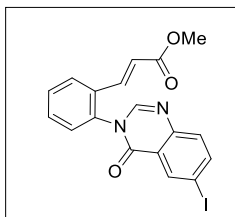

**Reaction Time:** 12 h; *R<sub>f</sub>*: 0.5 (3:2, Pet. Ether:EtOAc); white solid; 2.04 g, 84% yield; **<sup>1</sup>H NMR (500 MHz, CDCl<sub>3</sub>)**  $\delta$  8.69 (s, 1H), 8.11 (dt, *J* = 8.8, 1.9 Hz, 1H), 7.98 (s, 1H), 7.85-7.79 (m, 1H), 7.59 (d, *J* = 2.6 Hz, 1H), 7.58 (d, *J* = 3.0 Hz, 1H), 7.54 (dd, *J* = 8.4, 1.5 Hz, 1H), 7.42 (d, *J* = 16.0 Hz, 1H), 7.36-7.31 (m, 1H), 6.48 (d, *J* = 15.6 Hz, 1H), 3.72 (s, 3H); **<sup>13</sup>C NMR (125 MHz, CDCl<sub>3</sub>)**  $\delta$  166.4, 159.3, 147.3, 146.3, 143.7, 138.0, 136.3, 136.1, 132.5, 131.3, 130.3, 129.6, 128.8, 127.8, 123.7, 121.9, 92.6, 51.9; **ESI HRMS:** calcd for C<sub>18</sub>H<sub>13</sub>O<sub>3</sub>N<sub>2</sub>I [M + H]<sup>+</sup>: 433.0044, found: 433.0042.

**(E)-3-(2-(3-Hydroxyprop-1-en-1-yl)phenyl)-6-iodoquinazolin-4(3H)-one (10g) : Procedure [C]**

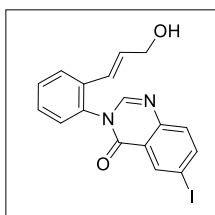

**Reaction Time:** 6 h; *R<sub>f</sub>*: 0.4 (1:1, Pet. Ether:EtOAc); **ESI HRMS:** calcd for C<sub>17</sub>H<sub>13</sub>O<sub>2</sub>N<sub>2</sub>I [M + H]<sup>+</sup>: 405.0094, found: 405.0093.

**(E)-3-(2-(6-Iodo-4-oxoquinazolin-3(4H)-yl)phenyl)acrylaldehyde (3g) : Procedure [D]**

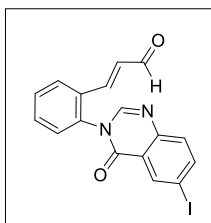

**Reaction Time:** 12 h; *R<sub>f</sub>*: 0.5 (3:2, Pet. Ether:EtOAc); white solid; 623 mg, 67% yield; **<sup>1</sup>H NMR (400 MHz, CDCl<sub>3</sub>)**  $\delta$  9.48 (d, *J* = 7.32 Hz, 1H), 8.63 (s, 1H), 8.06 (d, *J* = 7.9 Hz, 1H), 7.95 (s, 1H), 7.79 (d, *J* = 7.9 Hz, 1H), 7.62-7.52 (m, 2H), 7.49 (d, *J* = 8.5 Hz, 1H), 7.31 (d, *J*

= 6.7 Hz, 1H), 7.14 (d,  $J = 15.9$  Hz, 1H), 6.66 (dd,  $J = 15.9, 7.3$  Hz, 1H);  $^{13}\text{C}$  NMR (100 MHz,  $\text{CDCl}_3$ )  $\delta$  193.0, 159.2, 147.2, 146.2, 145.1, 143.9, 136.4, 136.1, 132.3, 132.0, 131.6, 130.5, 129.6, 128.9, 128.0, 123.5, 92.9; **ESI HRMS**: calcd for  $\text{C}_{17}\text{H}_{11}\text{O}_2\text{N}_2\text{I}$   $[\text{M} + \text{H}]^+$ : 402.9938, found: 402.9935.

**5-Iodo-2a1,11b-dihydro-7H-2a,7a-diazabenzobicyclopenta[lm]fluorene-2,7(1H)-dione. (2g) : Procedure [E]**

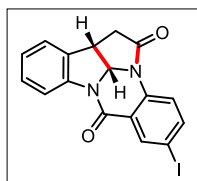

**Reaction Time:** 4 h; **Rf:** 0.6 (3:2, Pet. Ether:EtOAc); white solid; 31 mg, 62% yield;  $[\alpha]_{\text{D}}^{24} - 288.6$  ( $c$  0.1,  $\text{CHCl}_3$ );  $^1\text{H}$  NMR (400 MHz,  $\text{CDCl}_3$ )  $\delta$  8.48 (s, 1H), 8.04 (d,  $J = 7.9$  Hz, 1H), 7.93 (d,  $J = 8.5$  Hz, 1H), 7.59 (d,  $J = 8.5$  Hz, 1H), 7.39-7.30 (m, 2H), 7.16 (t,  $J = 7.3$  Hz, 1H), 6.00 (d,  $J = 8.5$  Hz, 1H), 4.25-4.15 (m, 1H), 3.30 (dd,  $J = 18.3, 11.0$  Hz, 1H), 2.70 (dd,  $J = 18.3, 4.9$  Hz, 1H);  $^{13}\text{C}$  NMR (100 MHz,  $\text{CDCl}_3$ )  $\delta$  170.6, 158.2, 142.3, 141.1, 137.8, 135.8, 132.1, 129.4, 125.2, 124.9, 123.5, 115.9, 90.2, 76.5, 37.8, 36.2; **ESI HRMS**: calcd for  $\text{C}_{17}\text{H}_{11}\text{O}_2\text{N}_2\text{I}$   $[\text{M} + \text{H}]^+$ : 402.9938, found: 402.9933. **HPLC**: Chiralpak IA, n-hexane/IPA = 85:15, 1.0 mL/min,  $\lambda = 220$  nm,  $t_{\text{R}}$  (major) = 25.583 min,  $t_{\text{R}}$  (minor) = 13.403 min (81:19 er).

**Methyl (E)-3-(2-(6-nitro-4-oxoquinazolin-3(4H)-yl)phenyl)acrylate (9h) : Procedure [B]**

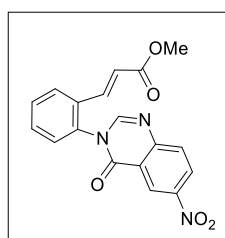

**Reaction Time:** 12 h; **Rf:** 0.4 (3:2, Pet. Ether:EtOAc); yellow solid; 1.10 g, 56% yield;  $^1\text{H}$  NMR (400 MHz,  $\text{CDCl}_3$ )  $\delta$  9.21 (d,  $J = 2.4$  Hz, 1H), 8.63 (dd,  $J = 9.2, 2.4$  Hz, 1H), 8.12 (s, 1H), 7.95 (d,  $J = 9.2$  Hz, 1H), 7.85 (dd,  $J = 5.5, 3.7$  Hz, 1H), 7.61 (dd,  $J = 5.5, 3.7$  Hz, 2H), 7.42 (d,  $J = 15.9$  Hz, 1H), 7.37 (dd,  $J = 5.5, 3.7$  Hz, 1H), 6.50 (d,  $J = 15.3$  Hz, 1H), 3.73 (s, 3H);  $^{13}\text{C}$  NMR (100 MHz,  $\text{CDCl}_3$ )  $\delta$  166.3, 159.5, 152.0, 148.7, 146.5, 137.6, 135.7, 132.4, 131.5, 130.6, 129.5, 128.9, 128.6, 127.9, 123.8, 122.5, 122.2, 51.9; **ESI HRMS**: calcd for  $\text{C}_{18}\text{H}_{13}\text{O}_5\text{N}_3$   $[\text{M} + \text{H}]^+$ : 352.0928, found: 352.0923.

**(E)-3-(2-(3-Hydroxyprop-1-en-1-yl)phenyl)-6-nitroquinazolin-4(3H)-one (10h) :**

**Procedure [C]**

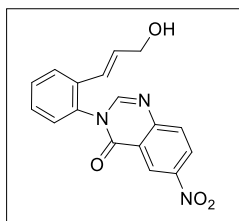

**Reaction Time:** 5 h; **R<sub>f</sub>:** 0.3 (1:1, Pet. Ether:EtOAc); **ESI HRMS:** calcd for C<sub>17</sub>H<sub>13</sub>O<sub>4</sub>N<sub>3</sub> [M + H]<sup>+</sup>: 324.0979, found: 324.0978.

**(E)-3-(2-(6-Nitro-4-oxoquinazolin-3(4H)-yl)phenyl)acrylaldehyde (3h) : Procedure [D]**

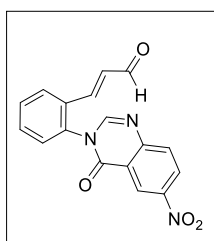

**Reaction Time:** 12 h; **R<sub>f</sub>:** 0.5 (3:2, Pet. Ether:EtOAc); yellow solid; 393 mg, 43% yield; **<sup>1</sup>H NMR (500 MHz, CDCl<sub>3</sub>)** δ 9.58 (d, *J* = 7.6 Hz, 1H), 9.23 (d, *J* = 2.7 Hz, 1H), 8.66 (dd, *J* = 8.8, 2.7 Hz, 1H), 8.17 (s, 1H), 7.98 (d, *J* = 9.2 Hz, 1H), 7.91-7.87 (m, 1H), 7.69-7.66 (m, 2H), 7.44-7.39 (m, 1H), 7.23 (d, *J* = 16.0 Hz, 1H), 6.75 (dd, *J* = 16.0, 7.6 Hz, 1H); **<sup>13</sup>C NMR (125 MHz, CDCl<sub>3</sub>)** δ 192.7, 159.5, 151.9, 148.6, 146.6, 144.5, 135.8, 132.4, 132.0, 131.9, 130.9, 129.6, 129.1, 128.9, 128.2, 123.8, 122.4; **ESI HRMS:** calcd for C<sub>17</sub>H<sub>11</sub>O<sub>4</sub>N<sub>3</sub> [M + H]<sup>+</sup>: 322.0822, found: 322.0822.

**5-Nitro-2a<sup>1</sup>,11b-dihydro-7H-2a,7a-diazabenzob[*b*]cyclopenta[*lm*]fluorene-2,7(1H)-dione. (2h) : Procedure [E]**

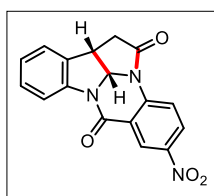

**Reaction Time:** 12 h; **R<sub>f</sub>:** 0.6 (3:2, Pet. Ether:EtOAc); yellow solid; 11 mg, 22% yield; **[α]<sub>D</sub><sup>24</sup>** -377.3 (*c* 0.1, CHCl<sub>3</sub>); **<sup>1</sup>H NMR (400 MHz, CDCl<sub>3</sub>)** δ 9.06 (d, *J* = 2.4 Hz, 1H), 8.50 (dd, *J* =

9.2, 2.5 Hz, 1H), 8.09 (d,  $J = 7.9$  Hz, 1H), 8.08 (d,  $J = 8.5$  Hz, 1H), 7.44-7.34 (m, 2H), 7.20 (t,  $J = 7.3$  Hz, 1H), 6.08 (d,  $J = 9.2$  Hz, 1H), 4.34-4.21 (m, 1H), 3.37 (dd,  $J = 18.3, 11.0$  Hz, 1H), 2.79 (dd,  $J = 18.3, 4.9$  Hz, 1H);  $^{13}\text{C}$  NMR (125 MHz,  $\text{CDCl}_3$ )  $\delta$  170.8, 157.6, 145.5, 140.9, 131.7, 129.7, 128.2, 125.6, 125.3, 125.0, 124.9, 124.4, 122.5, 115.9, 76.4, 37.8, 36.3; **ESI HRMS**: calcd for  $\text{C}_{17}\text{H}_{11}\text{O}_4\text{N}_3$   $[\text{M} + \text{H}]^+$ : 322.0822, found: 322.0820. **HPLC**: Chiralpak IA, n-hexane/IPA = 70:30, 1.0 mL/min,  $\lambda = 220$  nm,  $t_{\text{R}}$  (major) = 14.343 min,  $t_{\text{R}}$  (minor) = 11.903 min (85:15 er).

#### 4. X-ray crystallographic data of deoxy-cruciferane (2a):

X-ray intensity data measurements of compound **MA\_1\_R (2a)** was carried out on a Bruker D8 VENTURE Kappa Duo PHOTON II CPAD diffractometer equipped with Incoatech multilayer mirrors optics. The intensity measurements were carried out with Mo micro-focus sealed tube diffraction source ( $\text{CuK}\alpha = 1.54178 \text{ \AA}$ ) at 100(2) K temperature. The X-ray generator was operated at 50 kV and 1.1 mA. A preliminary set of cell constants and an orientation matrix were calculated from three sets of 36 frames. Data were collected with  $\omega$  scan width of  $0.5^\circ$  at different settings of  $\varphi$  and  $2\theta$  with a frame time of 30 secs keeping the sample-to-detector distance fixed at 6.00 cm. The X-ray data collection was monitored by APEX3 program (Bruker, 2016).<sup>3</sup> All the data were corrected for Lorentzian, polarization and absorption effects using SAINT and SADABS programs (Bruker, 2016). ShelX-97 was used for structure solution and full matrix least-squares refinement on  $F^2$ .<sup>4</sup> All the hydrogen atoms were placed in a geometrically idealized position (C-H =  $0.95 \text{ \AA}$  for the phenyl H atoms, C-H =  $1.00 \text{ \AA}$  for the methine H atoms and C-H =  $0.99 \text{ \AA}$  of the methylene H atoms) and constrained to ride on its parent atoms [Uiso(H) = 1.2 Ueq(C) for phenyl, methine and methylene H atoms]. An ORTEP III<sup>5</sup> view of compound was drawn with 50% probability displacement ellipsoids and H atoms are shown as small spheres of arbitrary radii. The absolute configuration was established by anomalous dispersion effect (Flack parameter, -0.08(7)) in X-ray diffraction measurements carried out with Cu radiation ( $\lambda = 1.54178 \text{ \AA}$ ). The single crystal X-ray diffraction data analysis clearly established that our synthesized compound has *R* and *S* configurations at C8 and C11 positions respectively.

Crystal data of **MA\_1\_R (2a)**,  $\text{C}_{17}\text{H}_{12}\text{N}_2\text{O}_2$ ,  $M = 276.29$ , colorless prismatic,  $0.34 \times 0.13 \times 0.11 \text{ mm}^3$ , Orthorhombic, space group  $P2_12_12_1$ ,  $a = 8.2455(12) \text{ \AA}$ ,  $b = 11.3533(16) \text{ \AA}$ ,  $c = 13.652(2) \text{ \AA}$ ,  $\alpha = \beta = \gamma = 90^\circ$ ,  $V = 1278.0(3) \text{ \AA}^3$ ,  $Z = 4$ ,  $T = 100(2) \text{ K}$ ,  $2\theta_{\text{max}} = 144.854^\circ$ ,  $D_{\text{calc}} (\text{g cm}^{-3}) = 1.436$ ,  $F(000) = 576$ ,  $\mu (\text{mm}^{-1}) = 0.779$ , 16043 reflections collected, 2369 unique reflections ( $R_{\text{int}} = 0.0448$ ,  $R_{\text{sig}} = 0.0291$ ), 2301 observed ( $I > 2\sigma(I)$ ) reflections, multi-scan absorption correction,  $T_{\text{min}} = 0.778$ ,  $T_{\text{max}} = 0.919$ , 190 refined parameters, Good of Fit =  $S = 1.056$ ,  $R1 = 0.0334$ ,  $wR2 = 0.0877$  (all data  $R = 0.0348$ ,  $wR2 = 0.0914$ ), maximum and minimum residual electron densities;  $\Delta\rho_{\text{max}} = 0.228$ ,  $\Delta\rho_{\text{min}} = -0.218 (\text{e}\text{\AA}^{-3})$ .

The crystallographic data for **2a** was deposited in the Cambridge Crystallographic Data Centre (CCDC deposition numbers: 1904732). The data can be obtained freely from the Cambridge Crystallographic Data Centre by visiting sites of [www.ccdc.cam.ac.uk/conts/retrieving.html](http://www.ccdc.cam.ac.uk/conts/retrieving.html).

## 5. References:

- (1) Cai, S.; Lin, S.; Yi, X.; Xi, C. *J. Org. Chem.* **2017**, *82*, 512.
- (2) Coogan, M. P.; Ooi, L.; Pertusati, F. *Org. Biomol. Chem.* **2005**, *3*, 1134.
- (3) Bruker (2016). *APEX2, SAINT and SADABS*. Bruker AXS Inc., Madison, Wisconsin, USA.
- (4) G. M. Sheldrick, *Acta Crystallogr.*, 2008, **A64**, 112.
- (5) L. J. Farrugia, *J. Appl. Cryst.* 1997, **30**, 565.

## 6. Copies of HPLC Chromatograms:

### HPLC of 2a

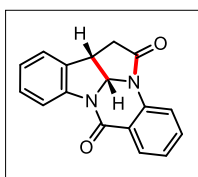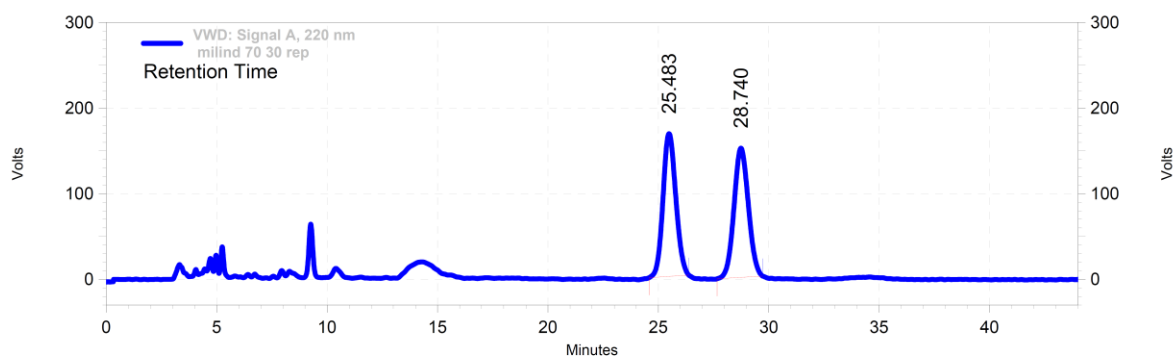

#### VWD: Signal A, 220 nm Results

| Retention Time | Area      | Area % | Height  | Height % |
|----------------|-----------|--------|---------|----------|
| 25.483         | 113108711 | 49.68  | 2797384 | 52.49    |
| 28.740         | 114575458 | 50.32  | 2532288 | 47.51    |

|        |           |        |         |        |
|--------|-----------|--------|---------|--------|
| Totals | 227684169 | 100.00 | 5329672 | 100.00 |
|--------|-----------|--------|---------|--------|

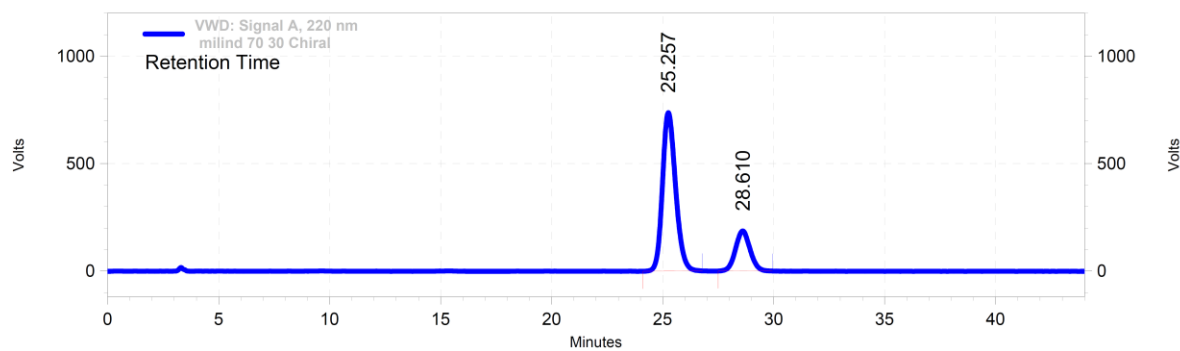

#### VWD: Signal A, 220 nm Results

| Retention Time | Area      | Area % | Height   | Height % |
|----------------|-----------|--------|----------|----------|
| 25.257         | 509522563 | 78.18  | 12362990 | 79.83    |
| 28.610         | 142209070 | 21.82  | 3124585  | 20.17    |

|        |           |        |          |        |
|--------|-----------|--------|----------|--------|
| Totals | 651731633 | 100.00 | 15487575 | 100.00 |
|--------|-----------|--------|----------|--------|

## HPLC of 2b

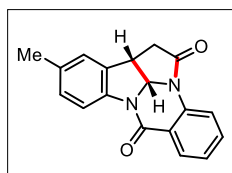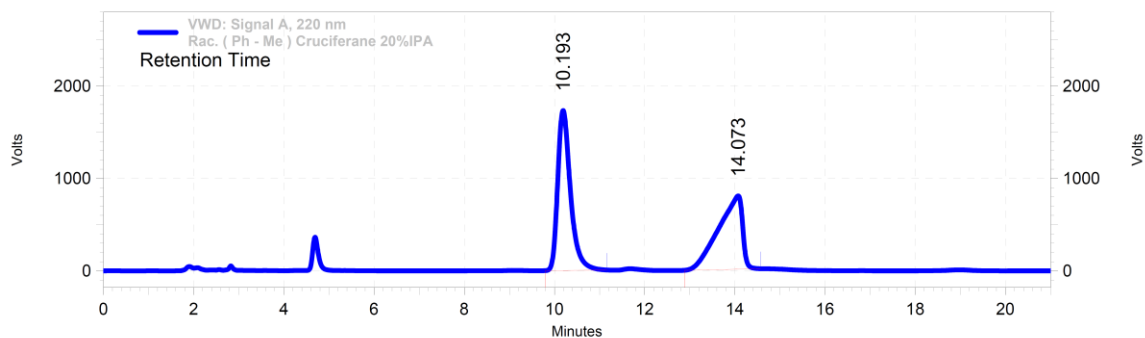

### VWD: Signal A, 220 nm Results

| Retention Time | Area       | Area % | Height   | Height % |
|----------------|------------|--------|----------|----------|
| 10.193         | 572172984  | 53.75  | 29055194 | 68.59    |
| 14.073         | 492306617  | 46.25  | 13307758 | 31.41    |
| Totals         | 1064479601 | 100.00 | 42362952 | 100.00   |

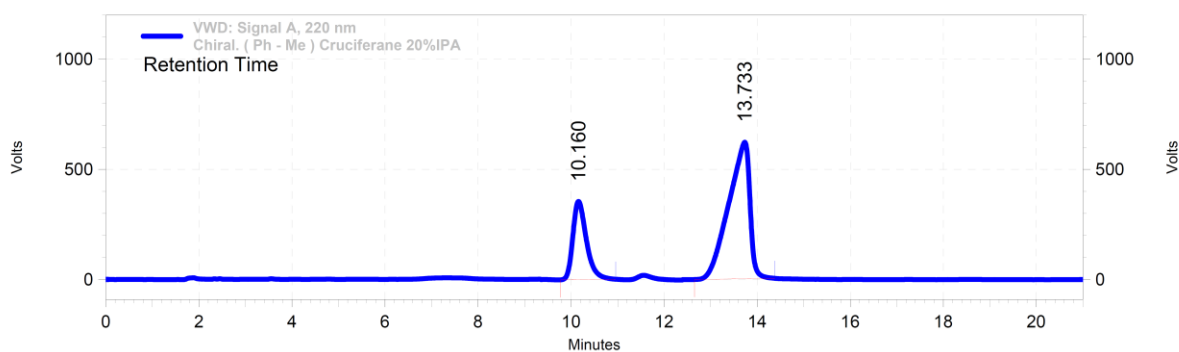

### VWD: Signal A, 220 nm Results

| Retention Time | Area      | Area % | Height   | Height % |
|----------------|-----------|--------|----------|----------|
| 10.160         | 120676830 | 26.74  | 5955494  | 36.42    |
| 13.733         | 330606335 | 73.26  | 10398877 | 63.58    |
| Totals         | 451283165 | 100.00 | 16354371 | 100.00   |



## HPLC of 2c

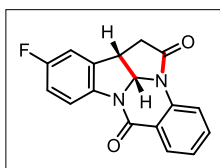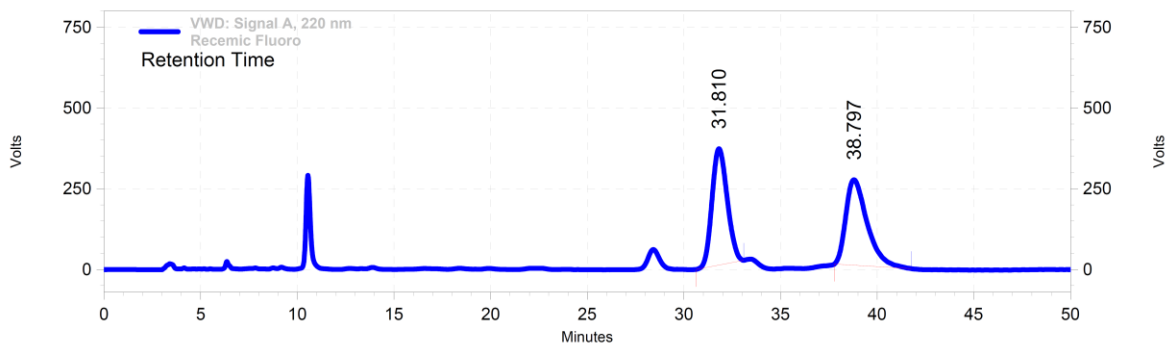

### VWD: Signal A, 220 nm Results

| Retention Time | Area      | Area % | Height  | Height % |
|----------------|-----------|--------|---------|----------|
| 31.810         | 332582978 | 49.35  | 6039809 | 57.65    |
| 38.797         | 341411305 | 50.65  | 4436192 | 42.35    |

| Totals | Area      | Area % | Height   | Height % |
|--------|-----------|--------|----------|----------|
|        | 673994283 | 100.00 | 10476001 | 100.00   |

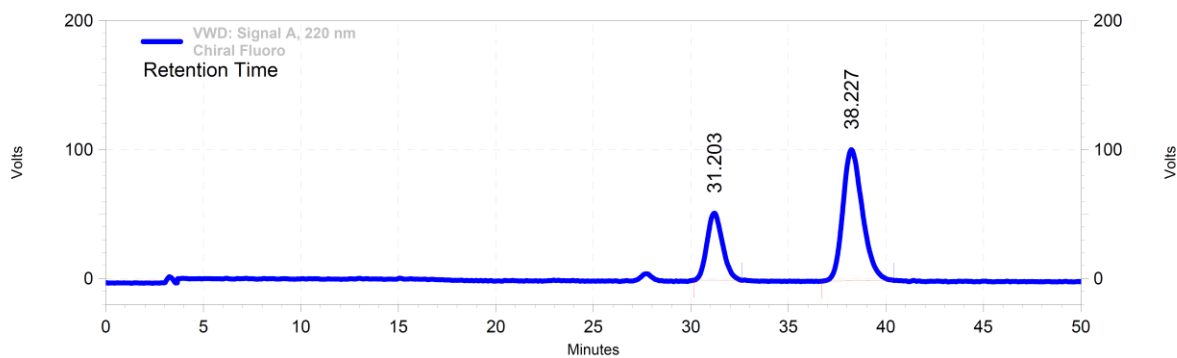

### VWD: Signal A, 220 nm Results

| Retention Time | Area      | Area % | Height  | Height % |
|----------------|-----------|--------|---------|----------|
| 31.203         | 48303901  | 28.80  | 871099  | 33.80    |
| 38.227         | 119428546 | 71.20  | 1705864 | 66.20    |

| Totals | Area      | Area % | Height  | Height % |
|--------|-----------|--------|---------|----------|
|        | 167732447 | 100.00 | 2576963 | 100.00   |

## HPLC of 2d

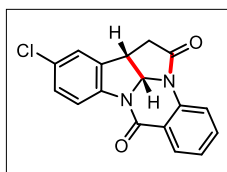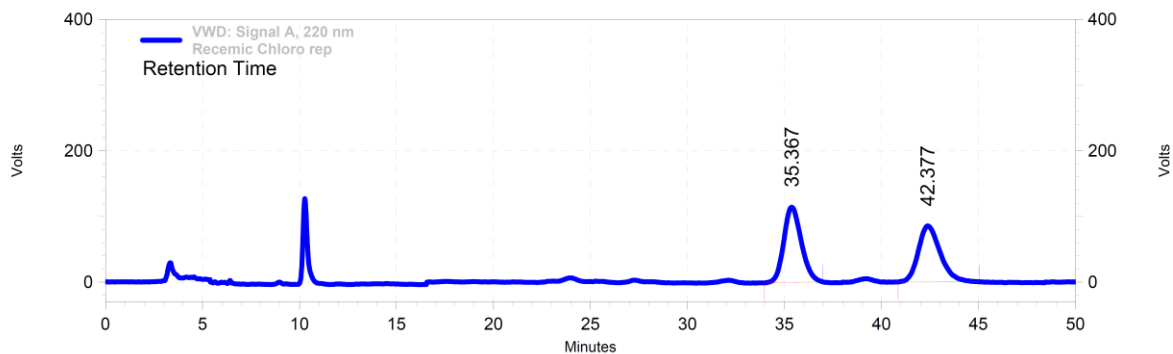

### VWD: Signal A, 220 nm Results

| Retention Time | Area      | Area % | Height  | Height % |
|----------------|-----------|--------|---------|----------|
| 35.367         | 121134431 | 51.86  | 1919871 | 57.32    |
| 42.377         | 112429955 | 48.14  | 1429277 | 42.68    |

|        |           |        |         |        |
|--------|-----------|--------|---------|--------|
| Totals | 233564386 | 100.00 | 3349148 | 100.00 |
|--------|-----------|--------|---------|--------|

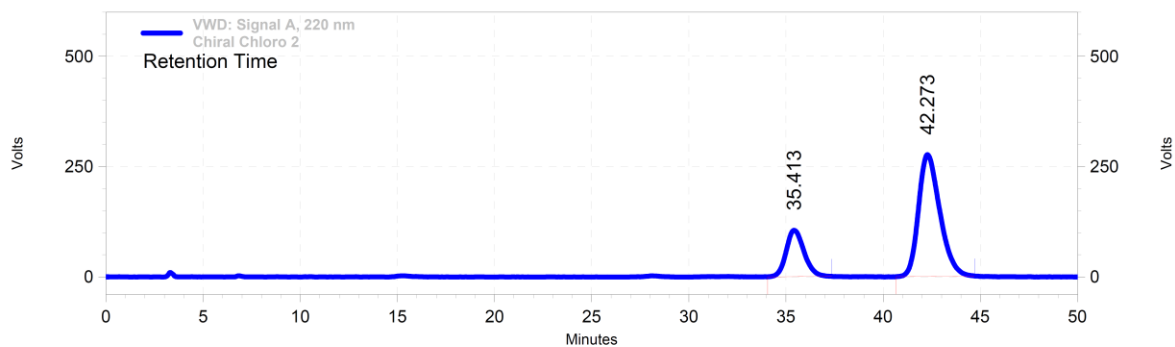

### VWD: Signal A, 220 nm Results

| Retention Time | Area      | Area % | Height  | Height % |
|----------------|-----------|--------|---------|----------|
| 35.413         | 112714445 | 24.13  | 1761060 | 27.54    |
| 42.273         | 354379463 | 75.87  | 4632485 | 72.46    |

|        |           |        |         |        |
|--------|-----------|--------|---------|--------|
| Totals | 467093908 | 100.00 | 6393545 | 100.00 |
|--------|-----------|--------|---------|--------|

## HPLC of 2e

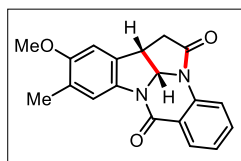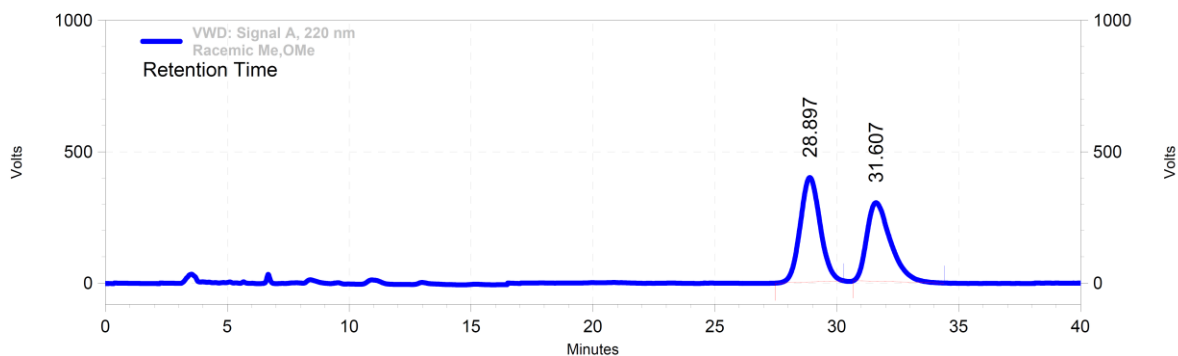

### VWD: Signal A, 220 nm Results

| Retention Time | Area      | Area % | Height  | Height % |
|----------------|-----------|--------|---------|----------|
| 28.897         | 378254300 | 52.65  | 6667399 | 57.06    |
| 31.607         | 340152122 | 47.35  | 5017819 | 42.94    |

| Totals | Area      | Area % | Height   | Height % |
|--------|-----------|--------|----------|----------|
|        | 718406422 | 100.00 | 11685218 | 100.00   |

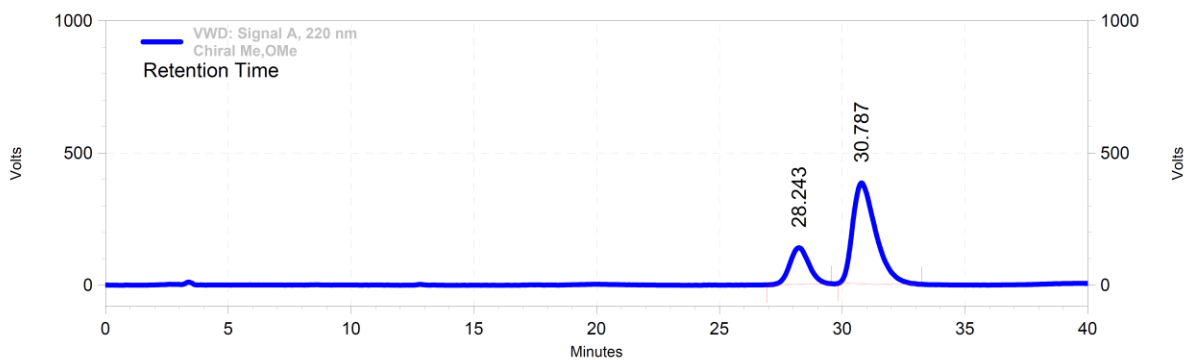

### VWD: Signal A, 220 nm Results

| Retention Time | Area      | Area % | Height  | Height % |
|----------------|-----------|--------|---------|----------|
| 28.243         | 126498039 | 23.25  | 2316045 | 26.60    |
| 30.787         | 417509164 | 76.75  | 6391685 | 73.40    |

| Totals | Area      | Area % | Height  | Height % |
|--------|-----------|--------|---------|----------|
|        | 544007203 | 100.00 | 8707730 | 100.00   |

## HPLC of 2f

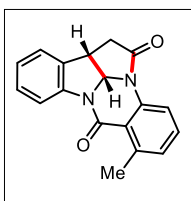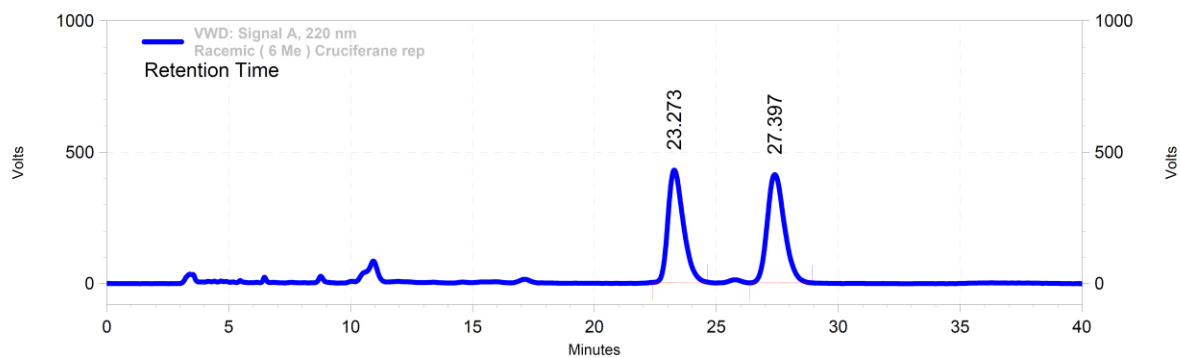

### VWD: Signal A, 220 nm Results

| Retention Time | Area      | Area % | Height  | Height % |
|----------------|-----------|--------|---------|----------|
| 23.273         | 313139877 | 48.04  | 7168274 | 50.89    |
| 27.397         | 338652716 | 51.96  | 6916655 | 49.11    |

| Totals | Area      | Area % | Height   | Height % |
|--------|-----------|--------|----------|----------|
|        | 651792593 | 100.00 | 14084929 | 100.00   |

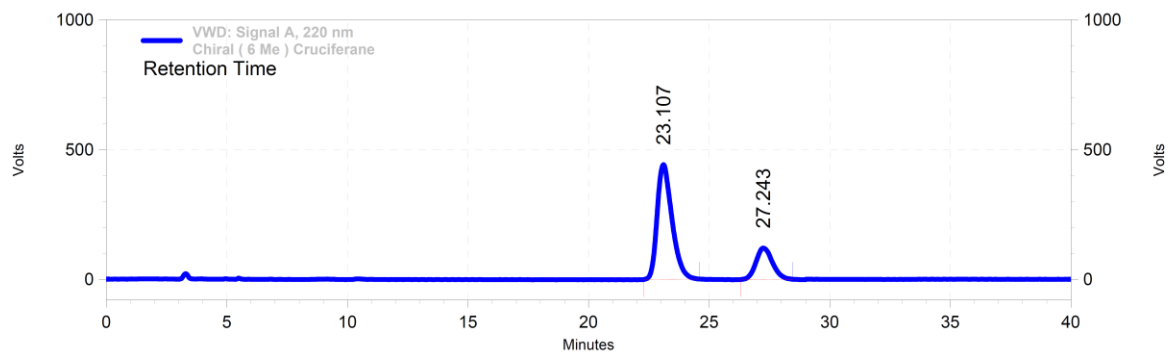

### VWD: Signal A, 220 nm Results

| Retention Time | Area      | Area % | Height  | Height % |
|----------------|-----------|--------|---------|----------|
| 23.107         | 318033275 | 76.73  | 7416975 | 78.54    |
| 27.243         | 96425787  | 23.27  | 2026098 | 21.46    |

| Totals | Area      | Area % | Height  | Height % |
|--------|-----------|--------|---------|----------|
|        | 414459062 | 100.00 | 9443073 | 100.00   |

## HPLC of 2g

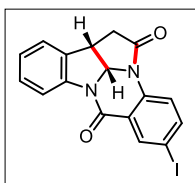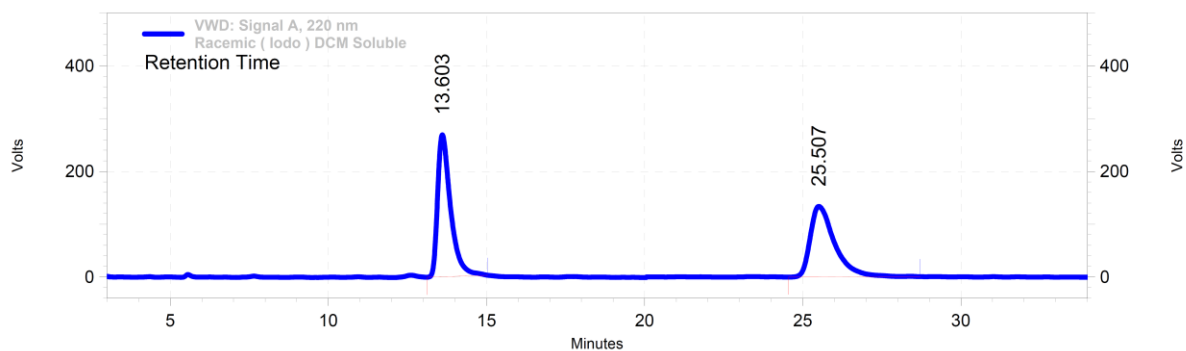

### VWD: Signal A, 220 nm Results

| Retention Time | Area      | Area % | Height  | Height % |
|----------------|-----------|--------|---------|----------|
| 13.603         | 128867180 | 51.60  | 4504318 | 66.77    |
| 25.507         | 120855439 | 48.40  | 2241883 | 33.23    |

| Totals | Area      | Area % | Height  | Height % |
|--------|-----------|--------|---------|----------|
|        | 249722619 | 100.00 | 6746201 | 100.00   |

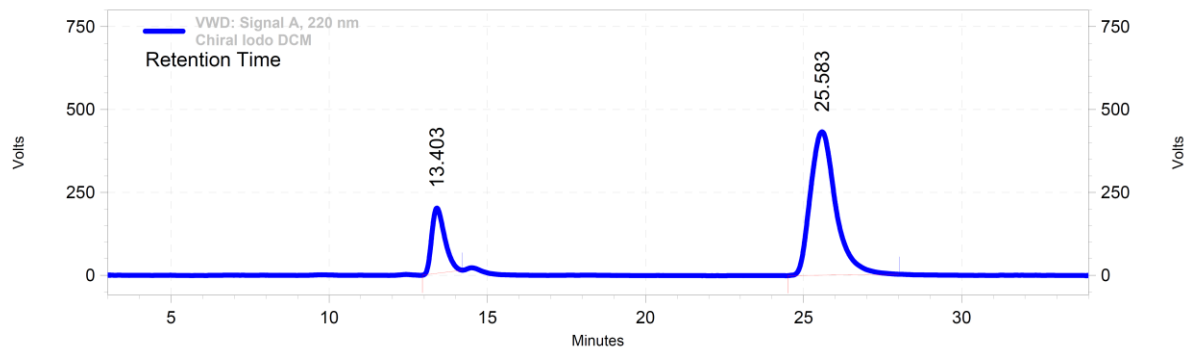

### VWD: Signal A, 220 nm Results

| Retention Time | Area      | Area % | Height  | Height % |
|----------------|-----------|--------|---------|----------|
| 13.403         | 94720591  | 19.01  | 3304888 | 31.29    |
| 25.583         | 403518644 | 80.99  | 7255736 | 68.71    |

| Totals | Area      | Area % | Height   | Height % |
|--------|-----------|--------|----------|----------|
|        | 498239235 | 100.00 | 10560624 | 100.00   |

## HPLC of 2h

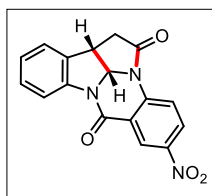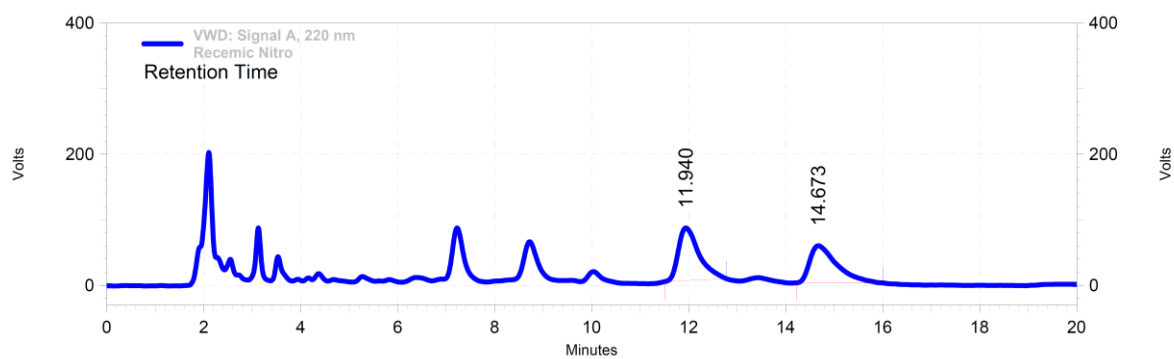

### VWD: Signal A, 220 nm Results

| Retention Time | Area     | Area % | Height  | Height % |
|----------------|----------|--------|---------|----------|
| 11.940         | 39942306 | 51.97  | 1346429 | 58.68    |
| 14.673         | 36913462 | 48.03  | 947969  | 41.32    |

| Totals | Area     | Area % | Height  | Height % |
|--------|----------|--------|---------|----------|
|        | 76855768 | 100.00 | 2294398 | 100.00   |

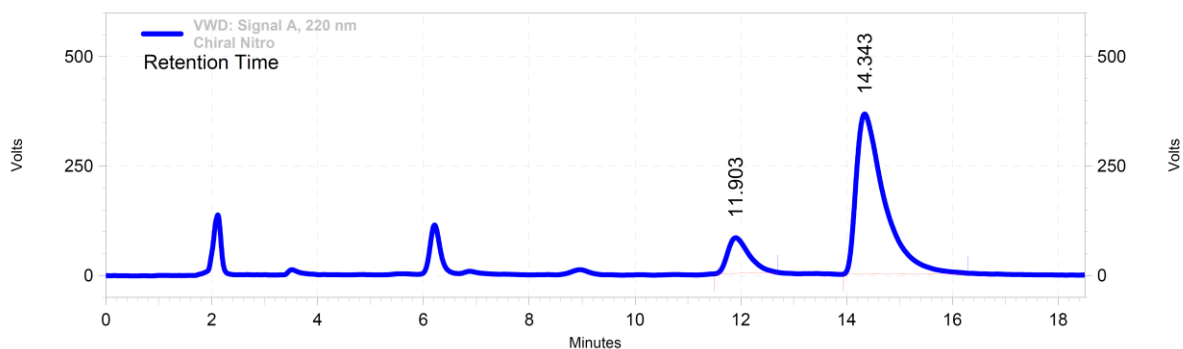

### VWD: Signal A, 220 nm Results

| Retention Time | Area      | Area % | Height  | Height % |
|----------------|-----------|--------|---------|----------|
| 11.903         | 38536242  | 14.54  | 1364054 | 18.20    |
| 14.343         | 226578595 | 85.46  | 6131395 | 81.80    |

| Totals | Area      | Area % | Height  | Height % |
|--------|-----------|--------|---------|----------|
|        | 265114837 | 100.00 | 7495449 | 100.00   |

## 7. Copies of $^1\text{H}$ NMR, $^{13}\text{C}$ , DEPT NMR Spectra

$^1\text{H}$  NMR (400 MHz,  $\text{CDCl}_3$ )

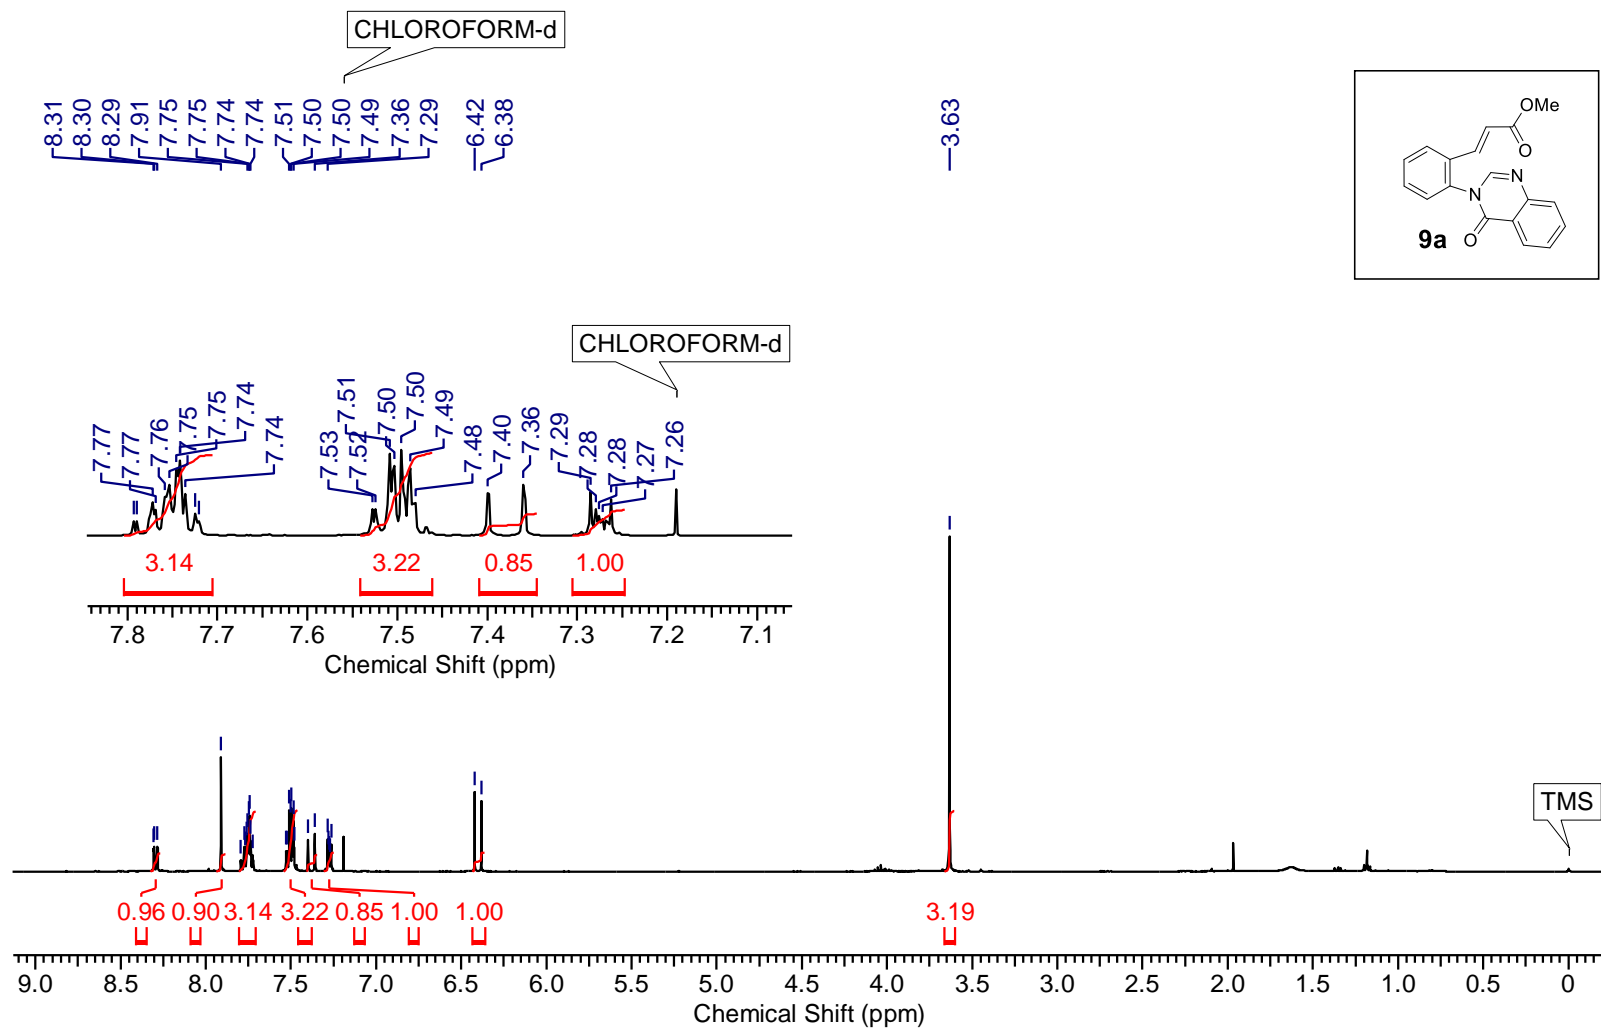

**<sup>13</sup>C NMR (100 MHz, CDCl<sub>3</sub>)**

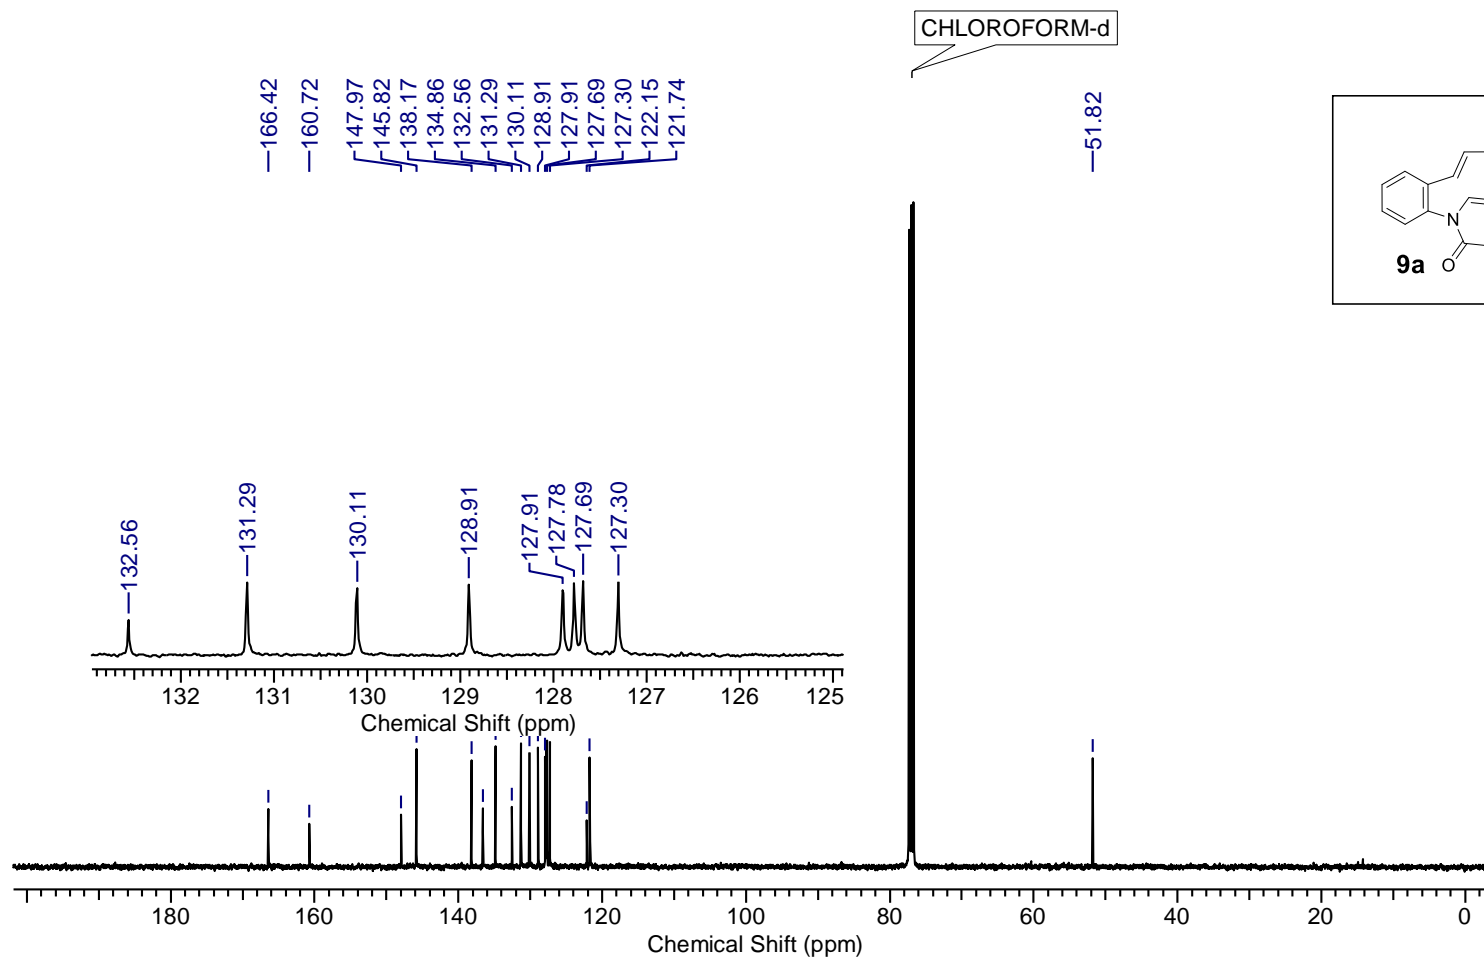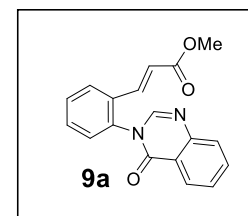



**<sup>1</sup>H NMR (400 MHz, CDCl<sub>3</sub>)**

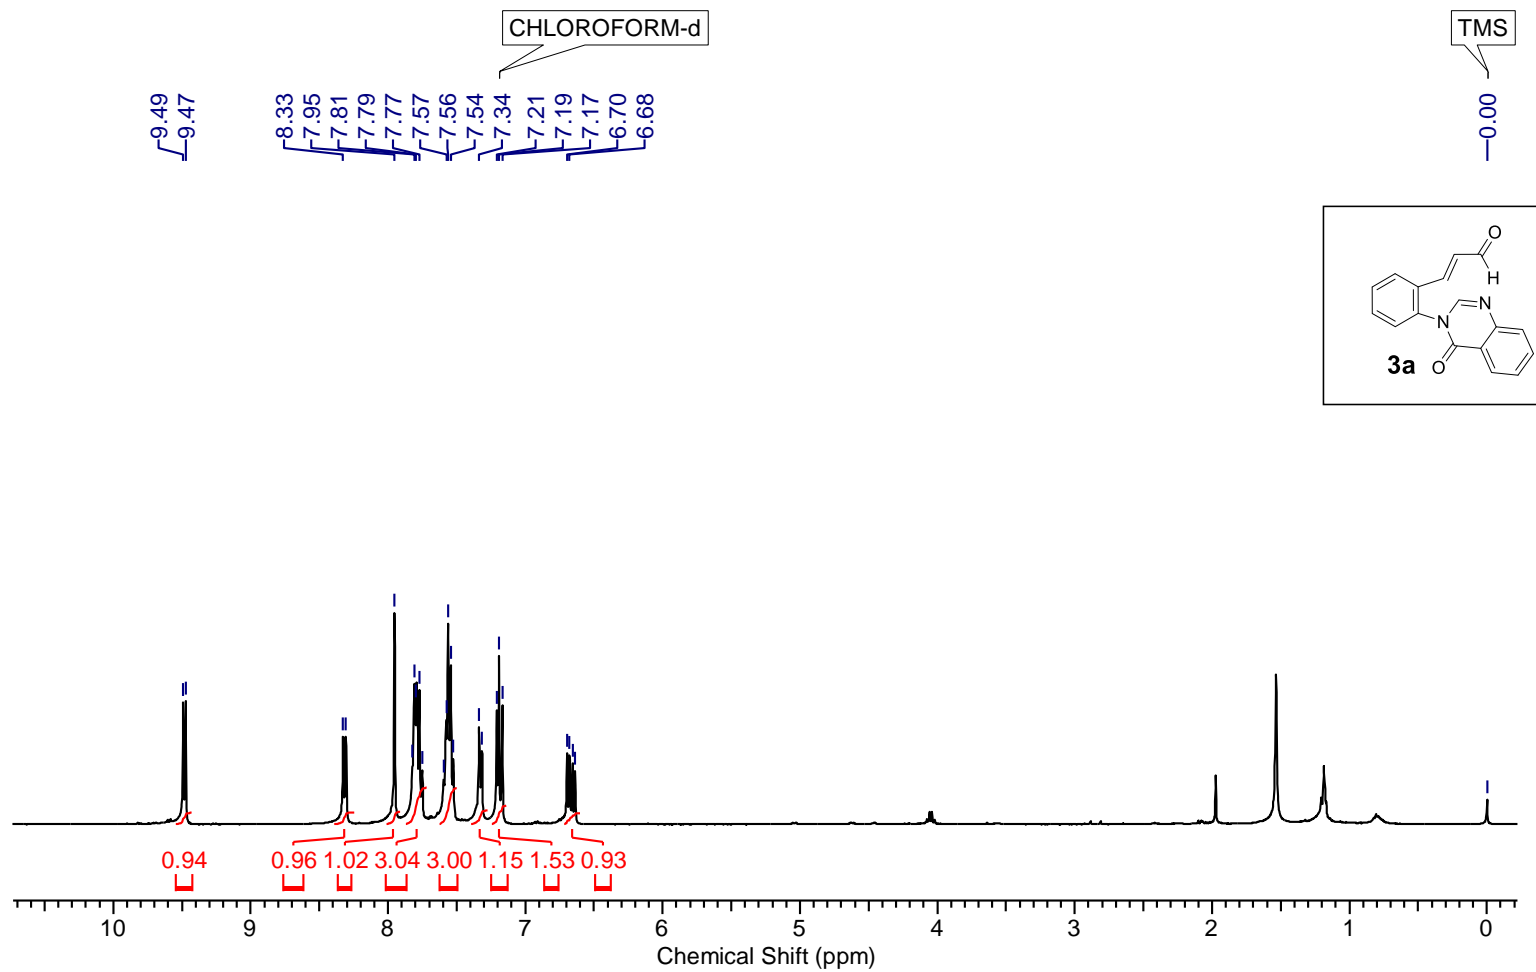

**<sup>13</sup>C NMR (100 MHz, CDCl<sub>3</sub>)**

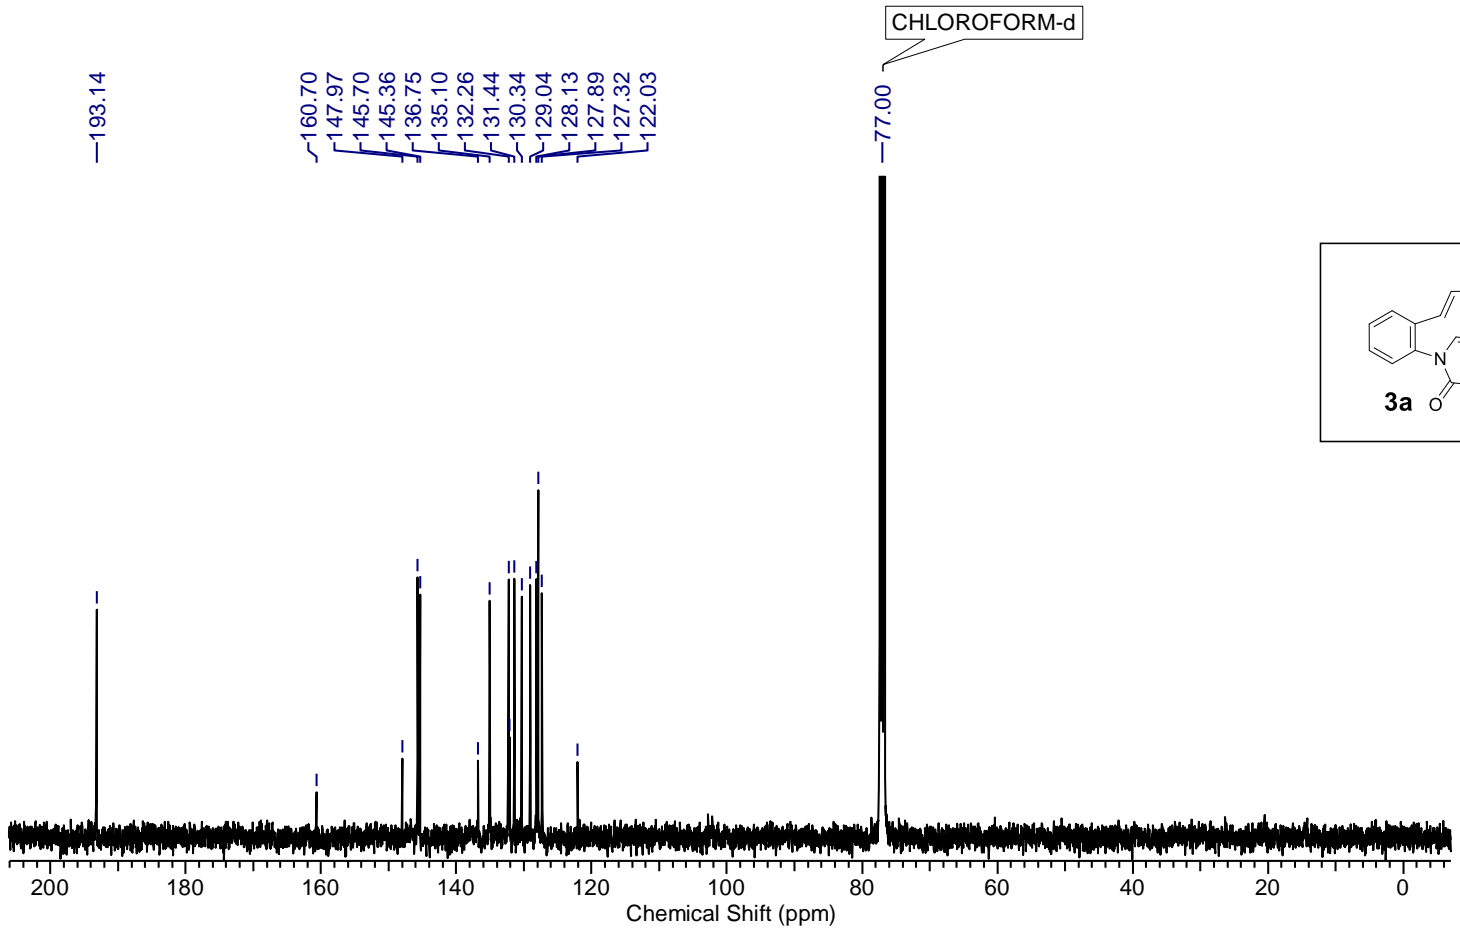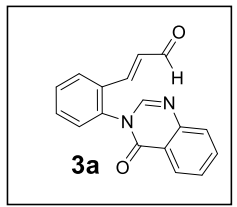

**$^1\text{H}$  NMR (400 MHz,  $\text{CDCl}_3$ )**

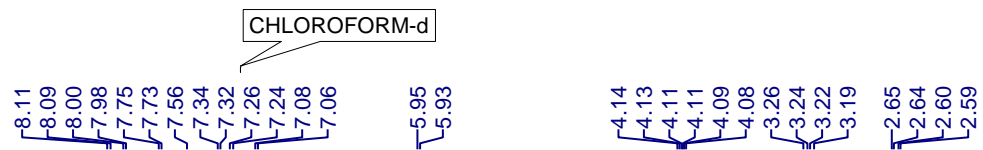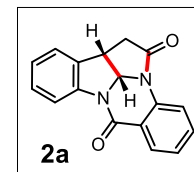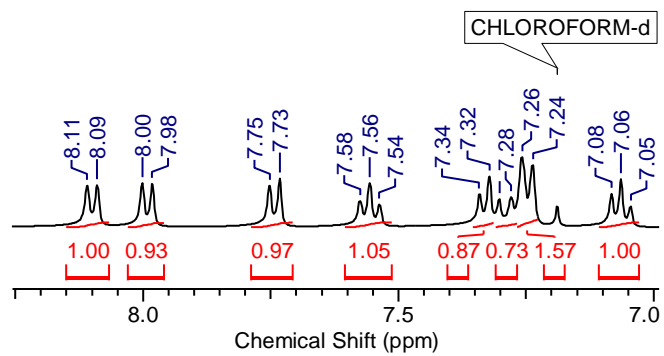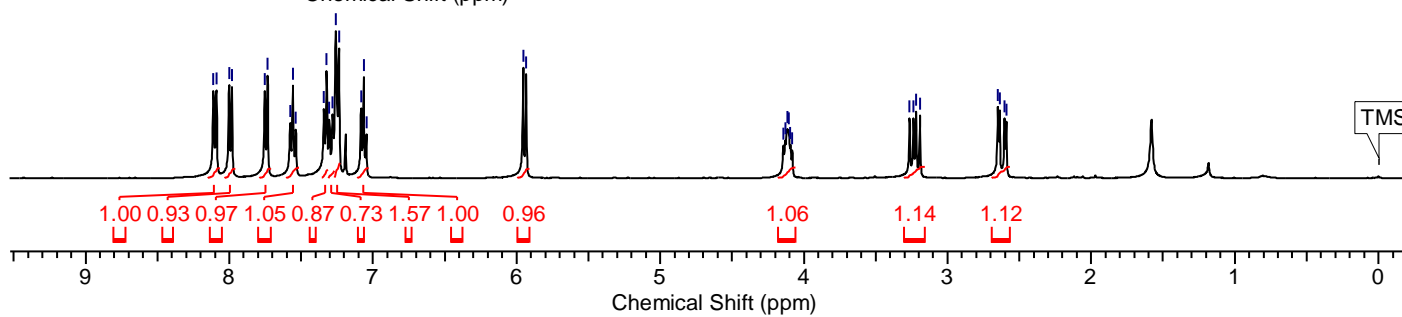

**<sup>13</sup>C NMR (100 MHz, CDCl<sub>3</sub>)**

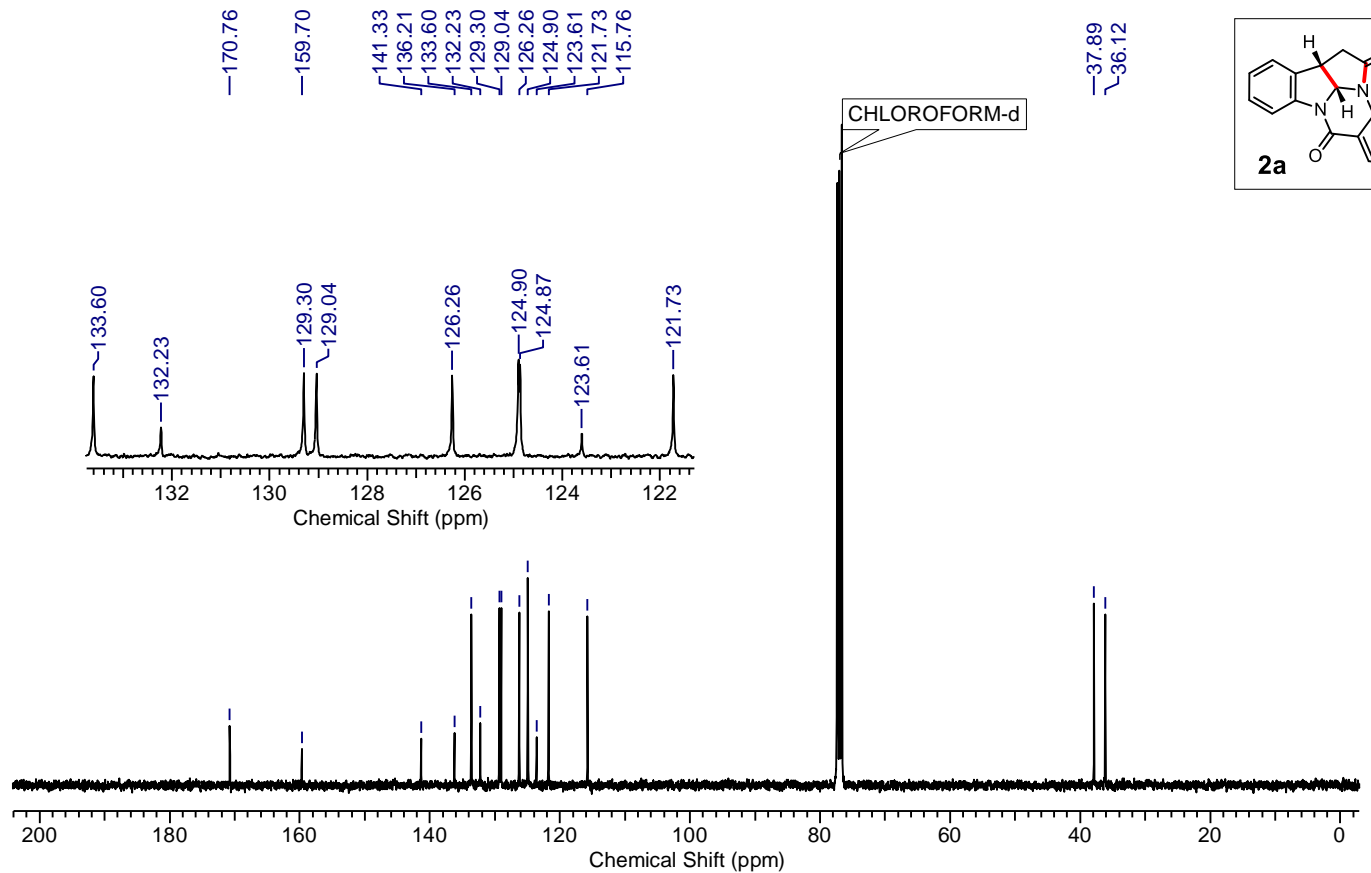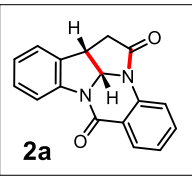

DEPT NMR

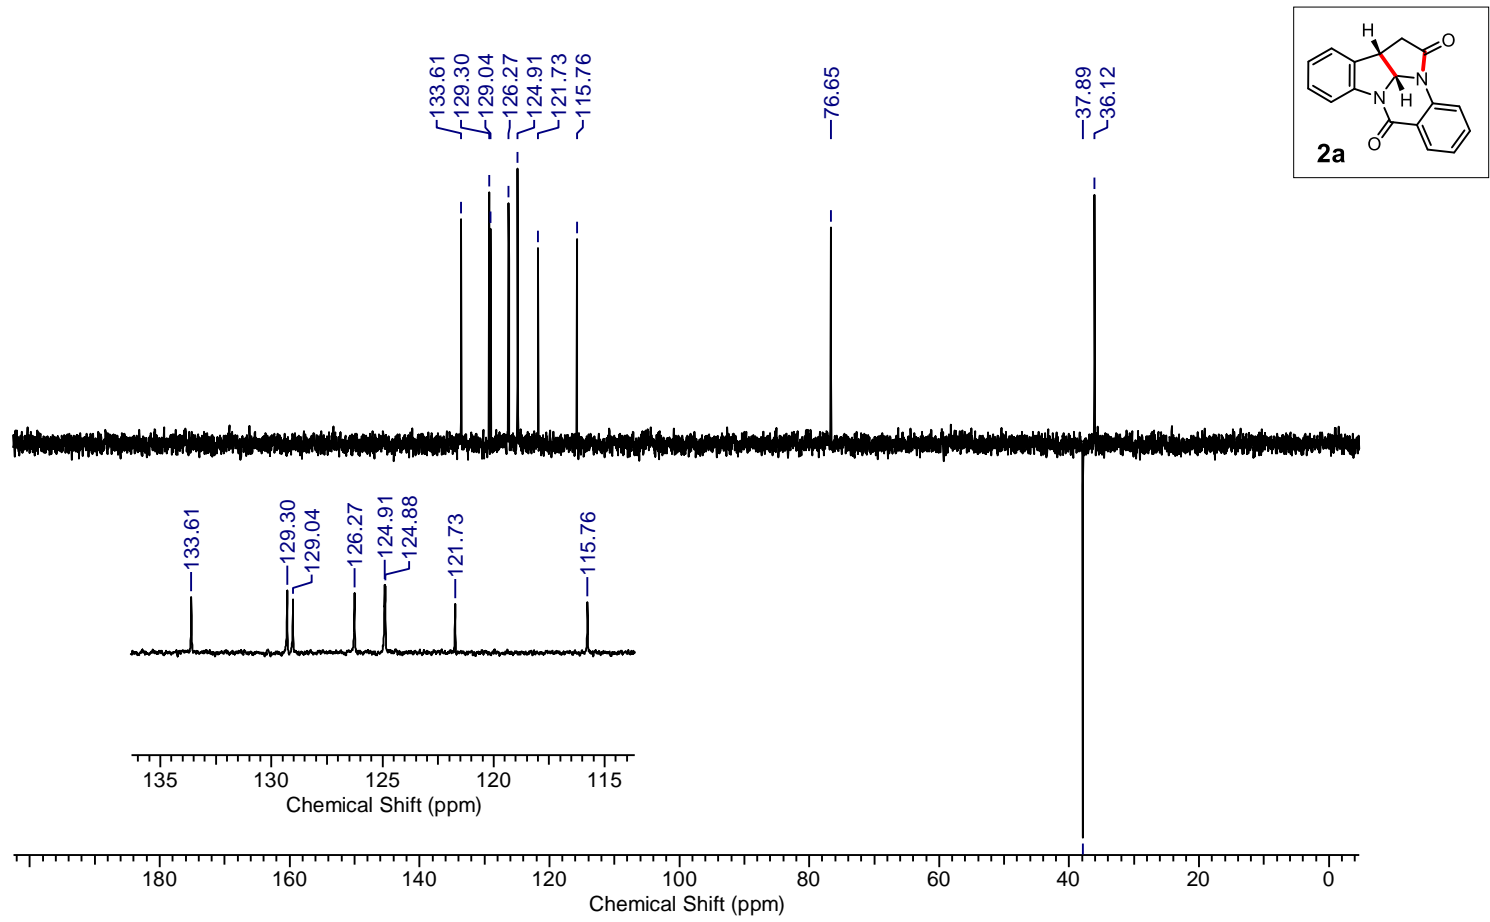

**$^1\text{H}$  NMR (500 MHz,  $\text{CDCl}_3$ )**

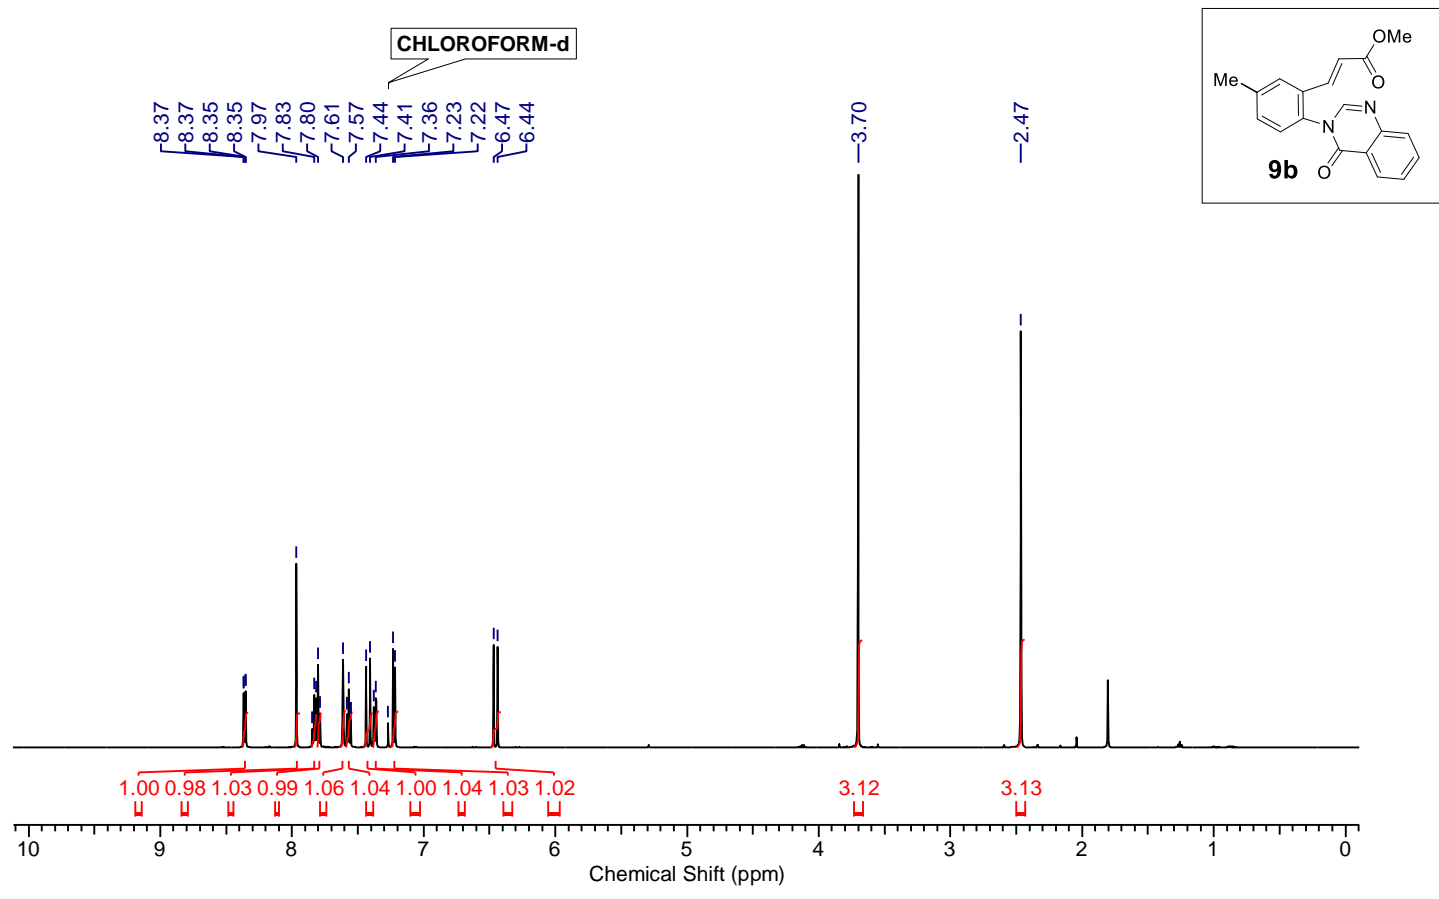

**<sup>13</sup>C NMR (125 MHz, CDCl<sub>3</sub>)**

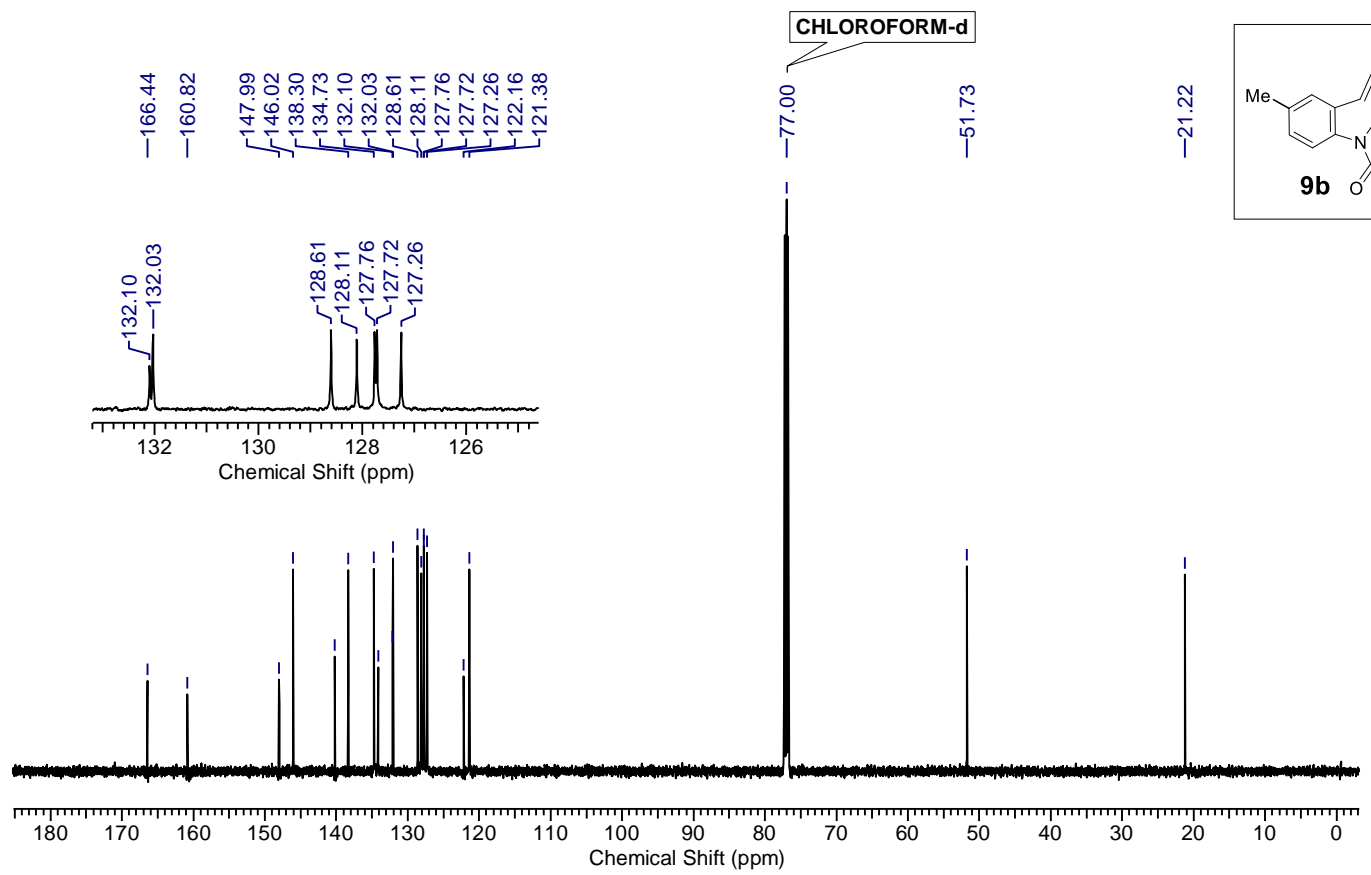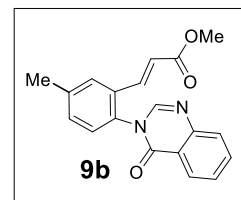

**<sup>1</sup>H NMR (500 MHz, CDCl<sub>3</sub>)**

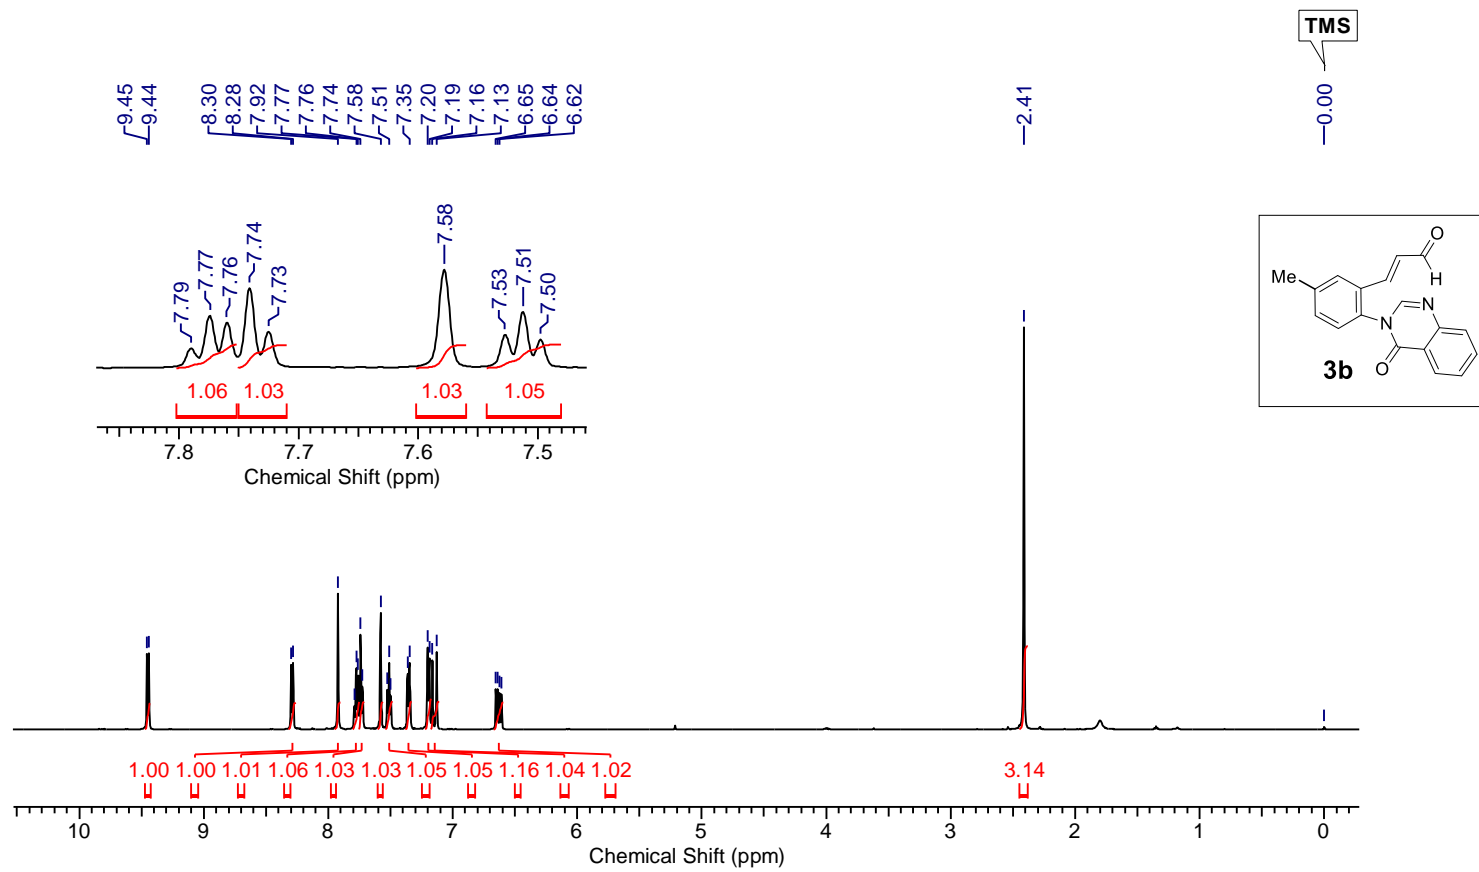



**<sup>13</sup>C NMR (125 MHz, CDCl<sub>3</sub>)**

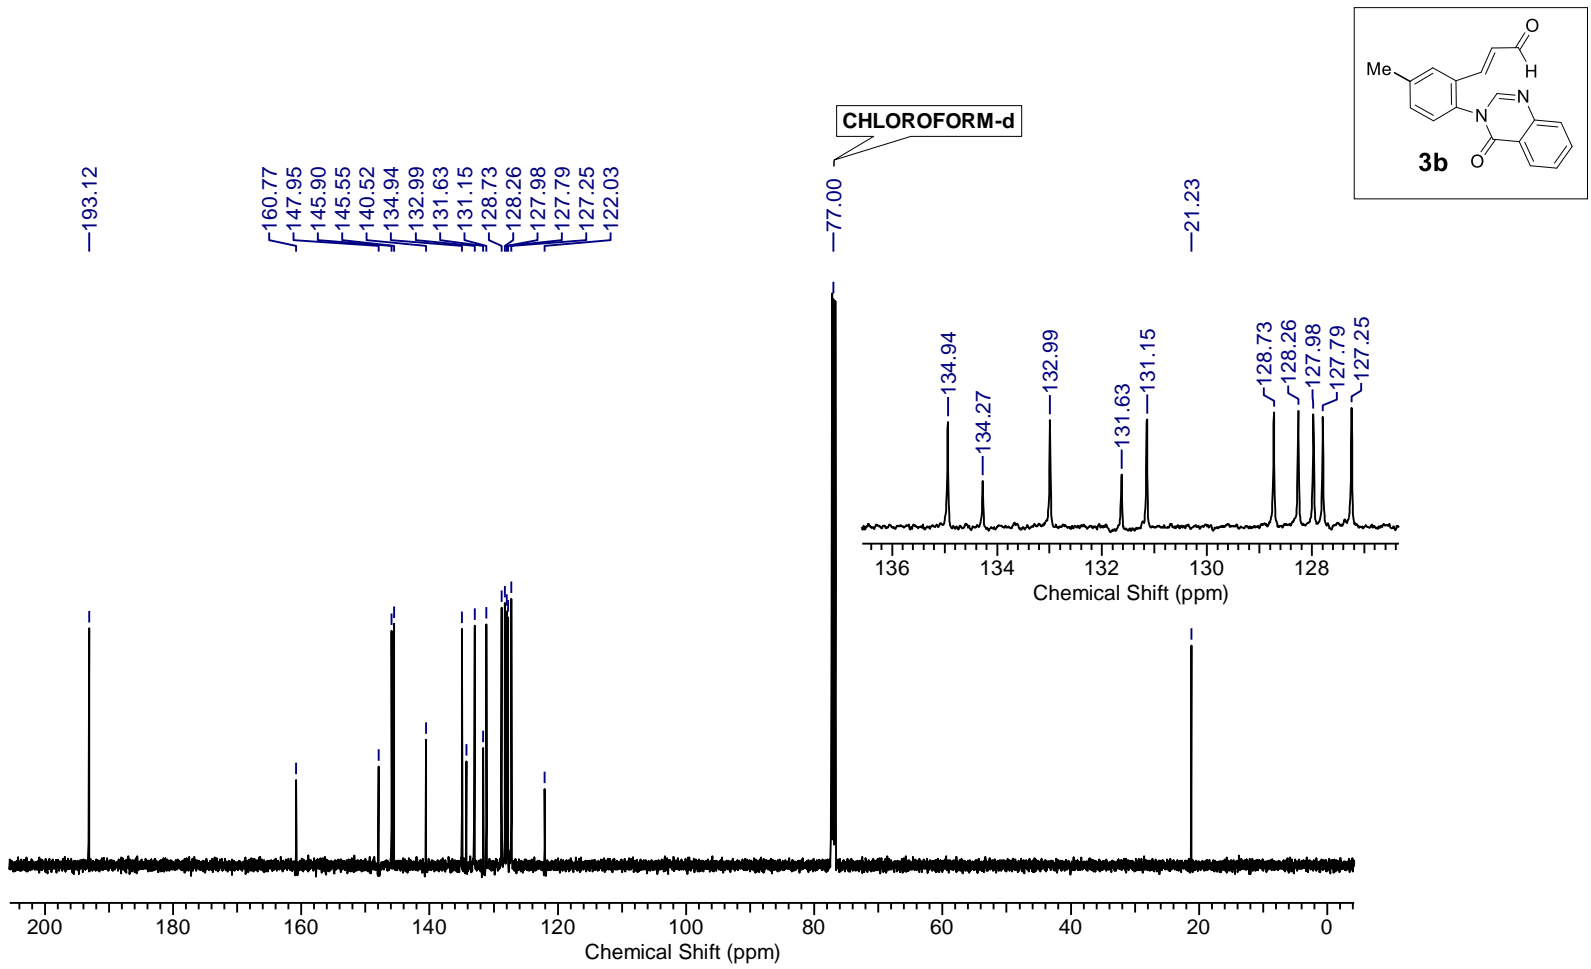

**$^1\text{H}$  NMR (500 MHz,  $\text{CDCl}_3$ )**

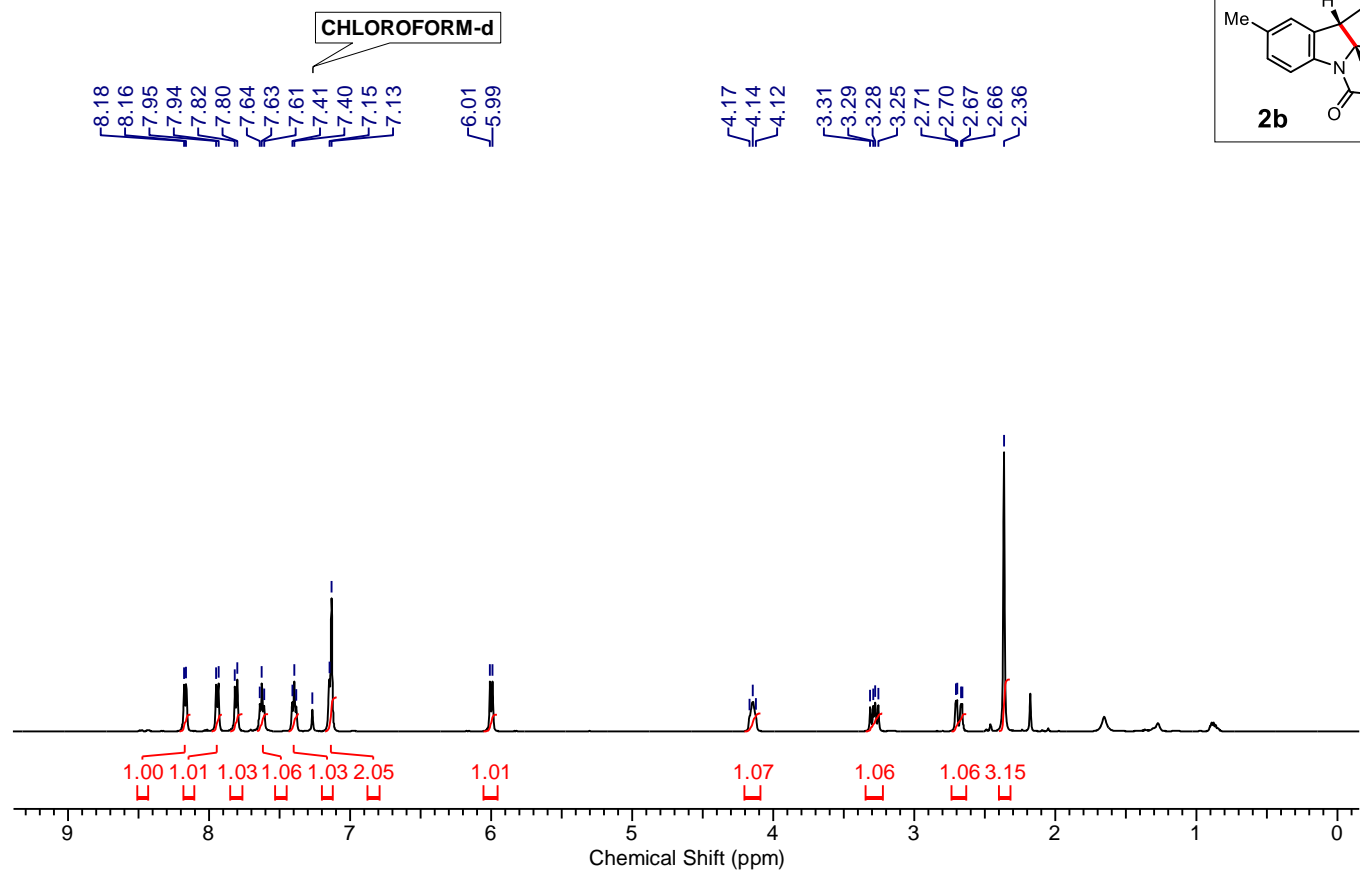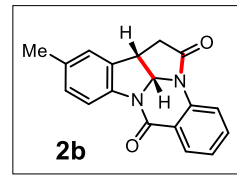

**<sup>13</sup>C NMR (125 MHz, CDCl<sub>3</sub>)**

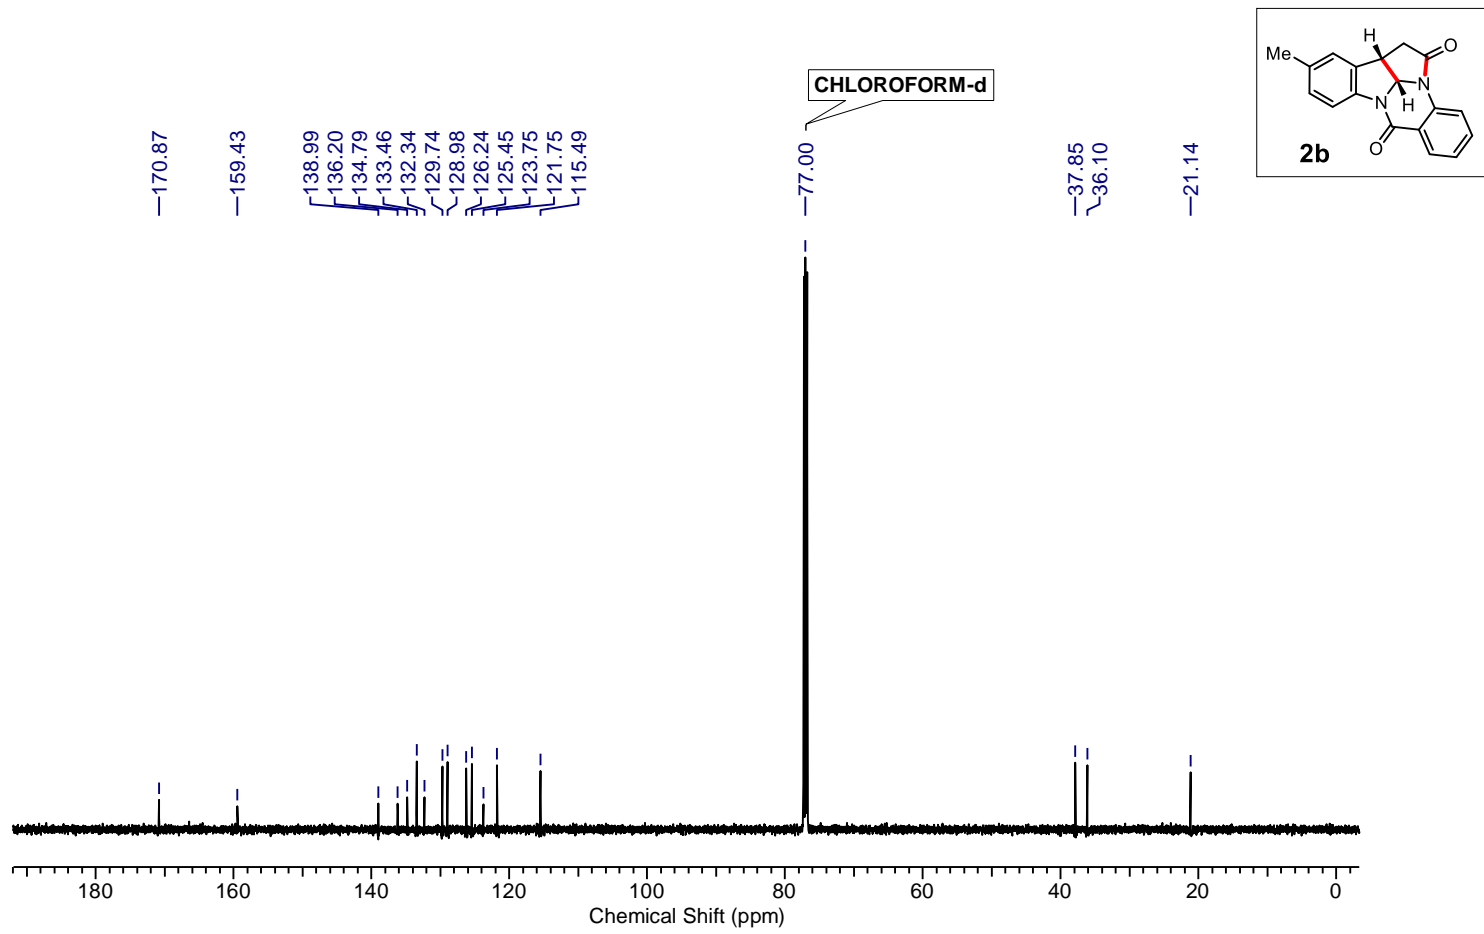

DEPT NMR

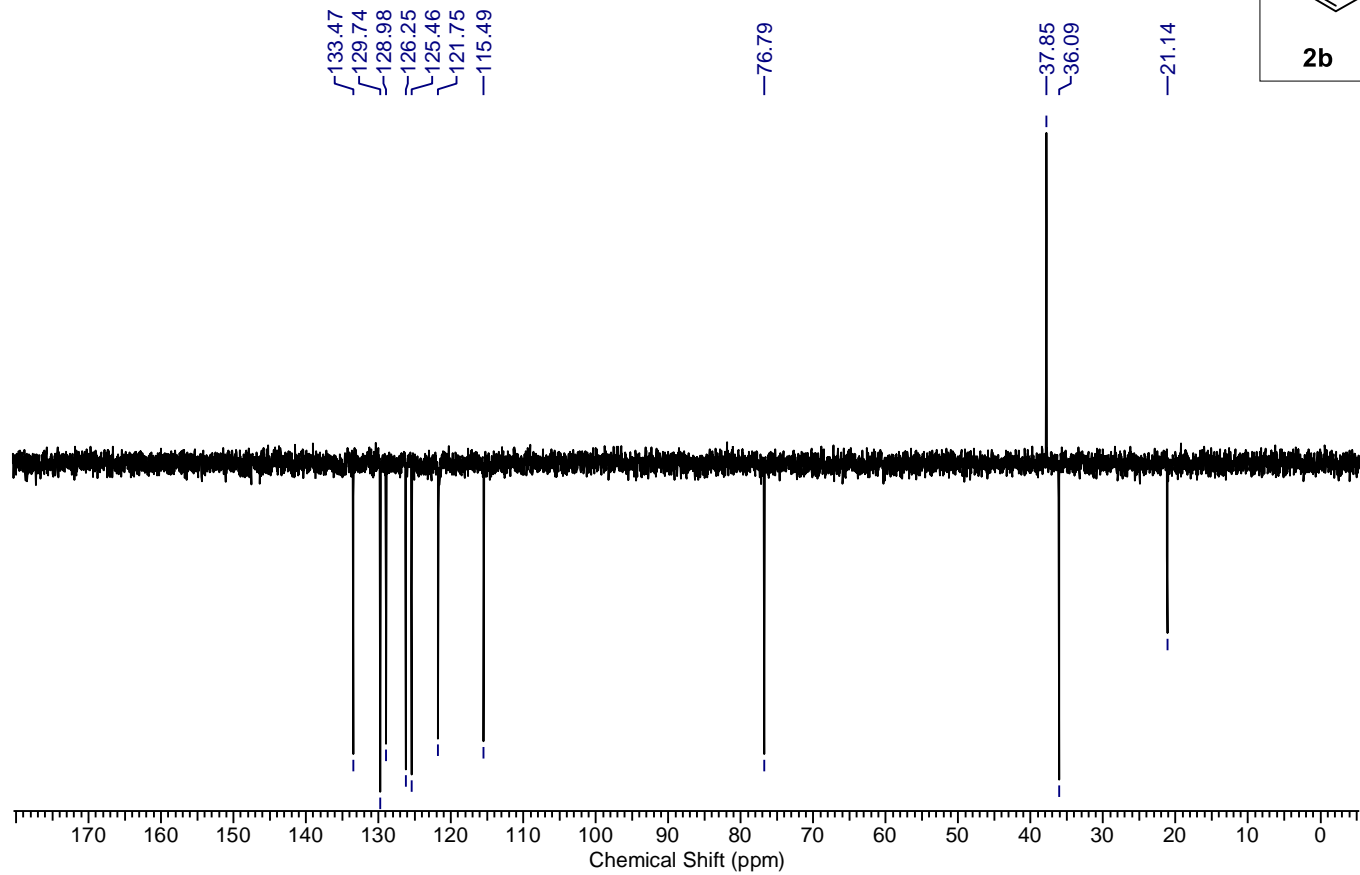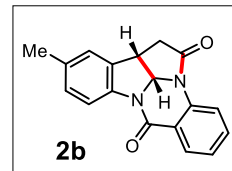

**<sup>1</sup>H NMR (400 MHz, CDCl<sub>3</sub>)**

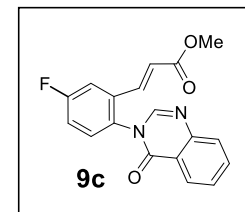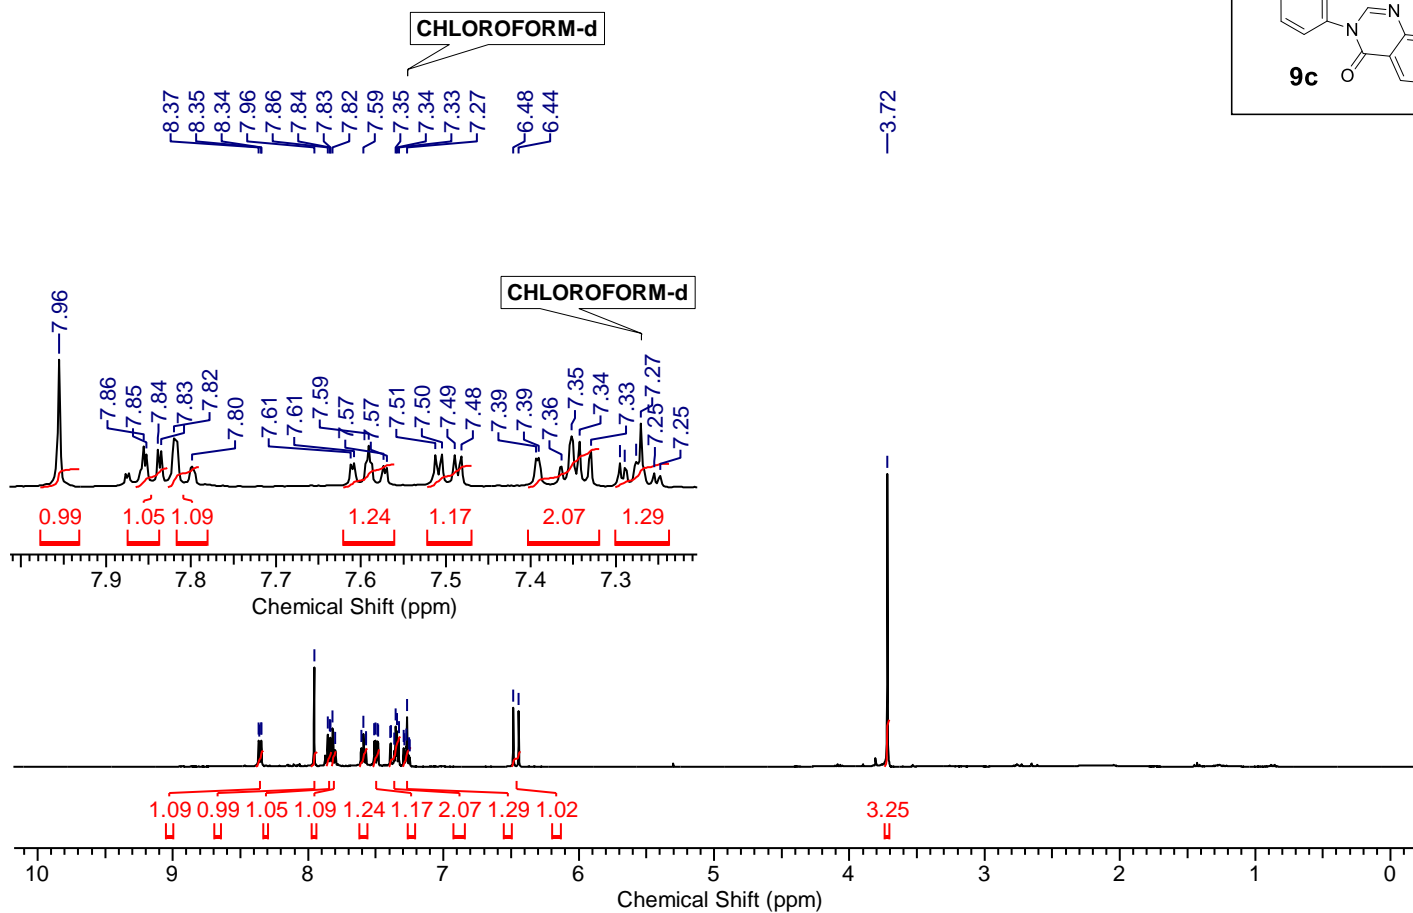

**$^{13}\text{C}$  NMR (100 MHz,  $\text{CDCl}_3$ )**

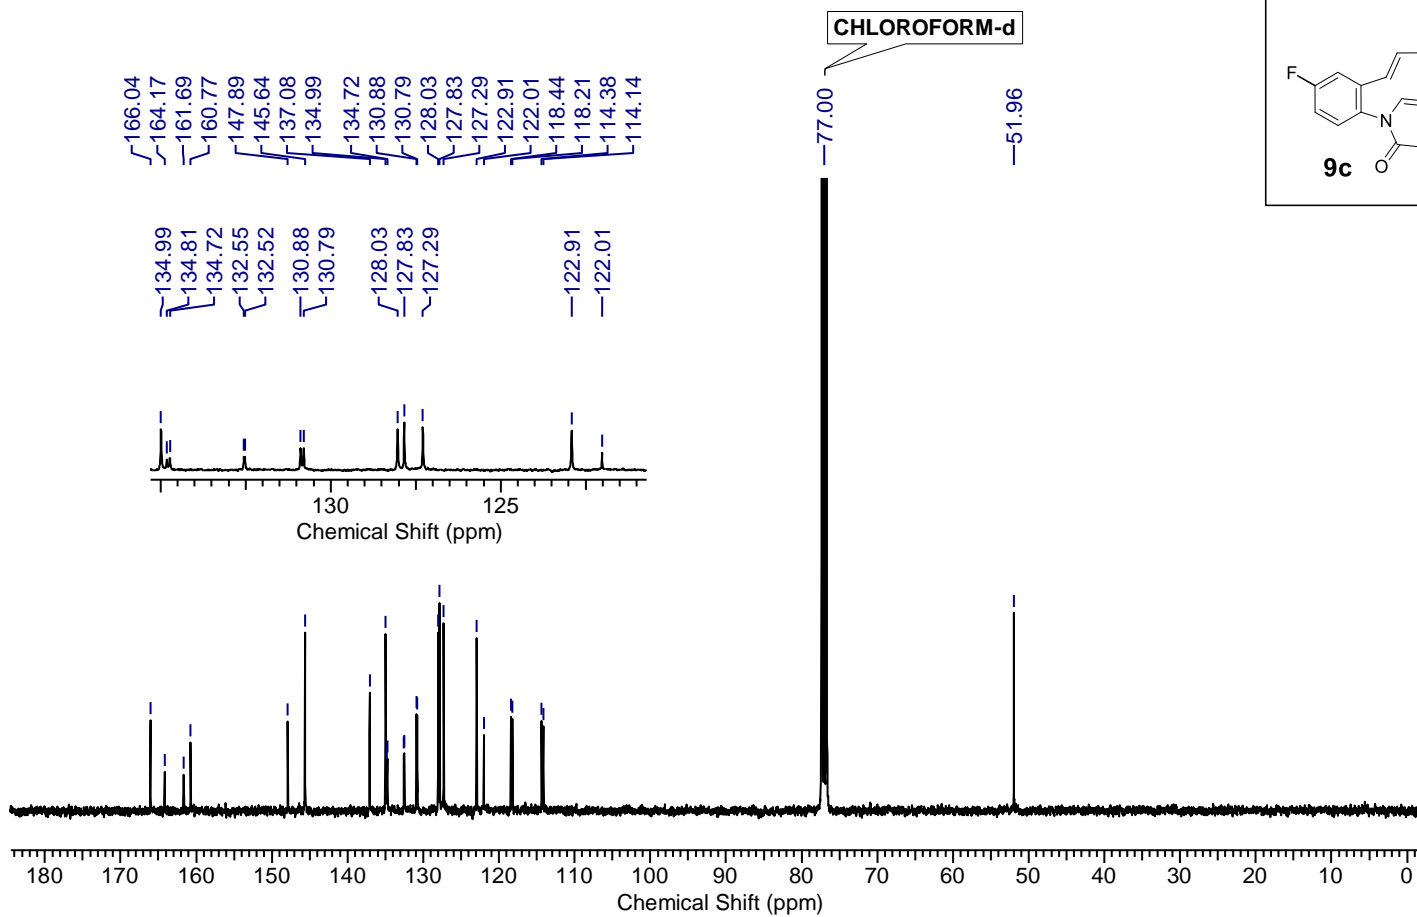

**<sup>1</sup>H NMR (500 MHz, CDCl<sub>3</sub>)**

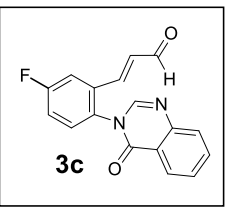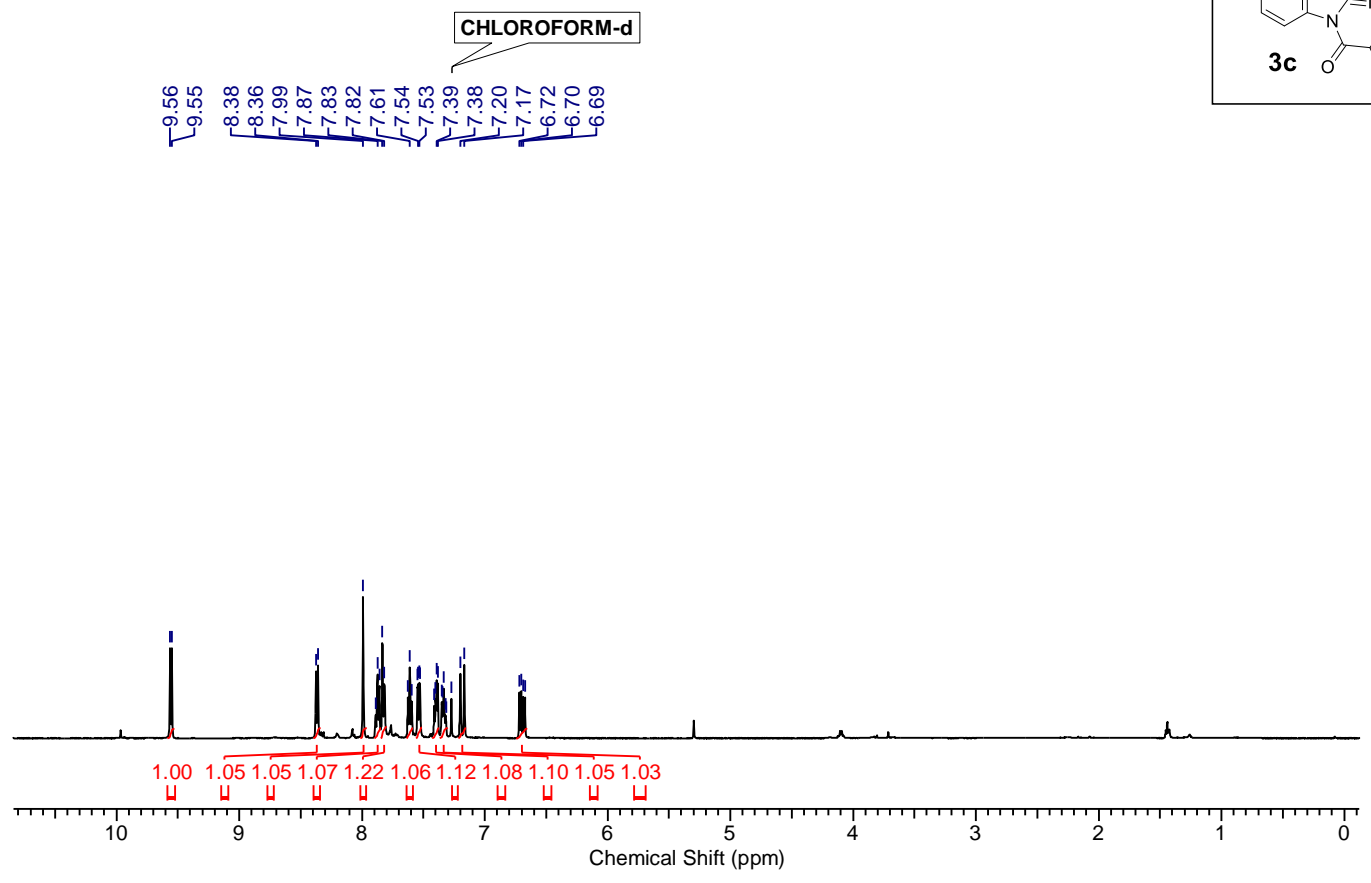

**<sup>13</sup>C NMR (125 MHz, CDCl<sub>3</sub>)**

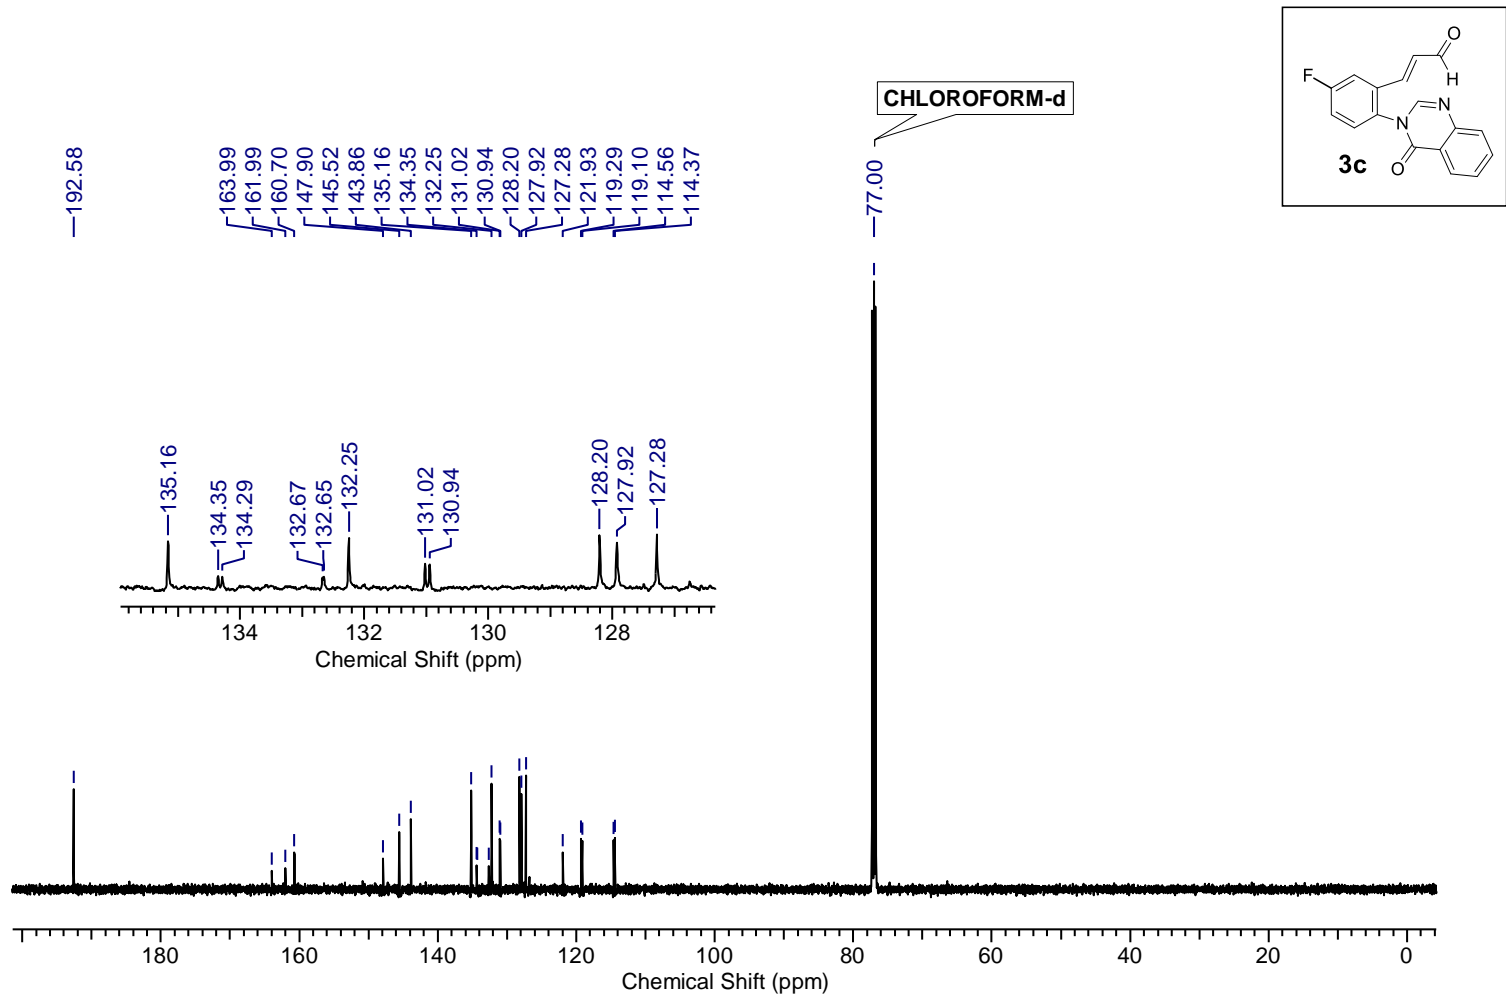



**<sup>1</sup>H NMR (400 MHz, CDCl<sub>3</sub>)**

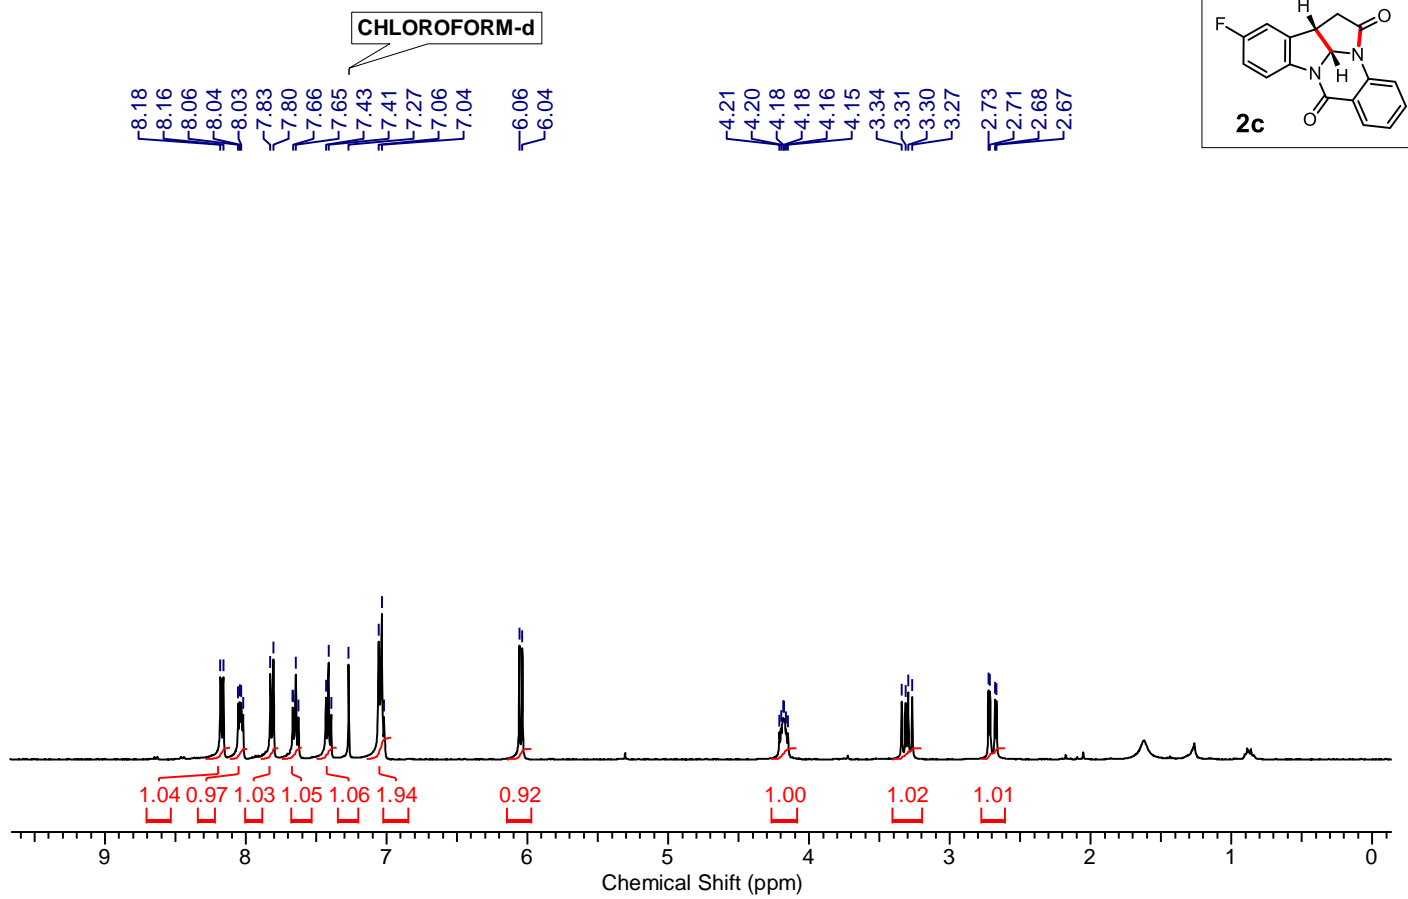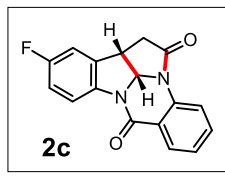

**<sup>13</sup>C NMR (100 MHz, CDCl<sub>3</sub>)**

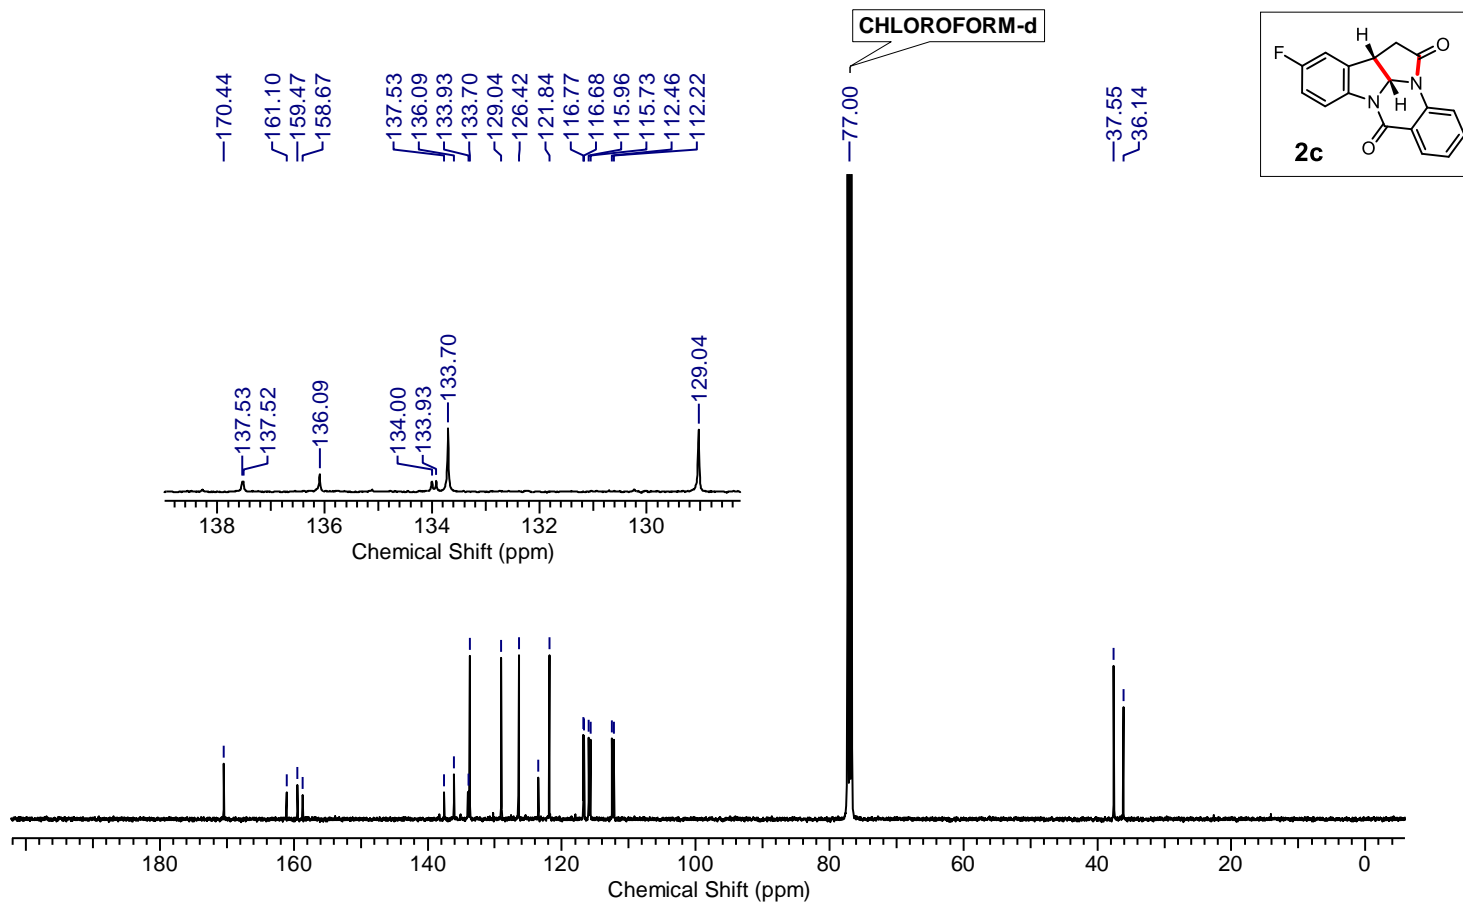

DEPT NMR

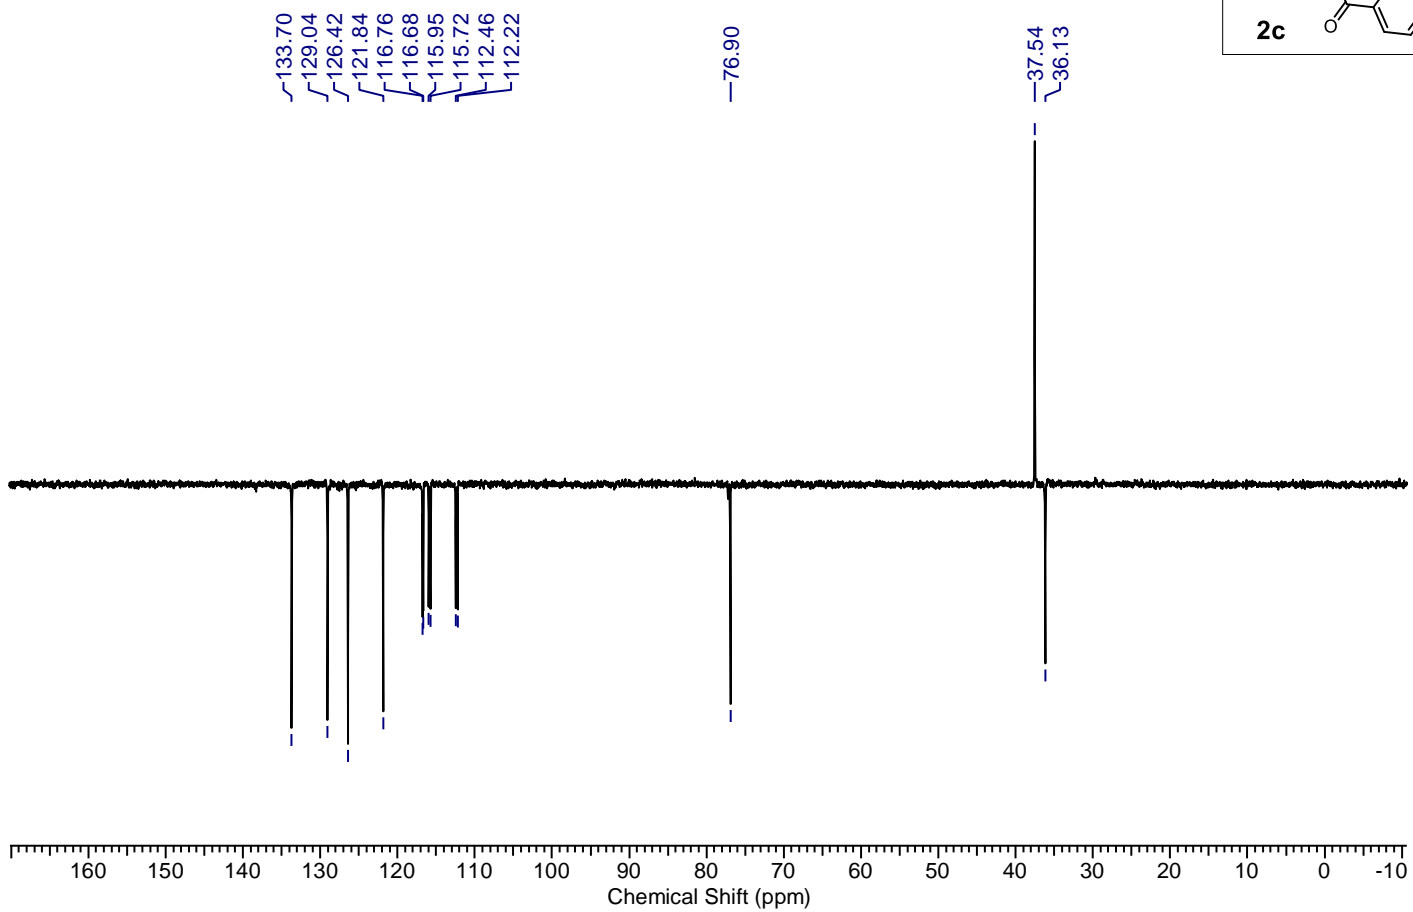

**$^1\text{H}$  NMR (400 MHz,  $\text{CDCl}_3$ )**

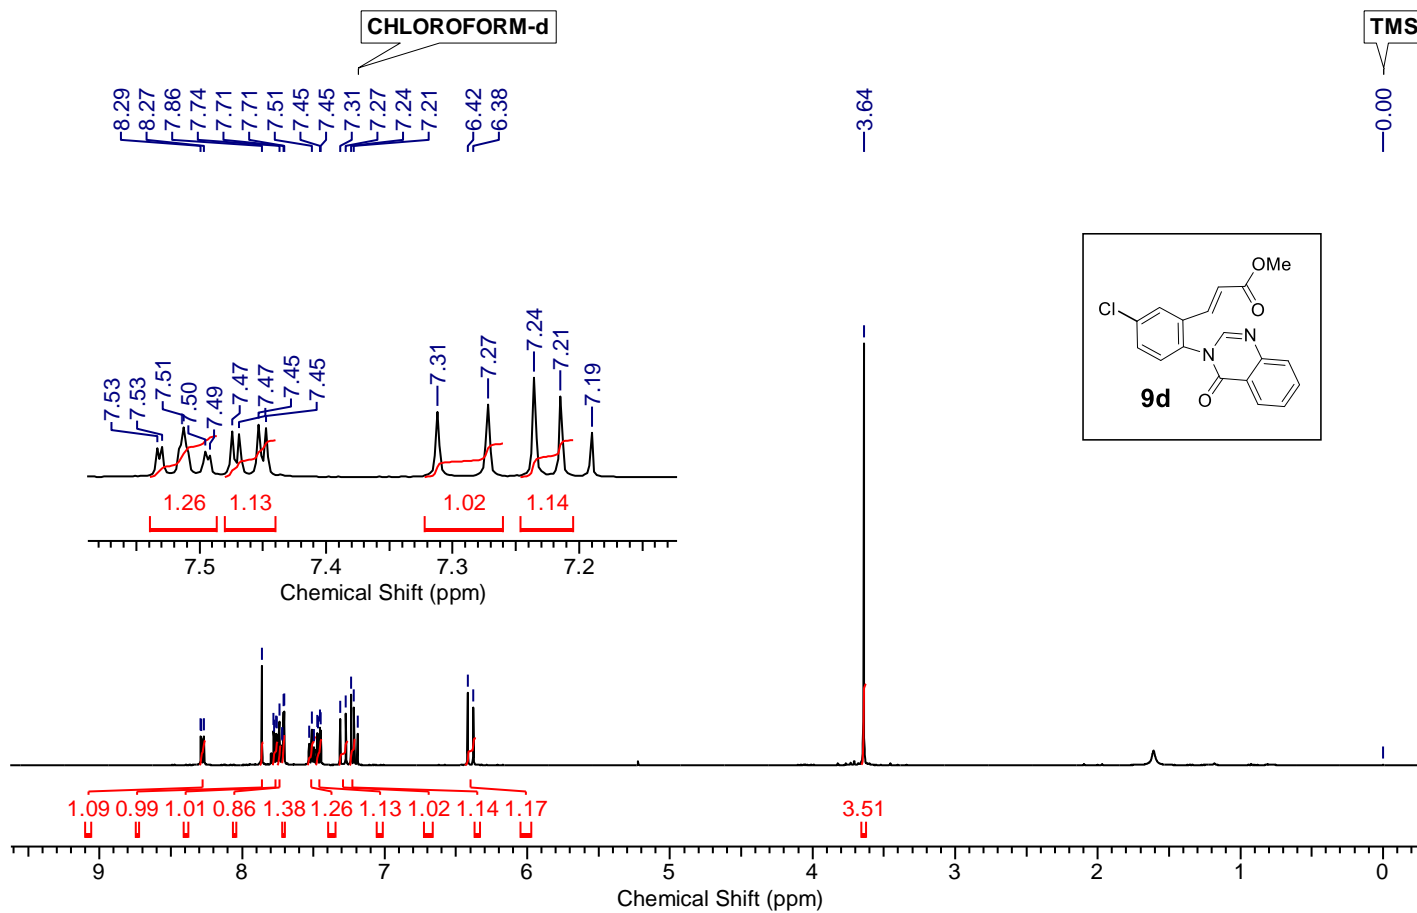

**<sup>13</sup>C NMR (100 MHz, CDCl<sub>3</sub>)**

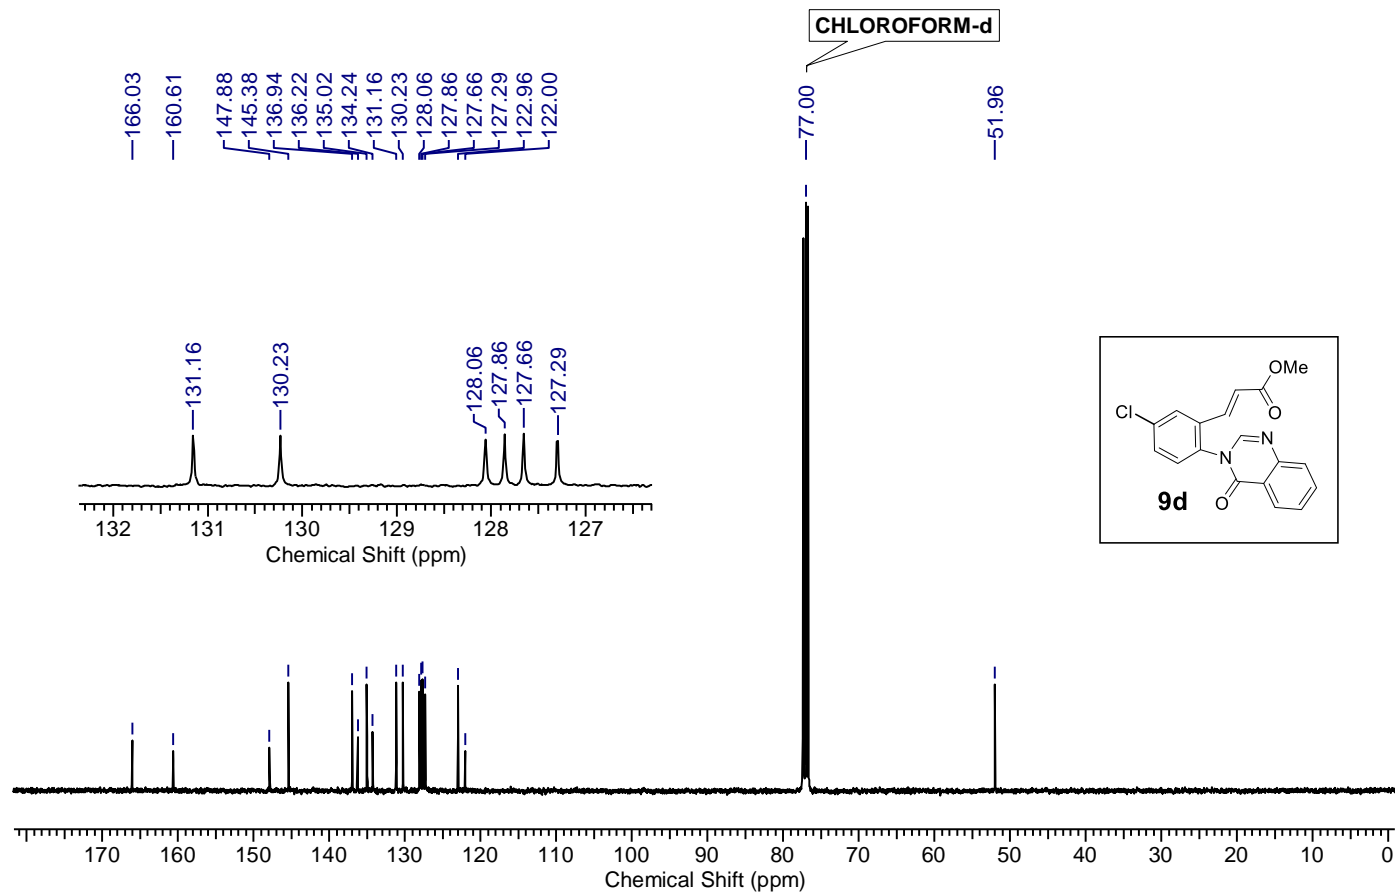

**$^1\text{H}$  NMR (400 MHz,  $\text{CDCl}_3$ )**

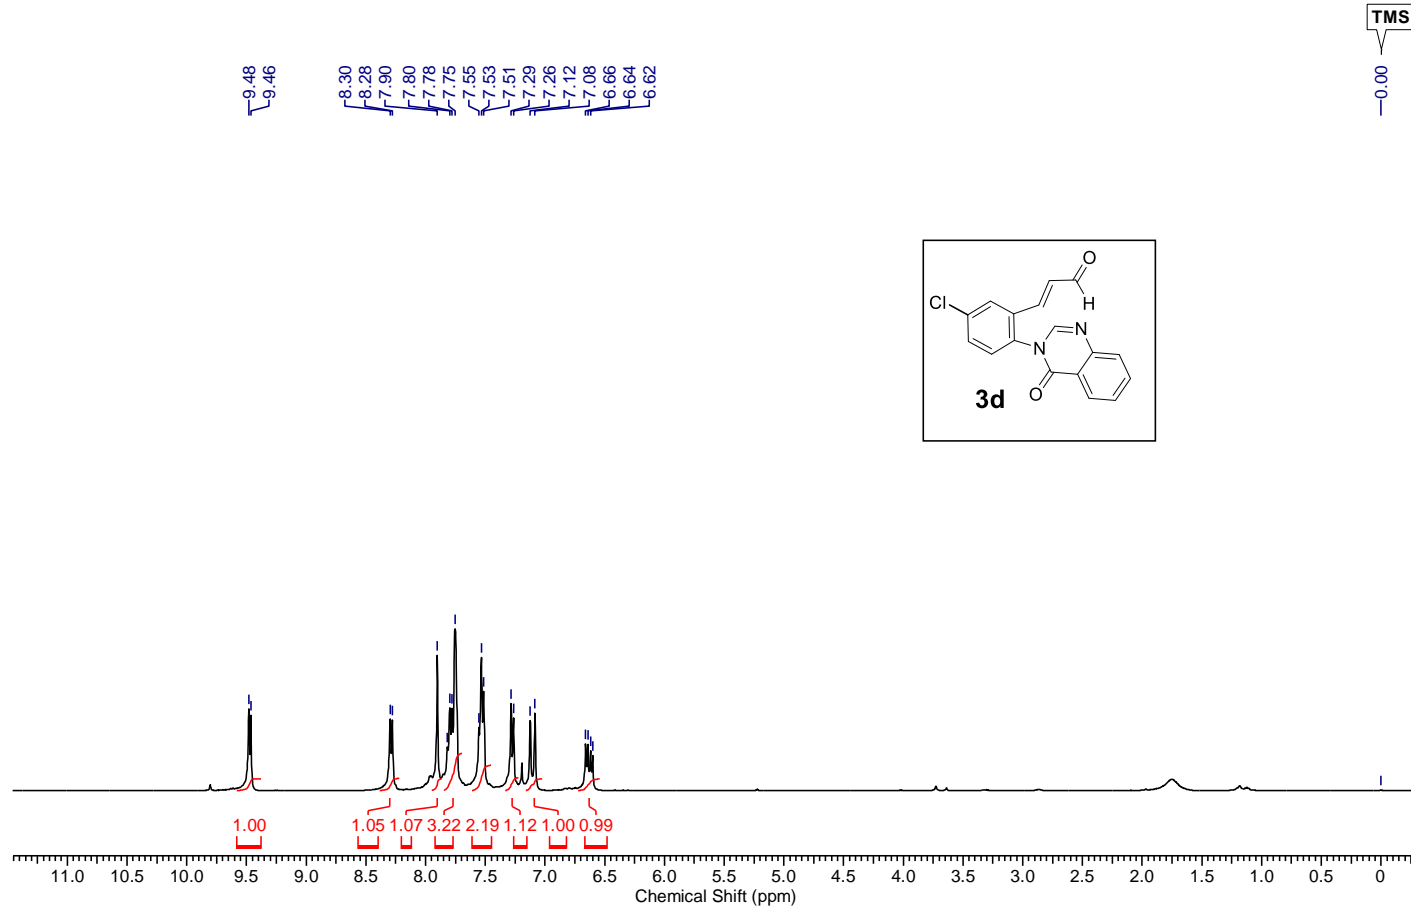

**$^{13}\text{C}$  NMR (100 MHz,  $\text{CDCl}_3$ )**

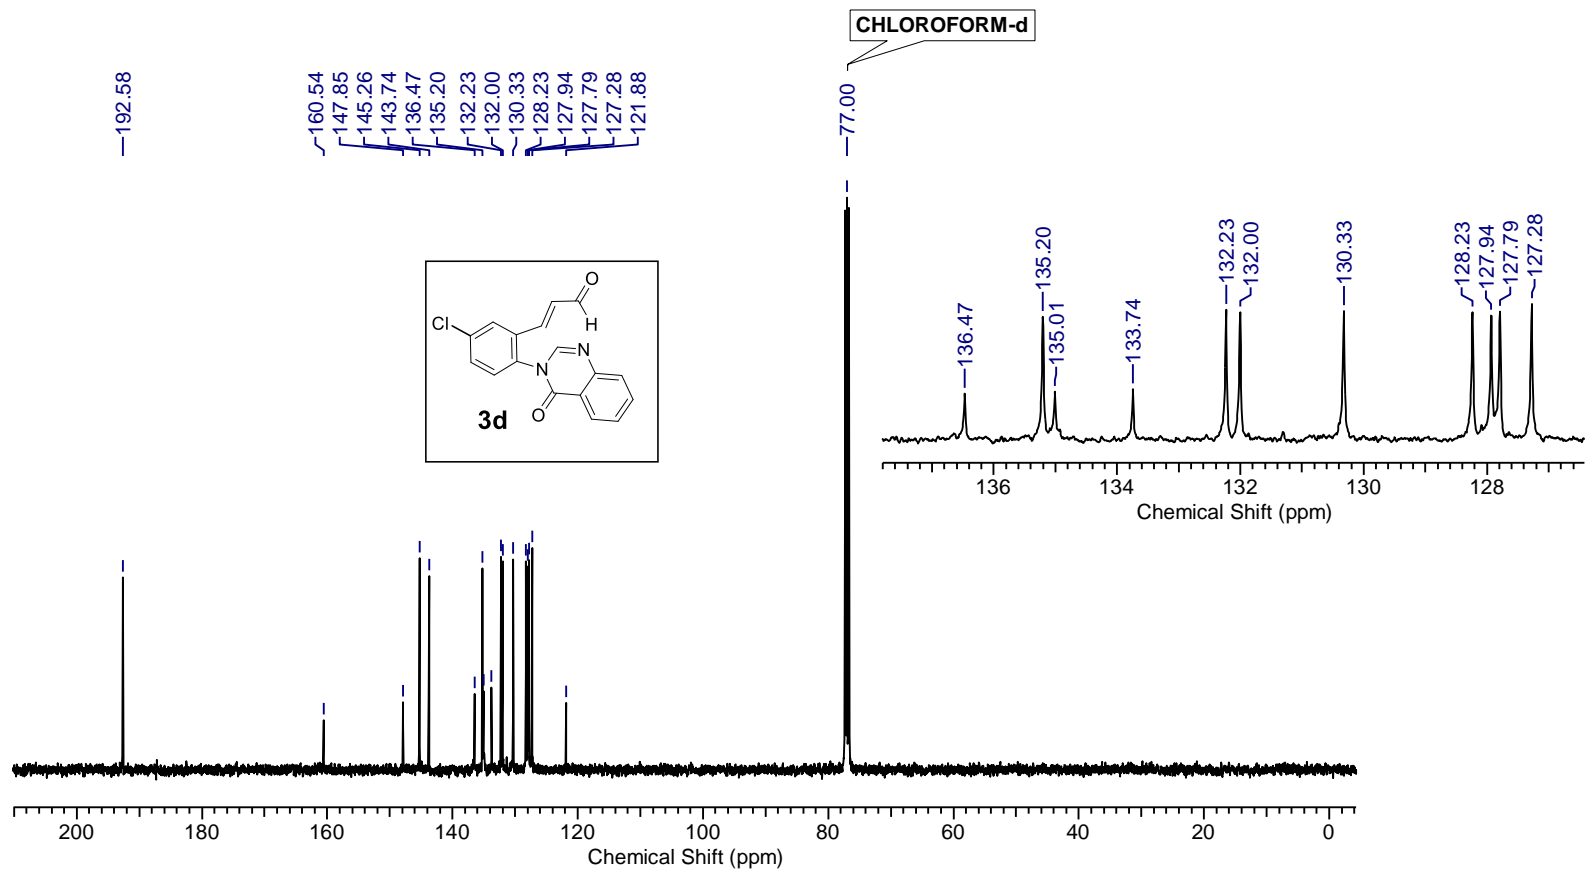

**$^1\text{H}$  NMR (500 MHz,  $\text{CDCl}_3$ )**

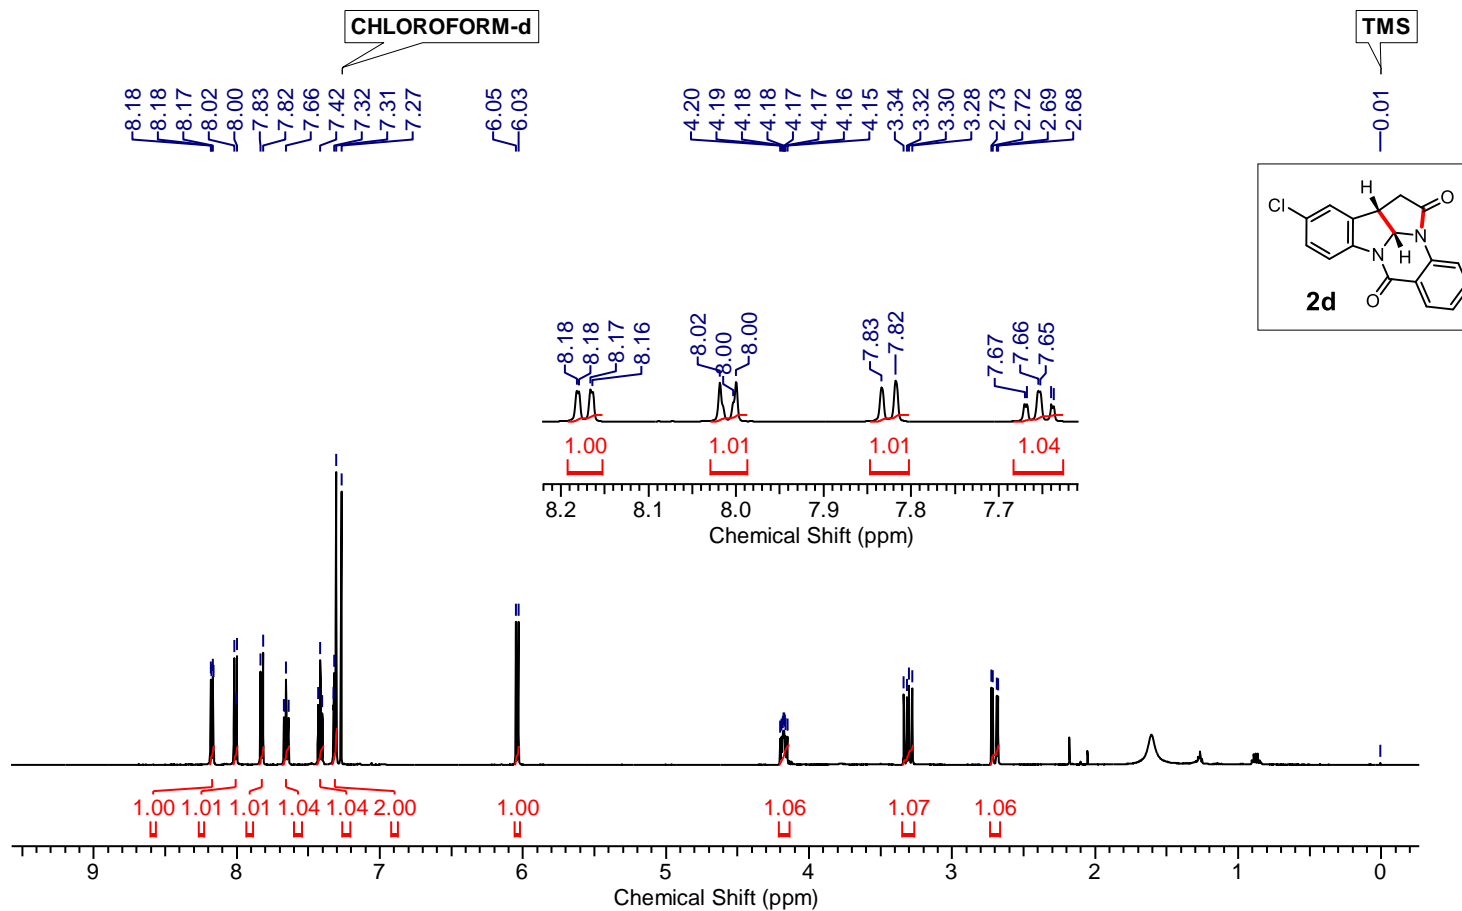



**<sup>13</sup>C NMR (125 MHz, CDCl<sub>3</sub>)**

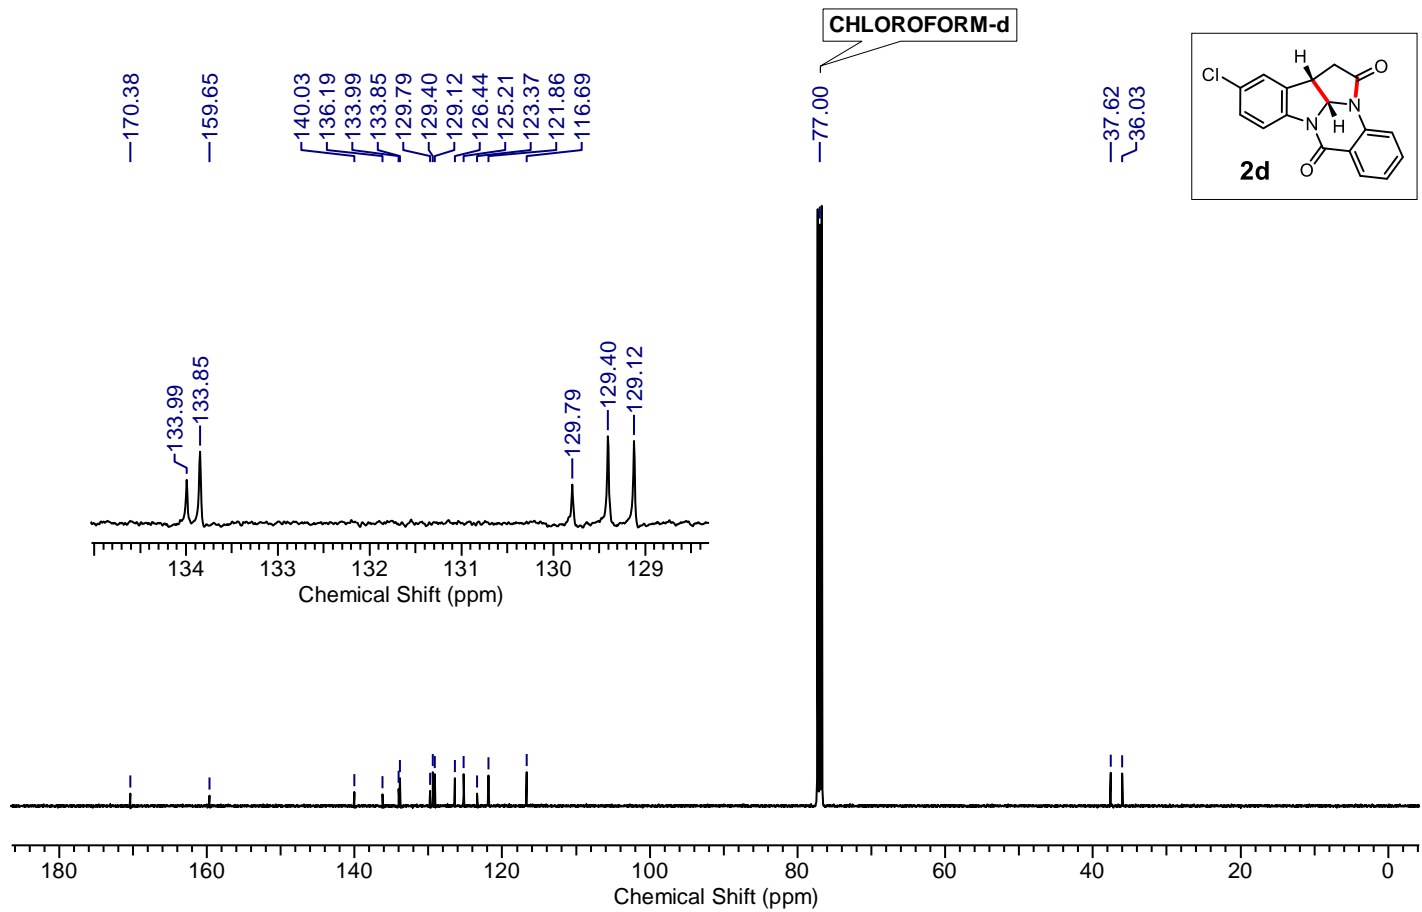

DEPT NMR

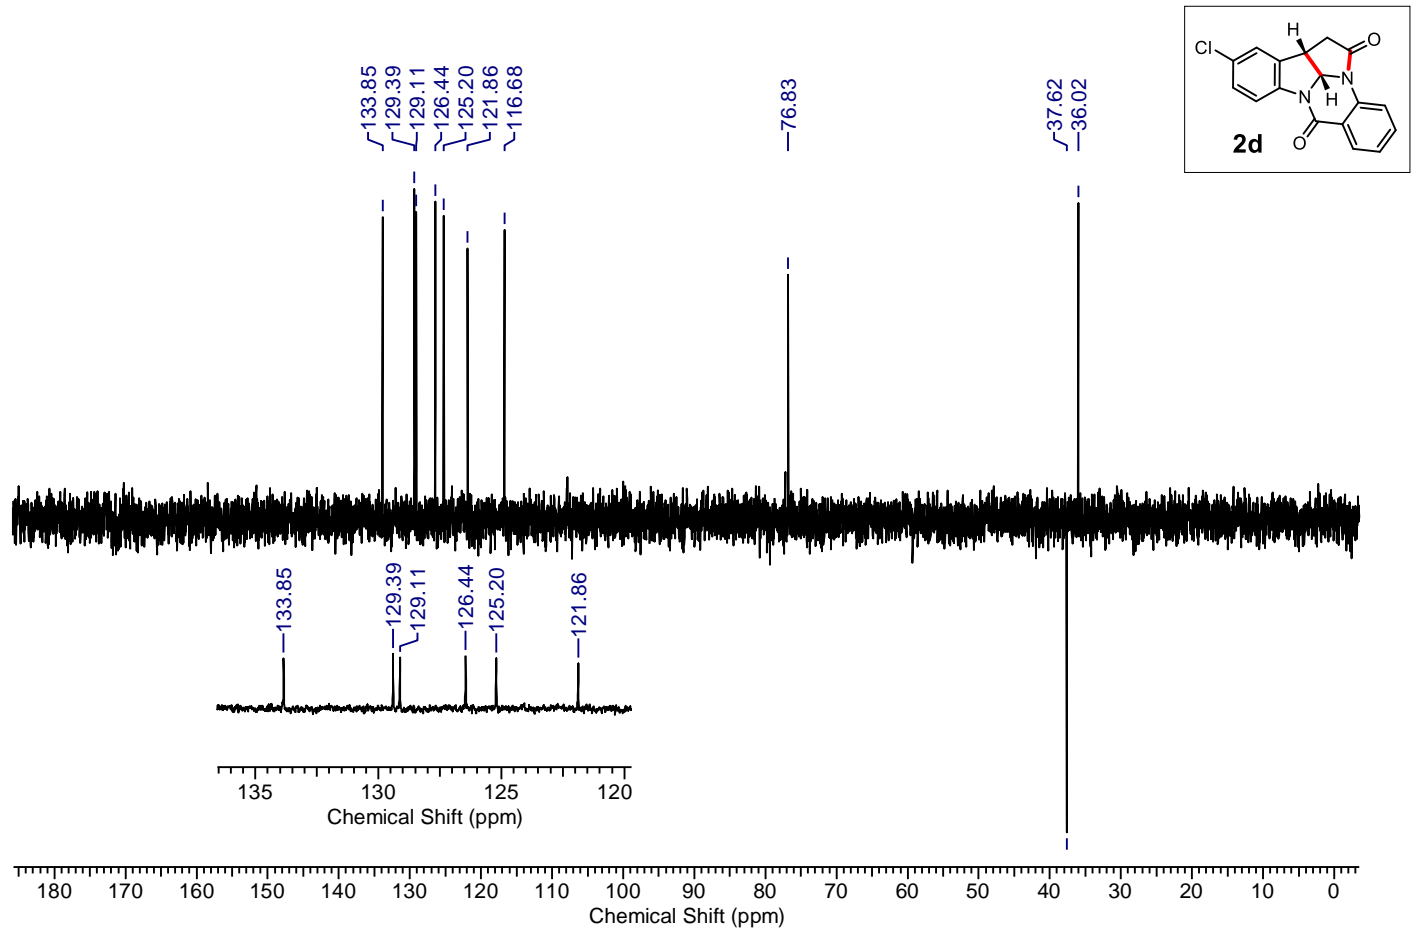

**<sup>1</sup>H NMR (400 MHz, CDCl<sub>3</sub>)**

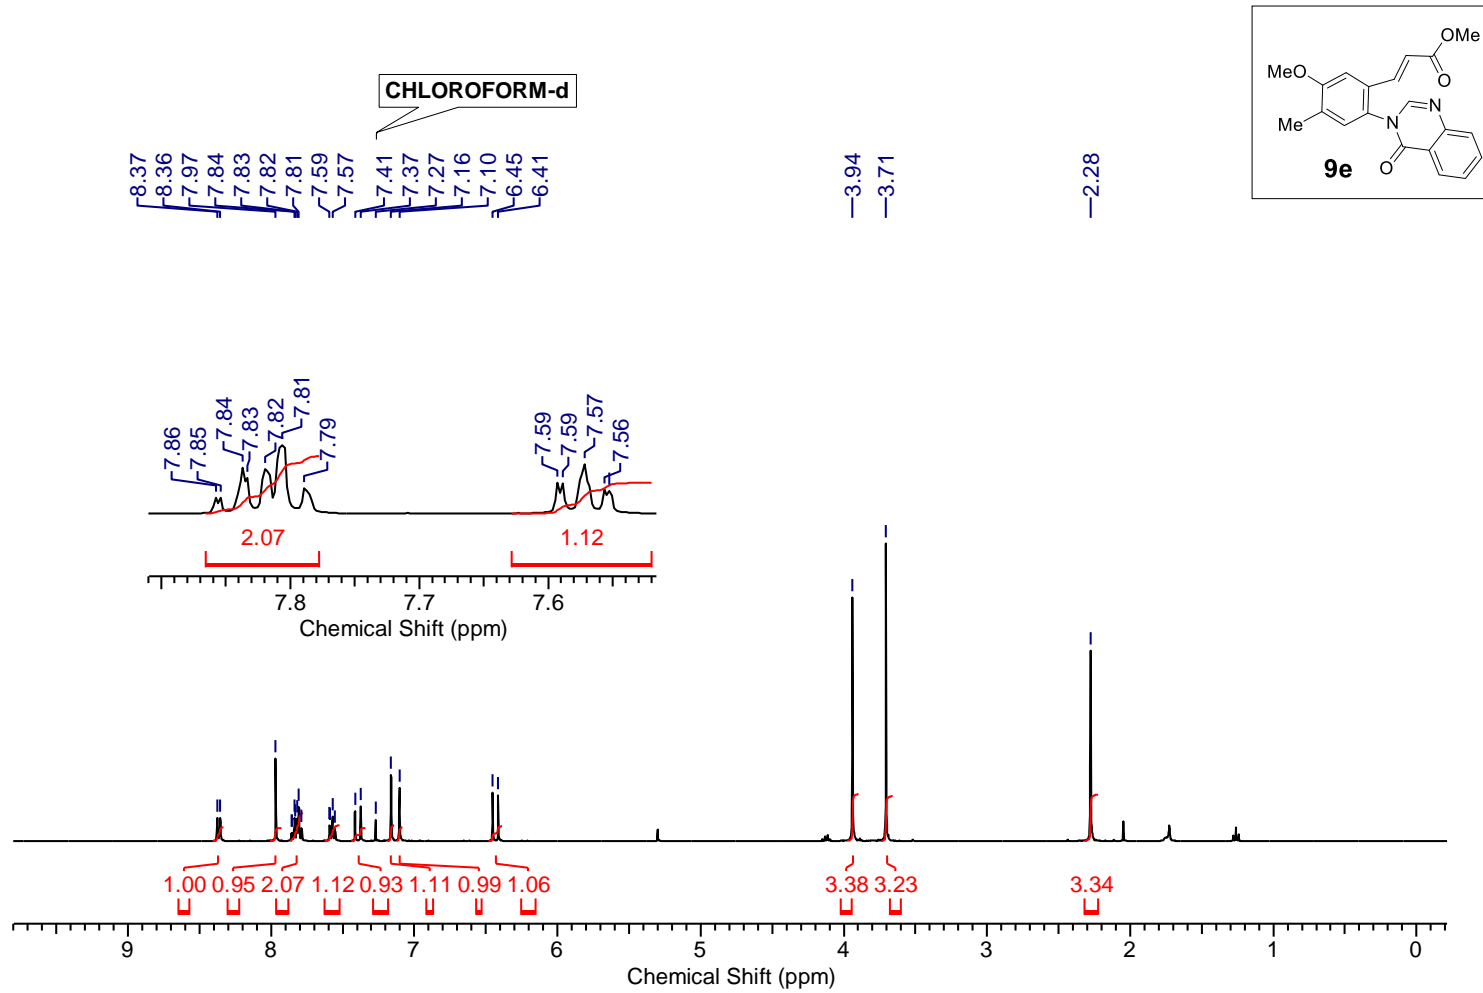

**$^{13}\text{C}$  NMR (100 MHz,  $\text{CDCl}_3$ )**

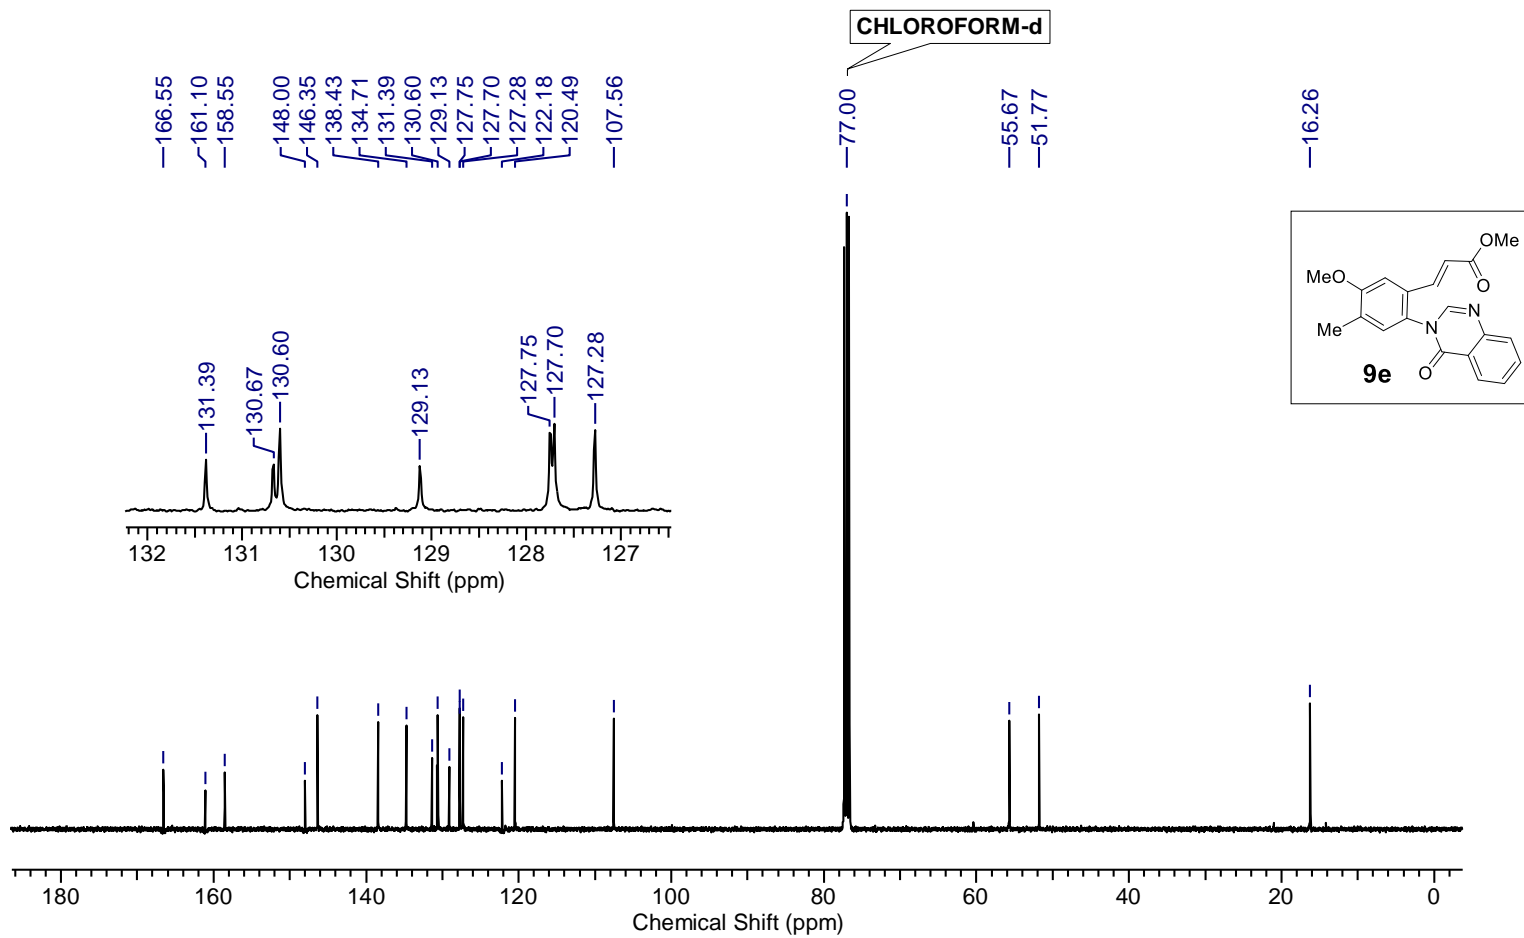

**<sup>1</sup>H NMR (400 MHz, CDCl<sub>3</sub>)**

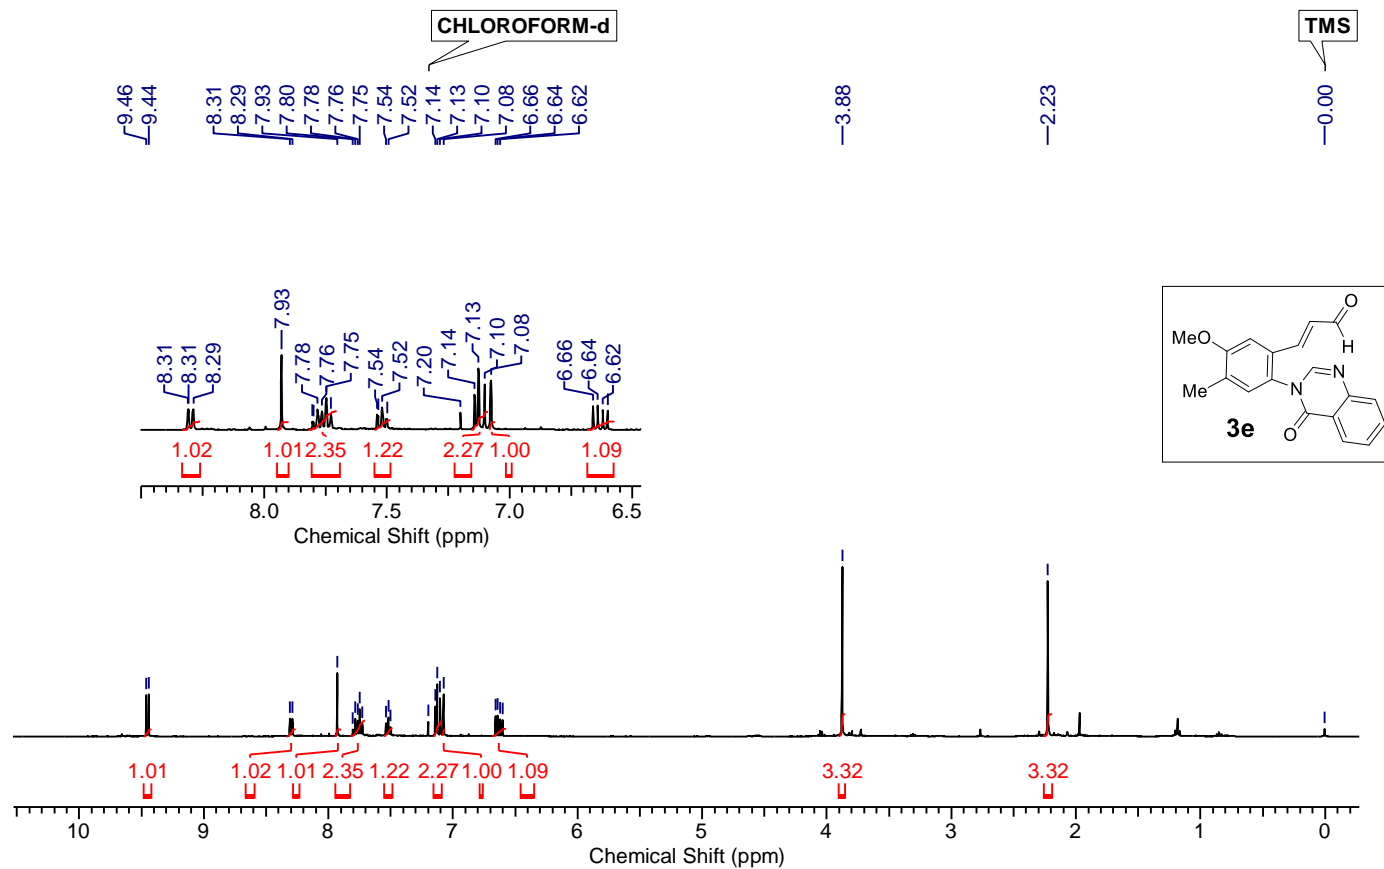

**<sup>13</sup>C NMR (100 MHz, CDCl<sub>3</sub>)**

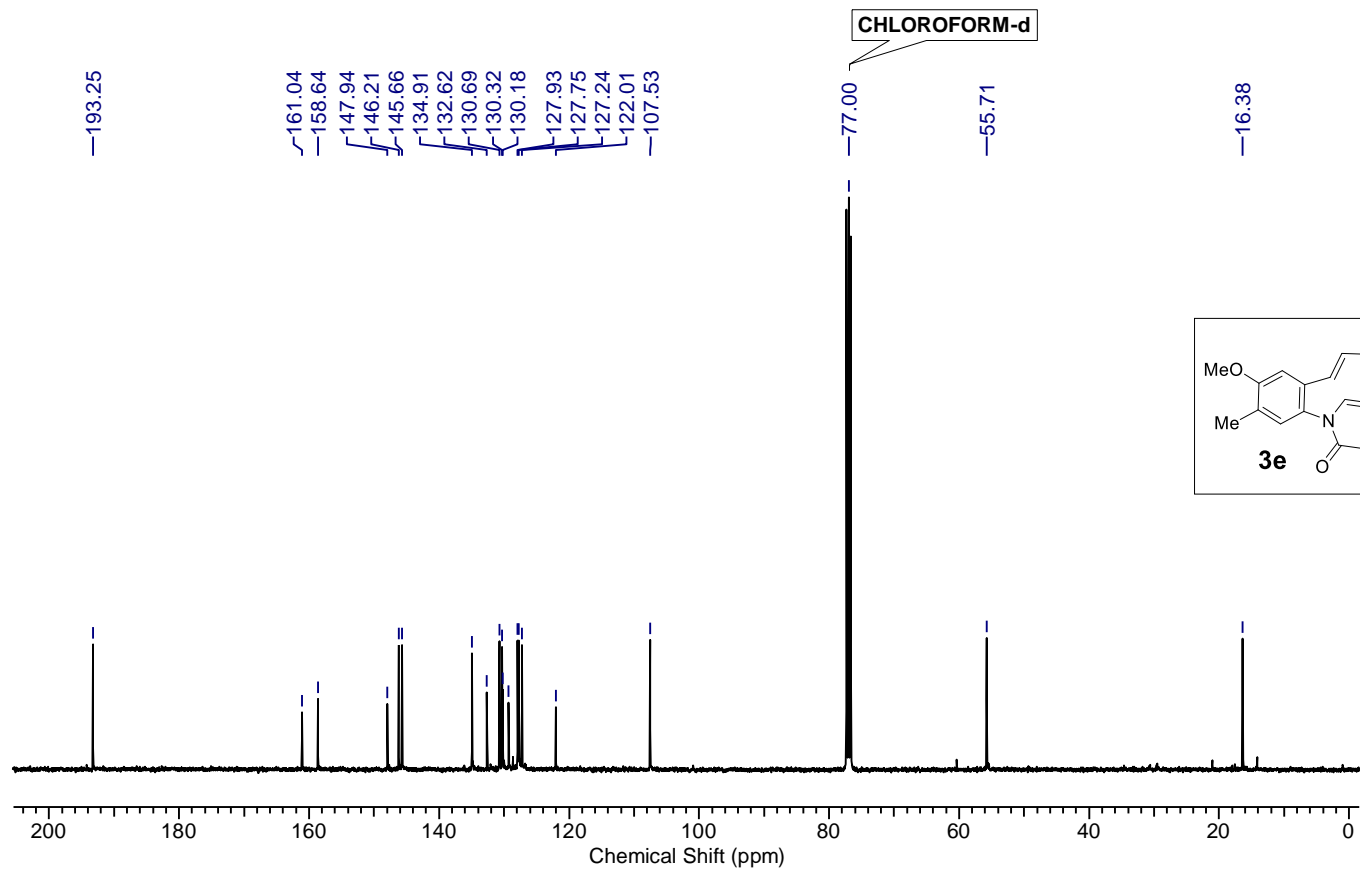

**<sup>1</sup>H NMR (400 MHz, CDCl<sub>3</sub>)**

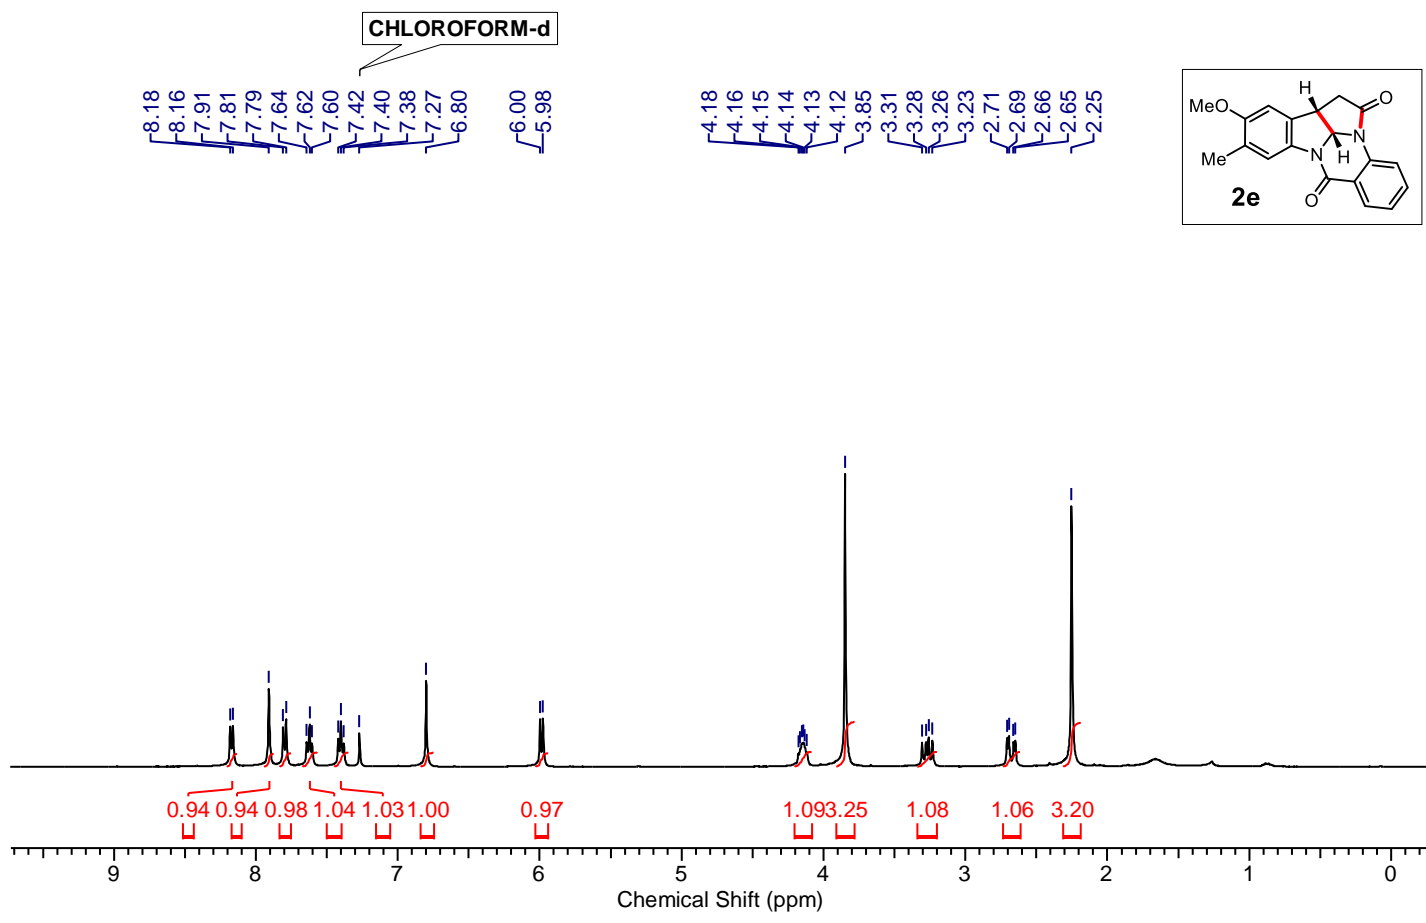

**<sup>13</sup>C NMR (100 MHz, CDCl<sub>3</sub>)**

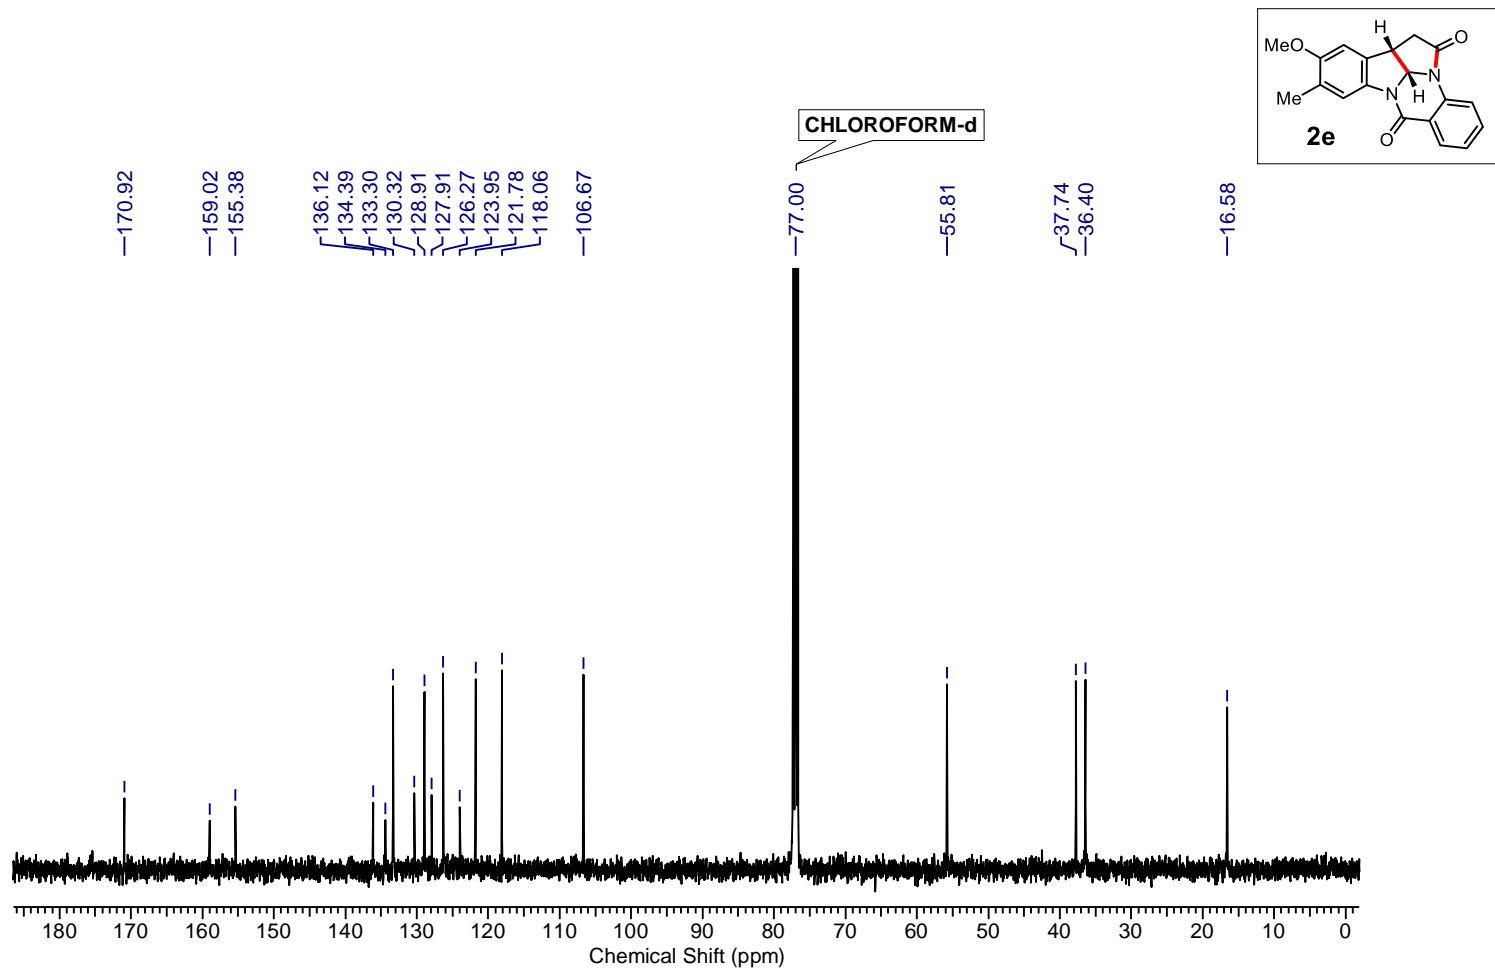



DEPT NMR

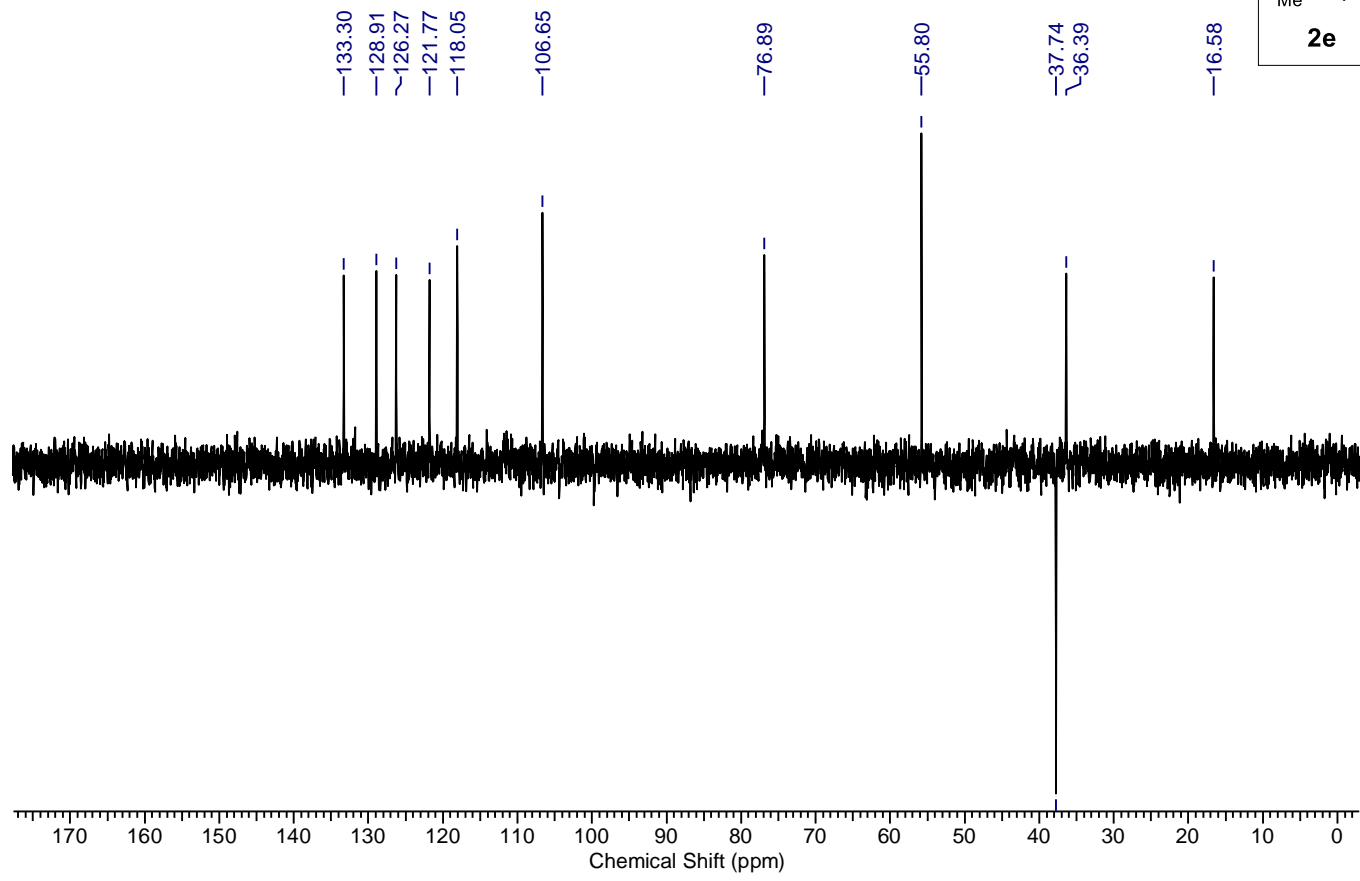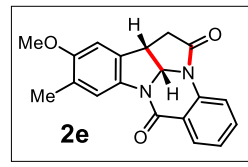

**$^1\text{H}$  NMR (500 MHz,  $\text{CDCl}_3$ )**

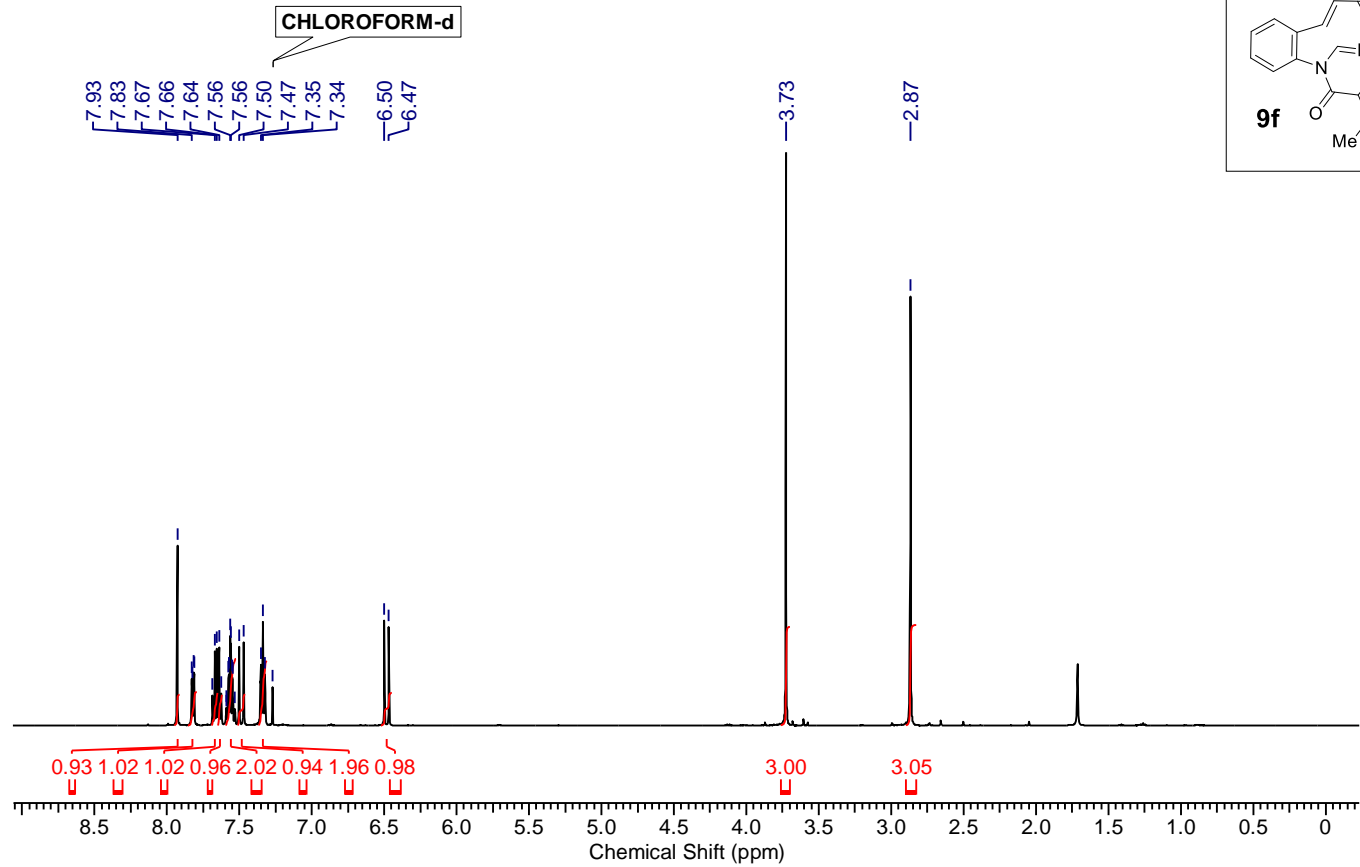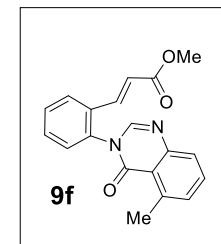

**$^{13}\text{C}$  NMR (125 MHz,  $\text{CDCl}_3$ )**

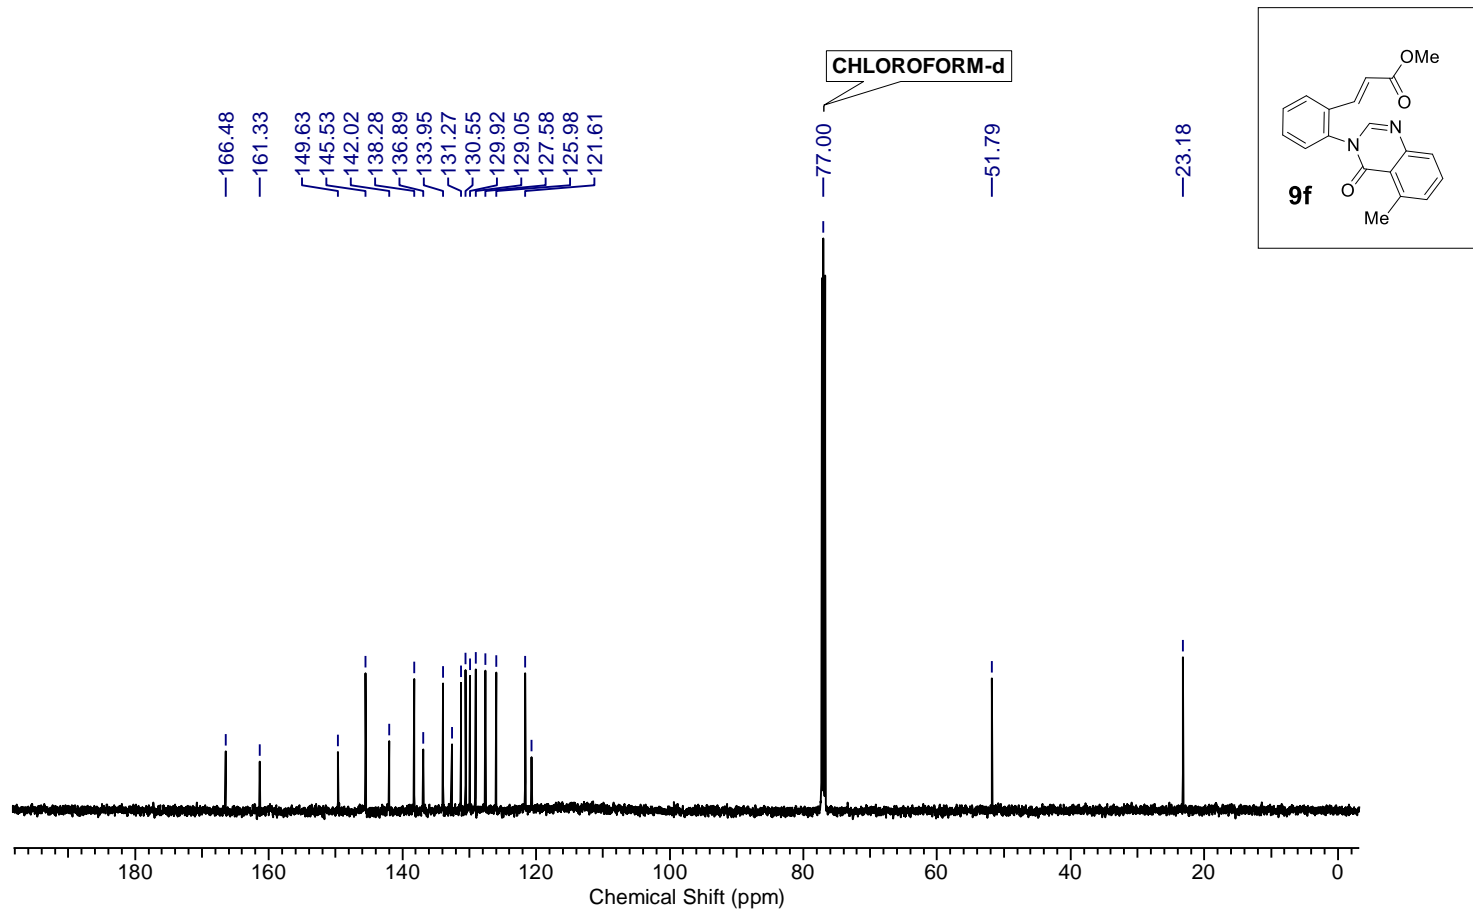

**$^1\text{H}$  NMR (400 MHz,  $\text{CDCl}_3$ )**

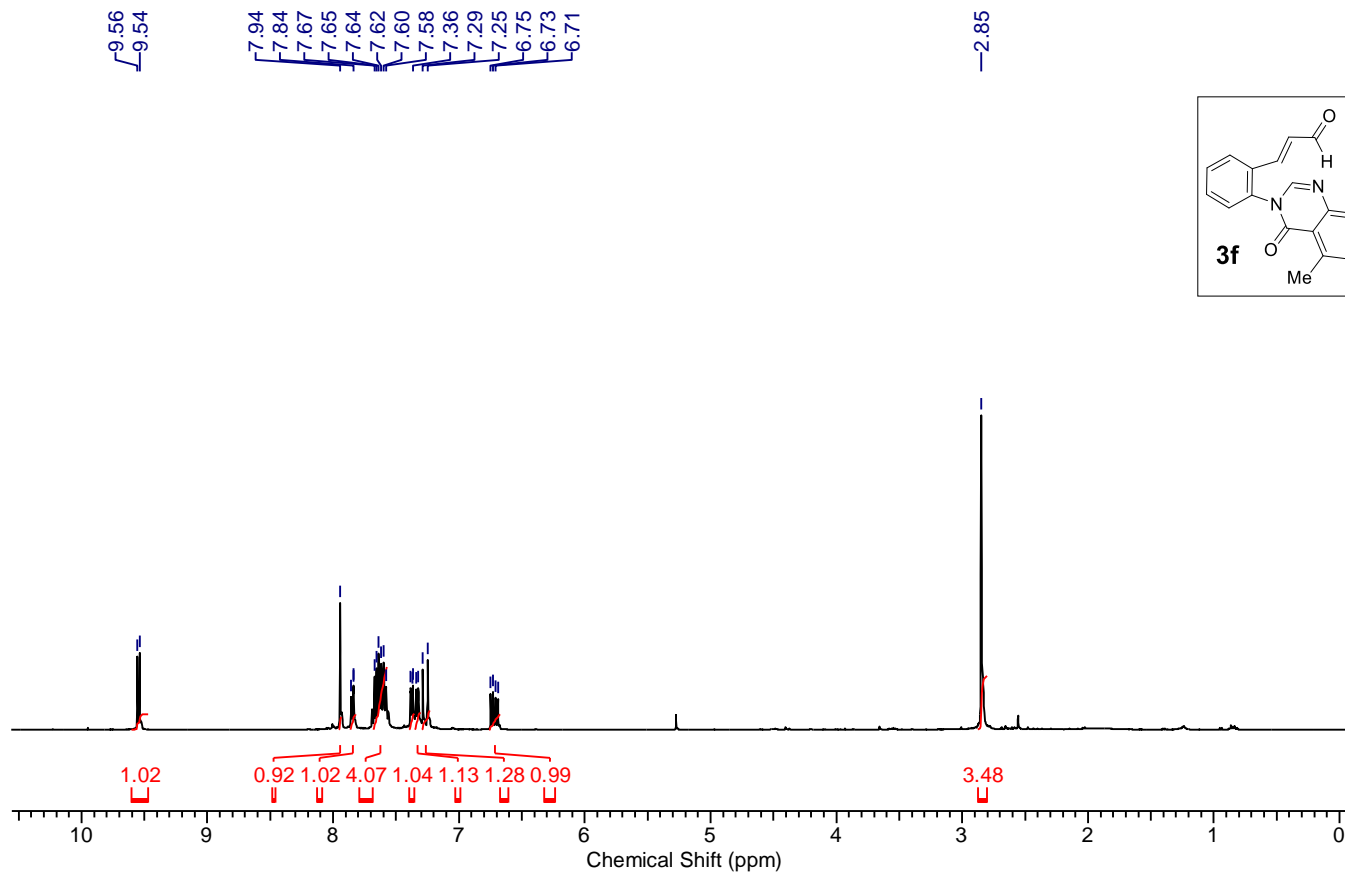

**$^{13}\text{C}$  NMR (100 MHz,  $\text{CDCl}_3$ )**

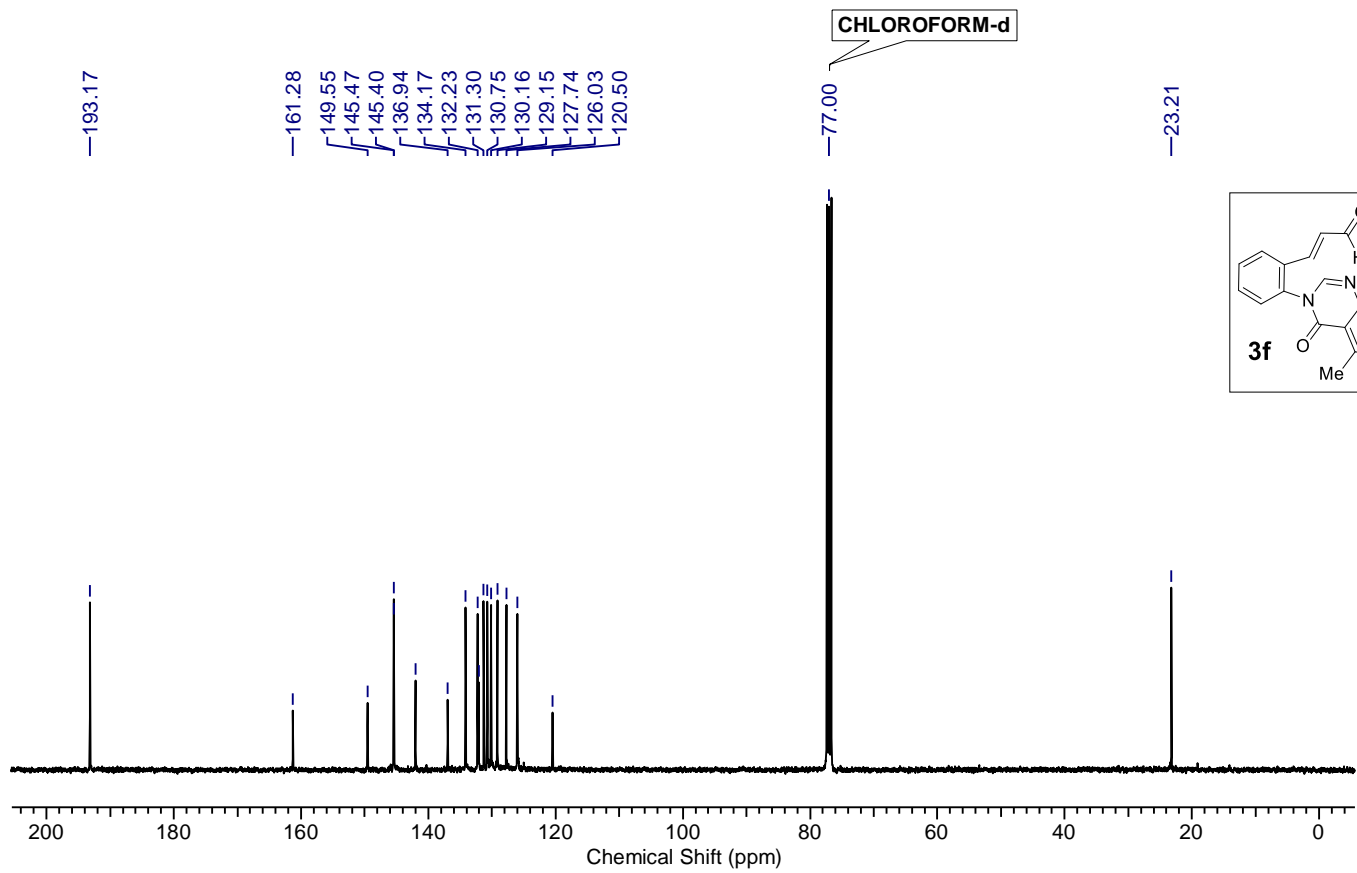

**$^1\text{H}$  NMR (400 MHz,  $\text{CDCl}_3$ )**

CHLOROFORM-d

8.18  
8.16  
7.95  
7.94  
7.82  
7.80  
7.64  
7.63  
7.61  
7.41  
7.40  
7.15  
7.13

6.01  
5.99

4.17  
4.14  
4.12  
3.31  
3.29  
3.28  
3.25  
2.71  
2.70  
2.67  
2.66  
2.36

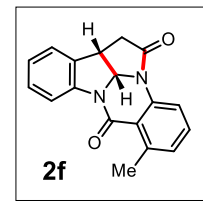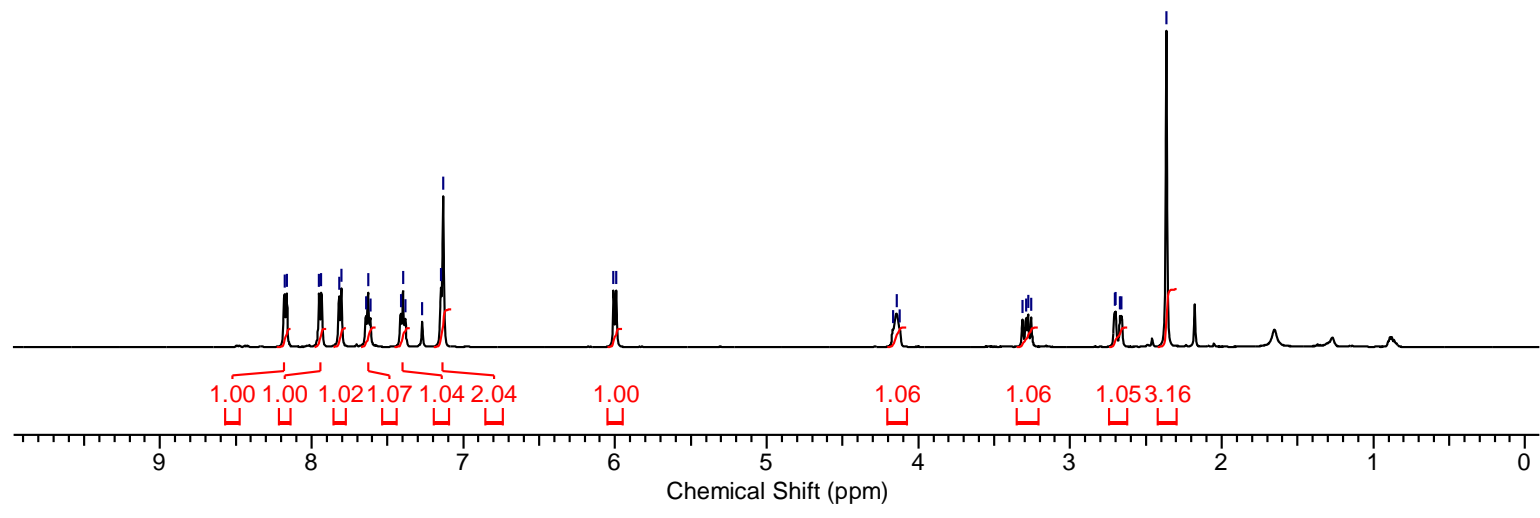

**$^{13}\text{C}$  NMR (100 MHz,  $\text{CDCl}_3$ )**

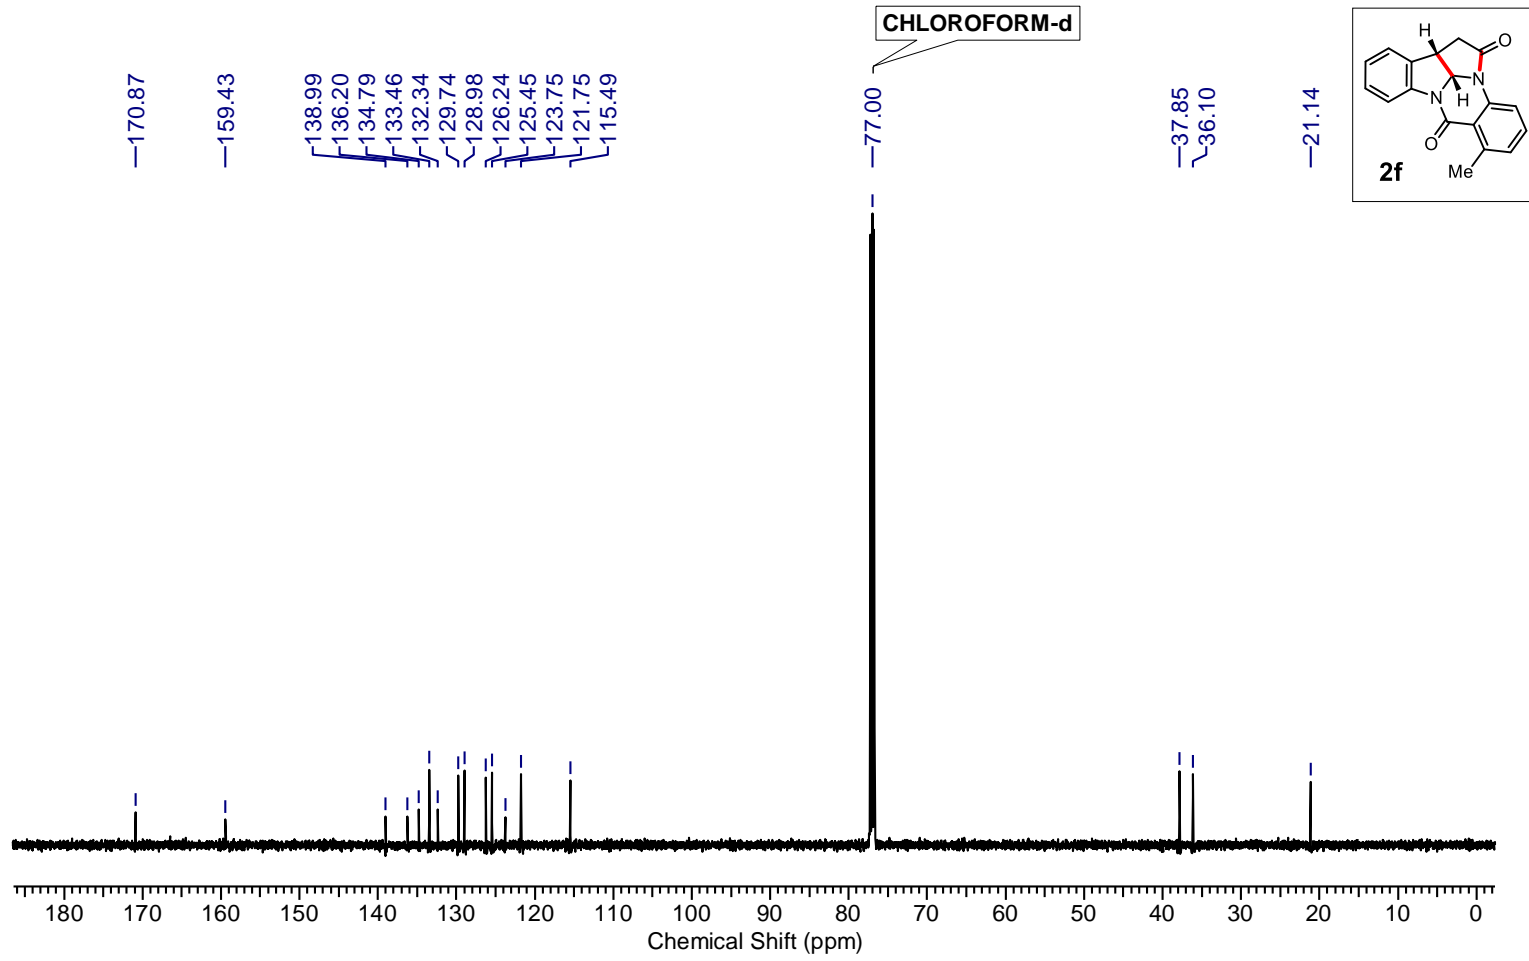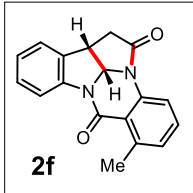

DEPT NMR

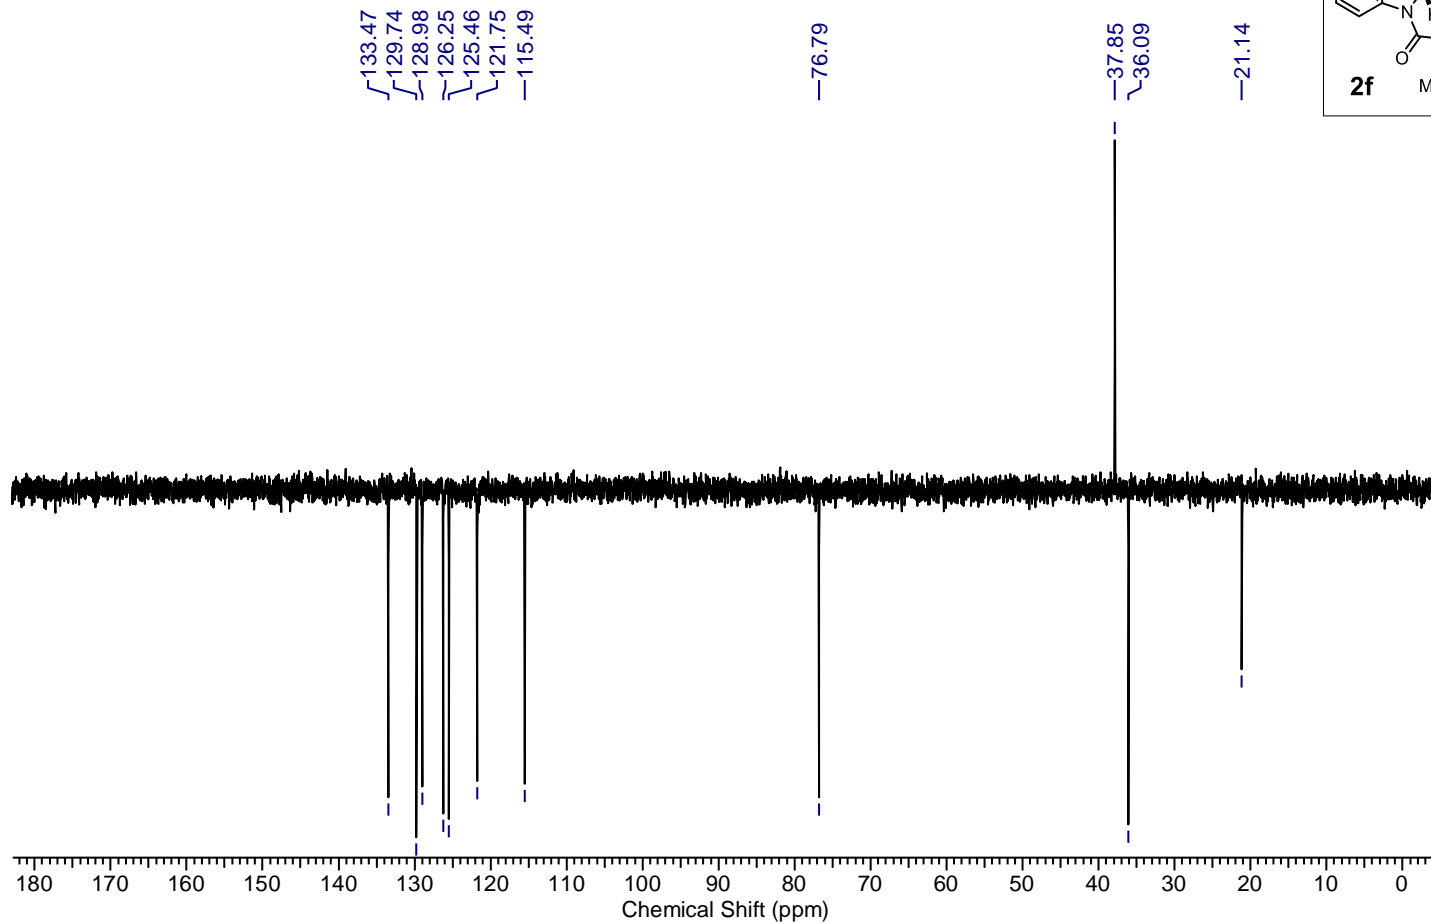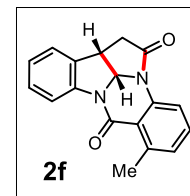



**$^1\text{H}$  NMR (500 MHz,  $\text{CDCl}_3$ )**

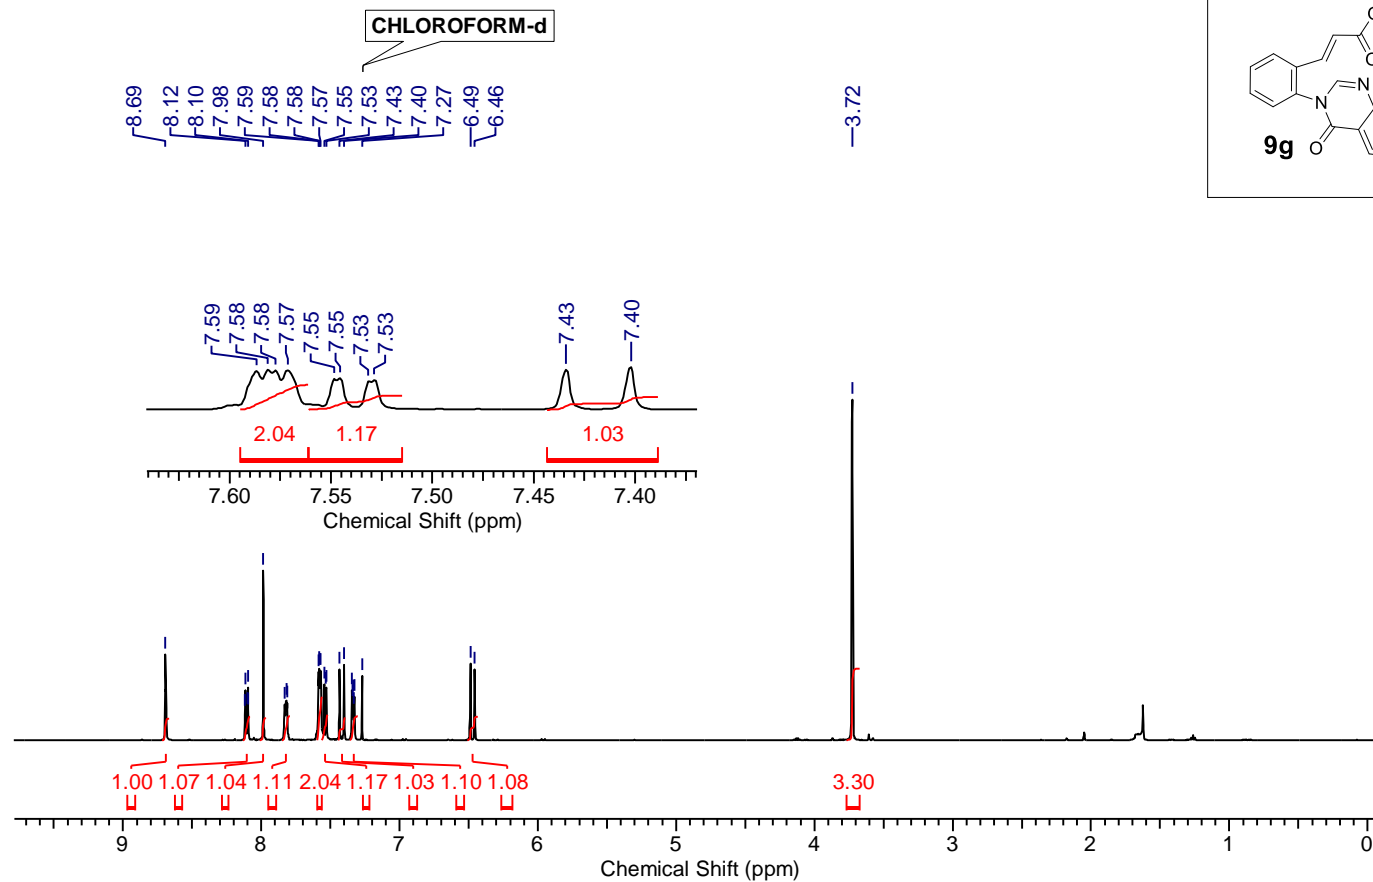

**<sup>13</sup>C NMR (125 MHz, CDCl<sub>3</sub>)**

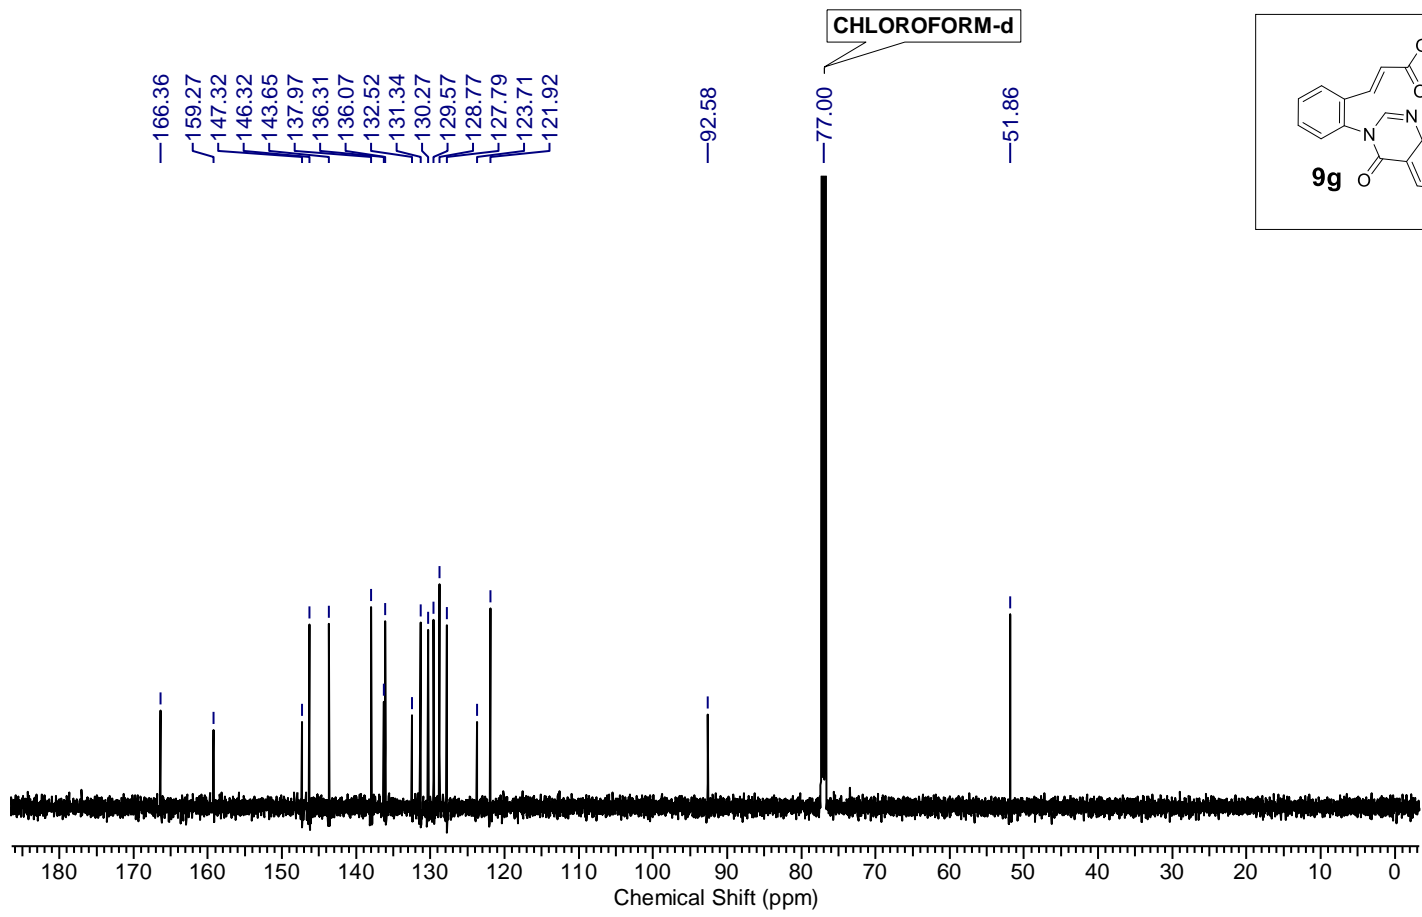

**$^1\text{H}$  NMR (400 MHz,  $\text{CDCl}_3$ )**

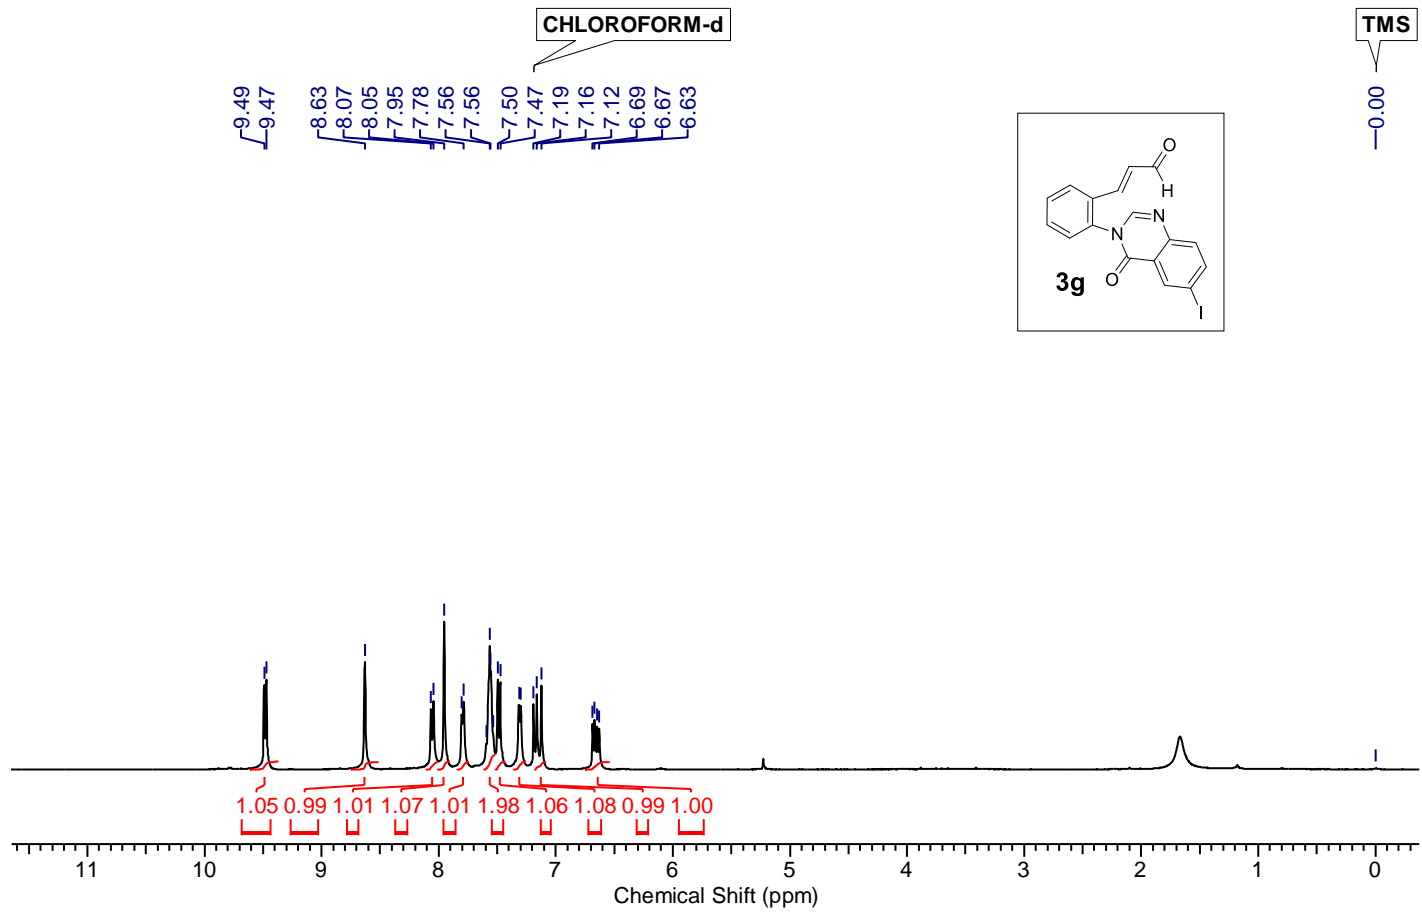

**$^{13}\text{C}$  NMR (100 MHz,  $\text{CDCl}_3$ )**

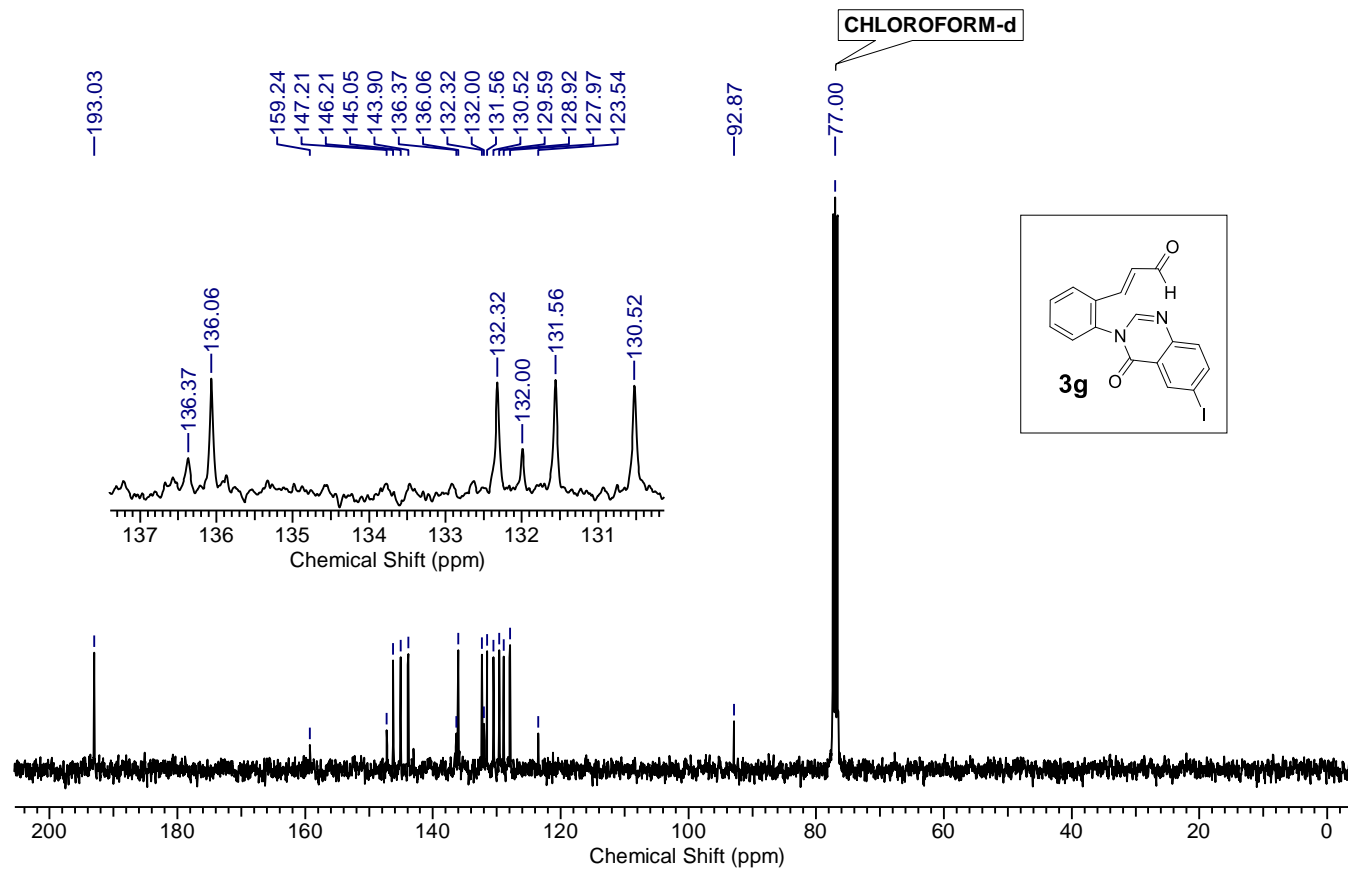

**$^1\text{H}$  NMR (400 MHz,  $\text{CDCl}_3$ )**

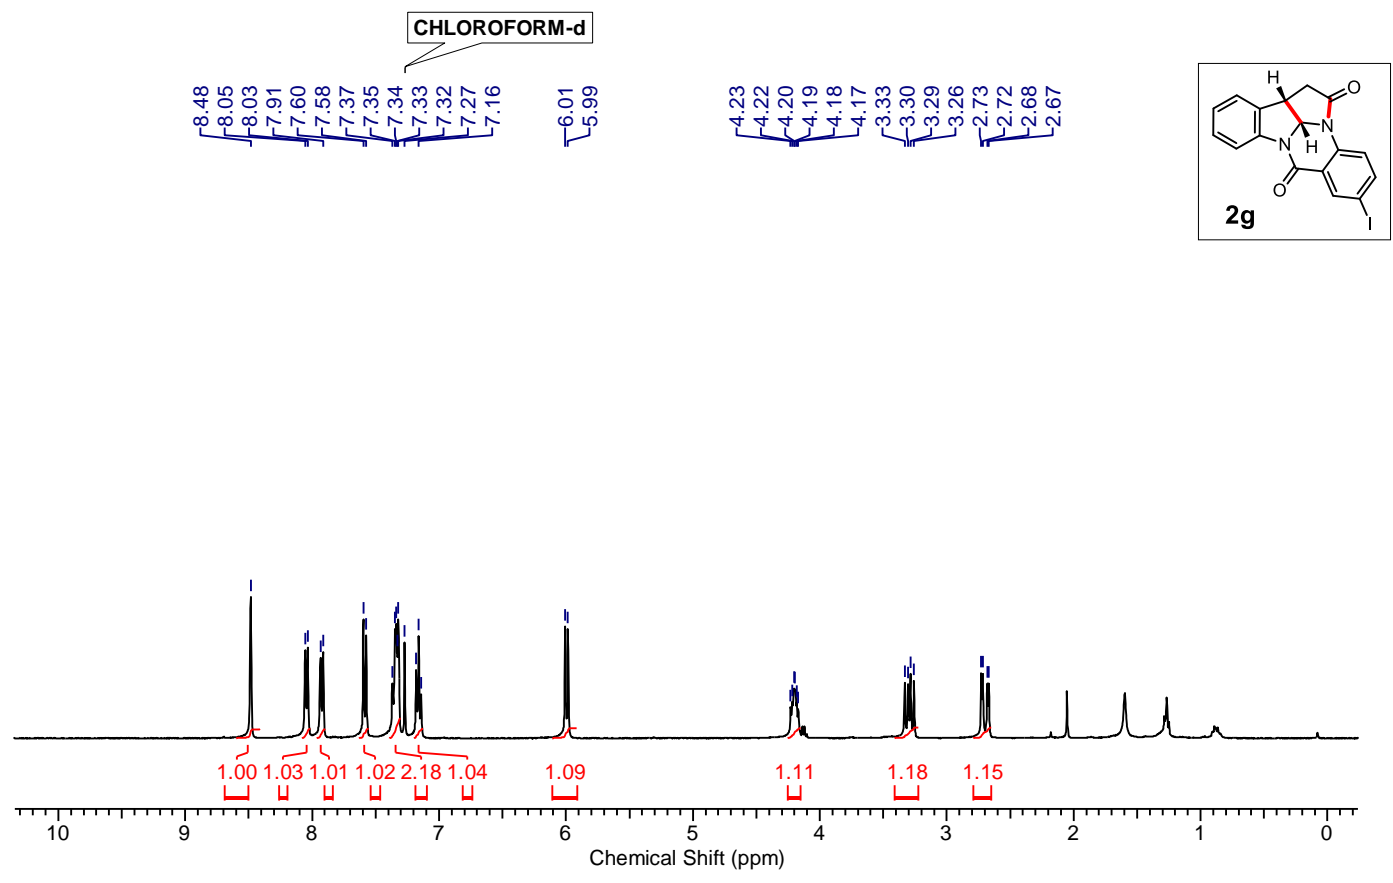

**$^{13}\text{C}$  NMR (100 MHz,  $\text{CDCl}_3$ )**

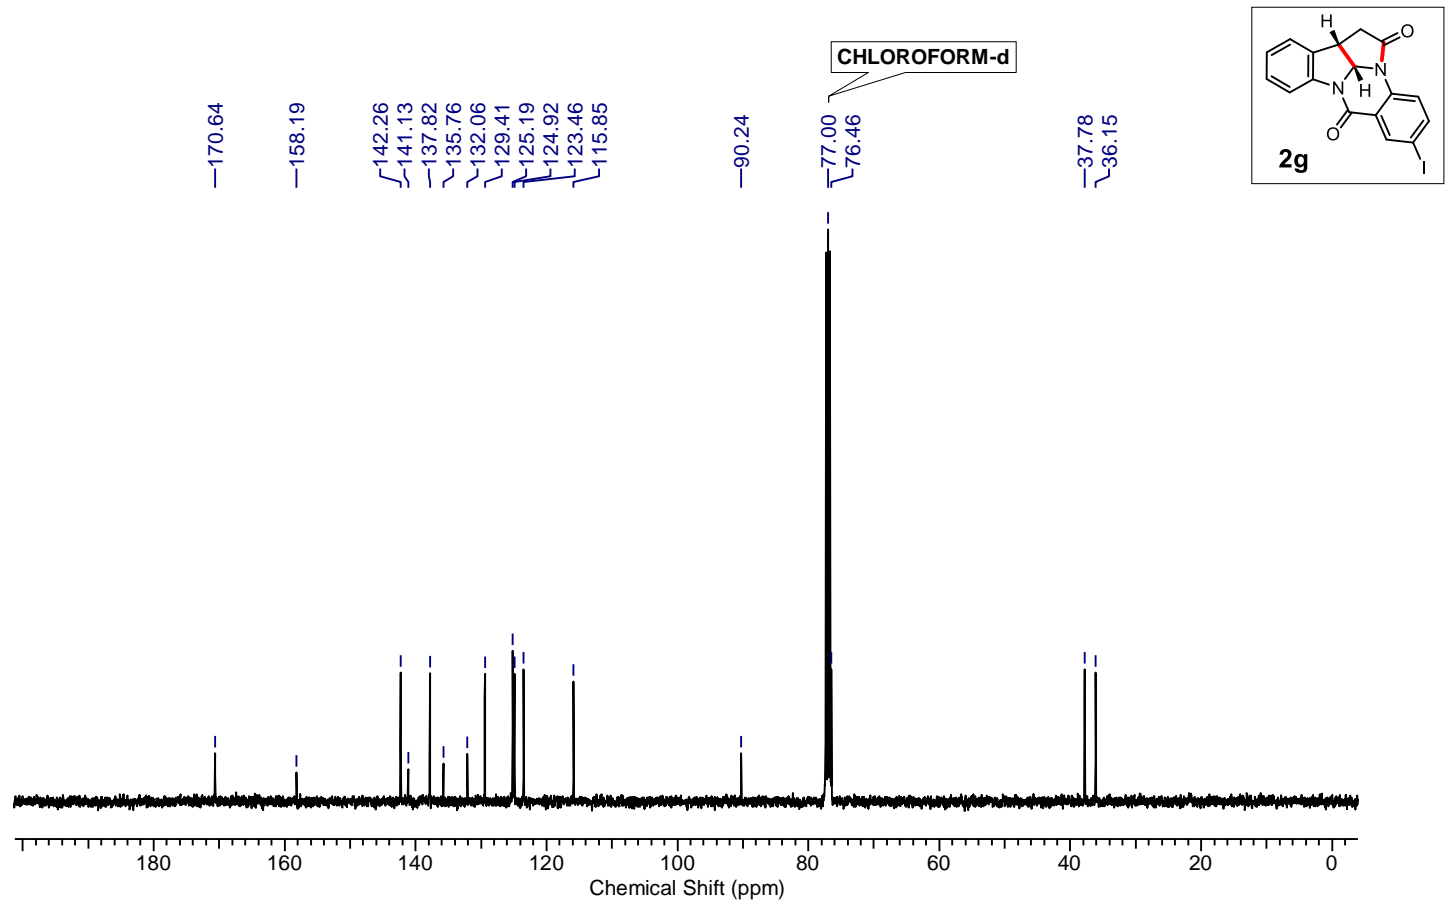

DEPT NMR

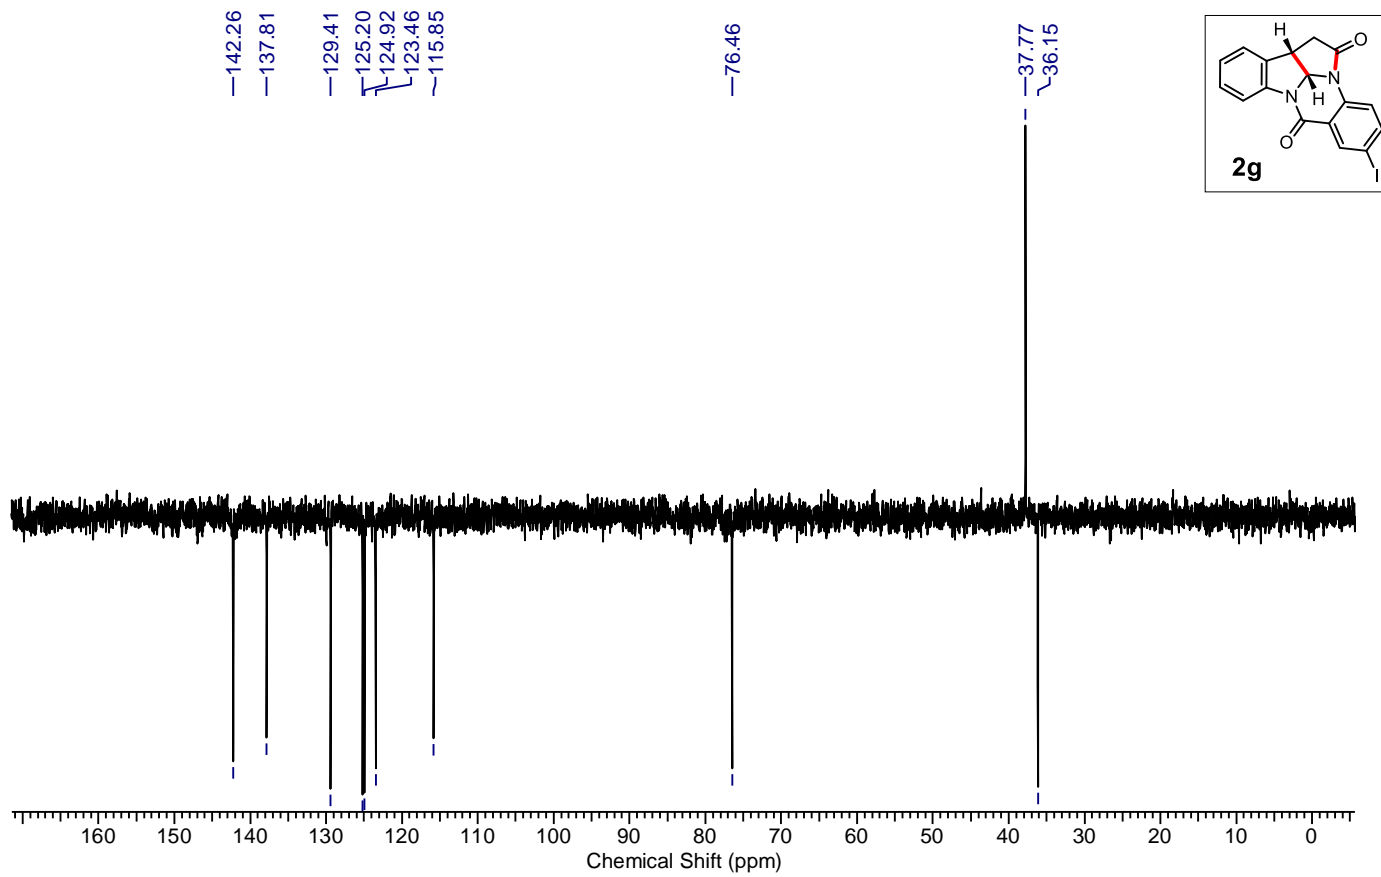

**$^1\text{H}$  NMR (400 MHz,  $\text{CDCl}_3$ )**

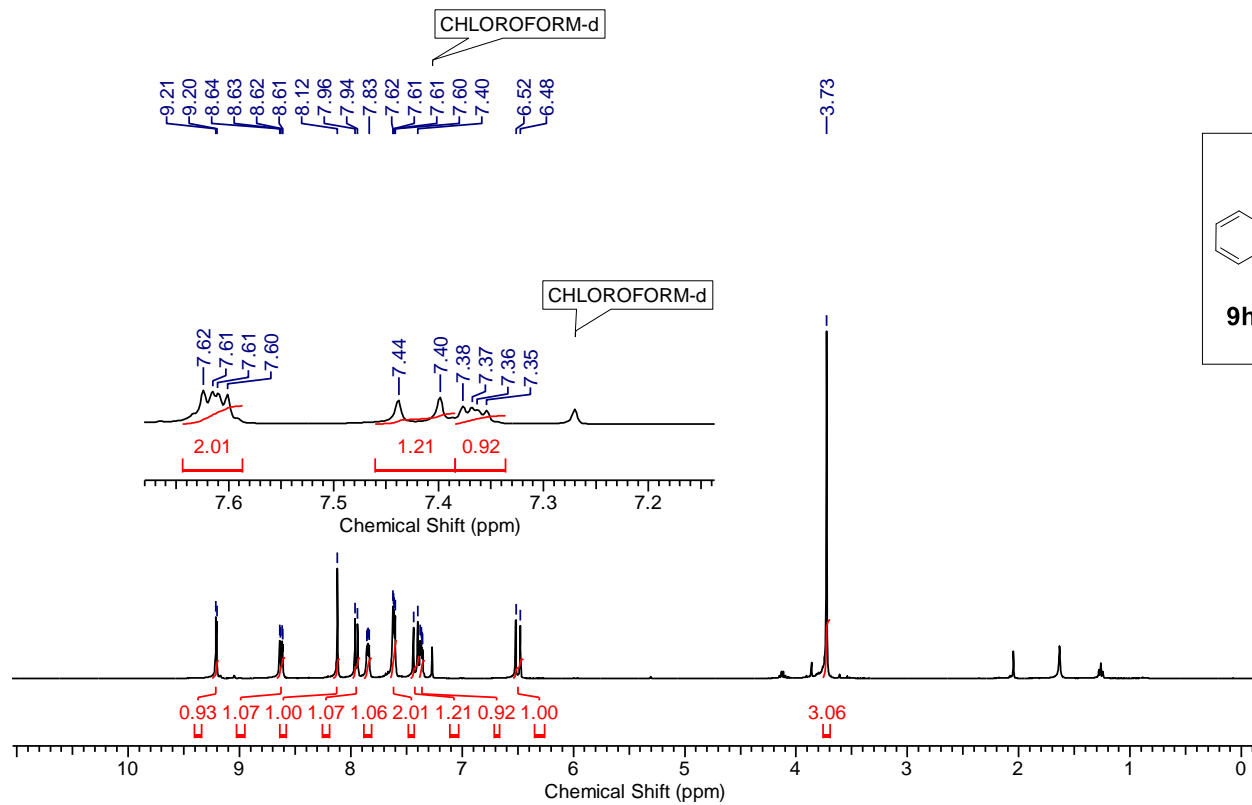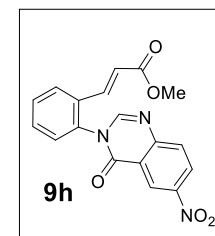



**<sup>13</sup>C NMR (100 MHz, CDCl<sub>3</sub>)**

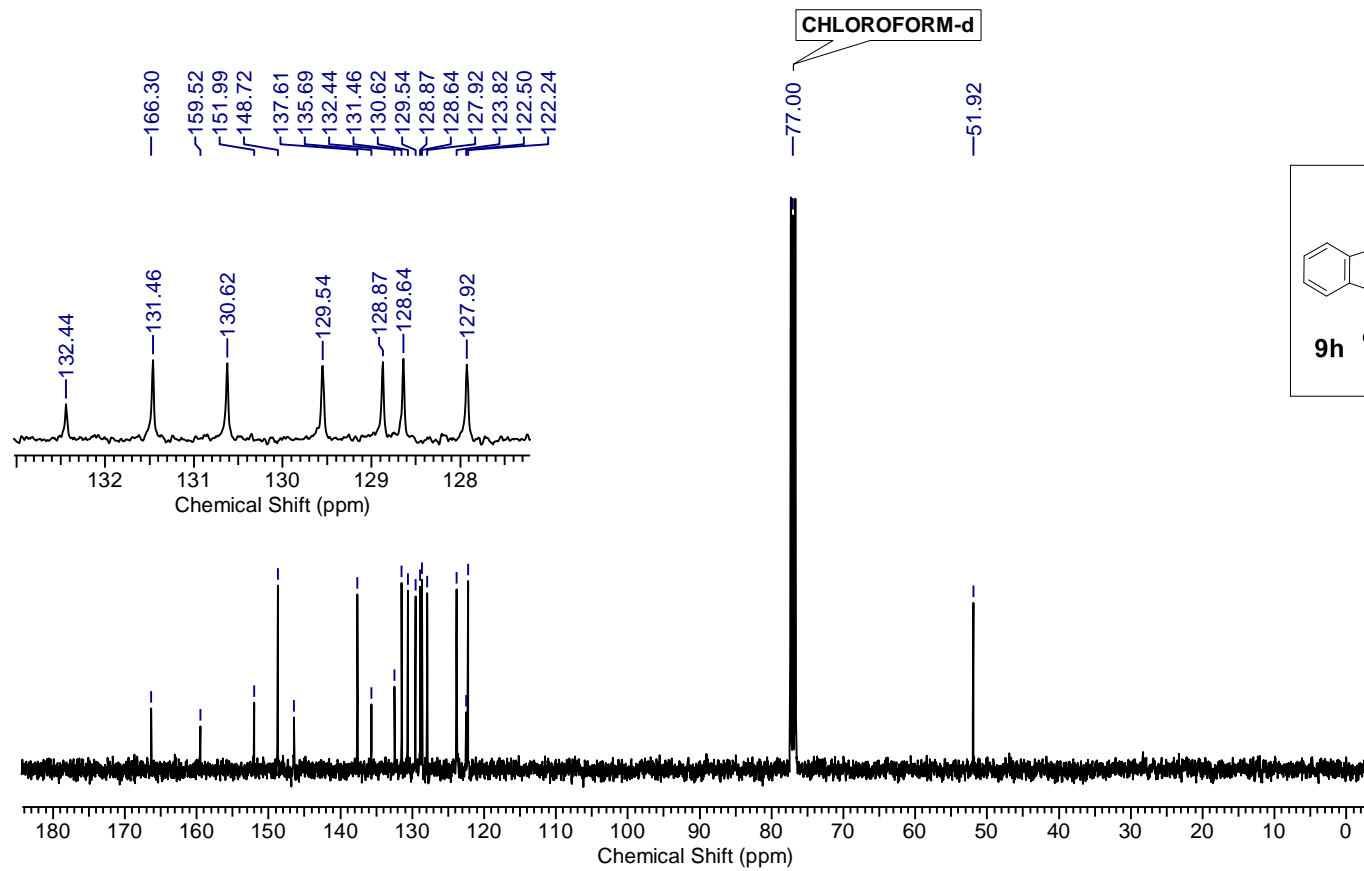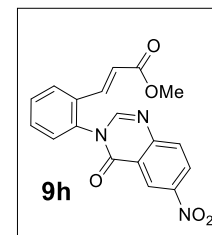

**<sup>1</sup>H NMR (500 MHz, CDCl<sub>3</sub>)**

CHLOROFORM-d

9.58  
9.57  
9.23  
9.23  
8.66  
8.65  
8.64  
8.17  
7.99  
7.97  
7.89  
7.69  
7.68  
7.68  
7.67  
7.42  
7.27  
7.25  
7.21  
6.77  
6.76

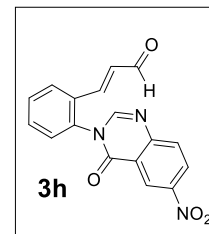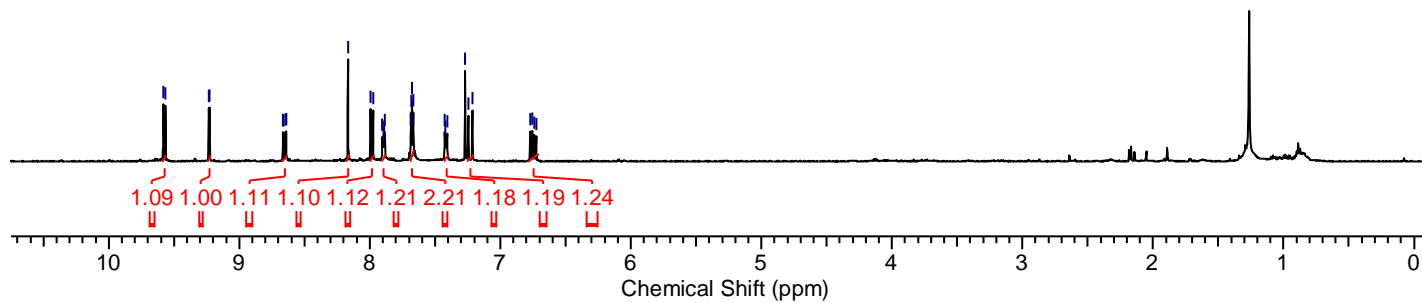

**$^{13}\text{C}$  NMR (125 MHz,  $\text{CDCl}_3$ )**

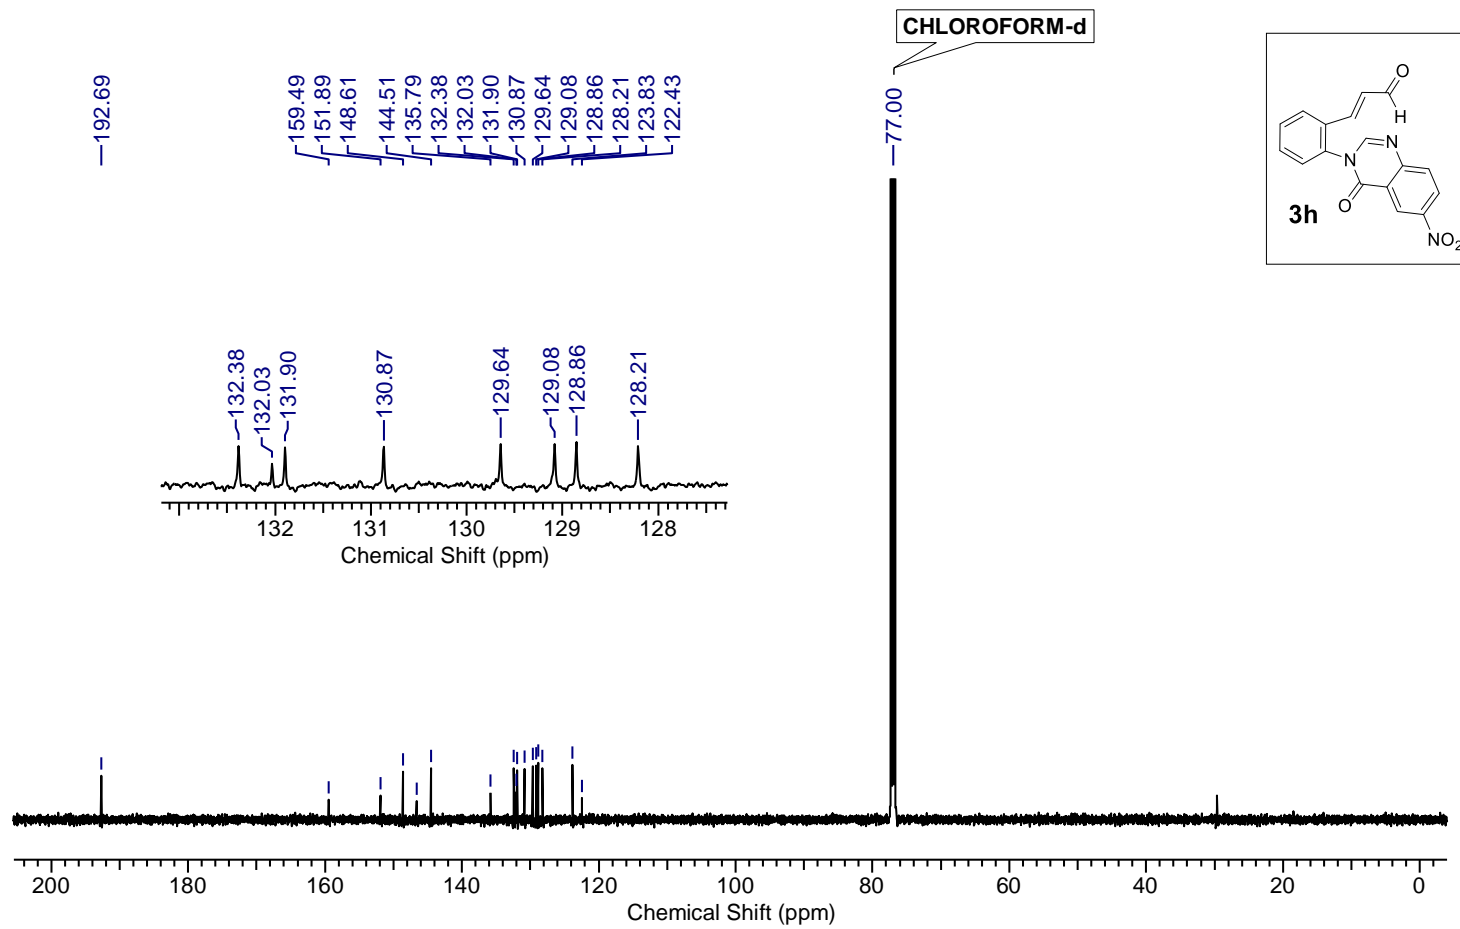

**<sup>1</sup>H NMR (400 MHz, CDCl<sub>3</sub>)**

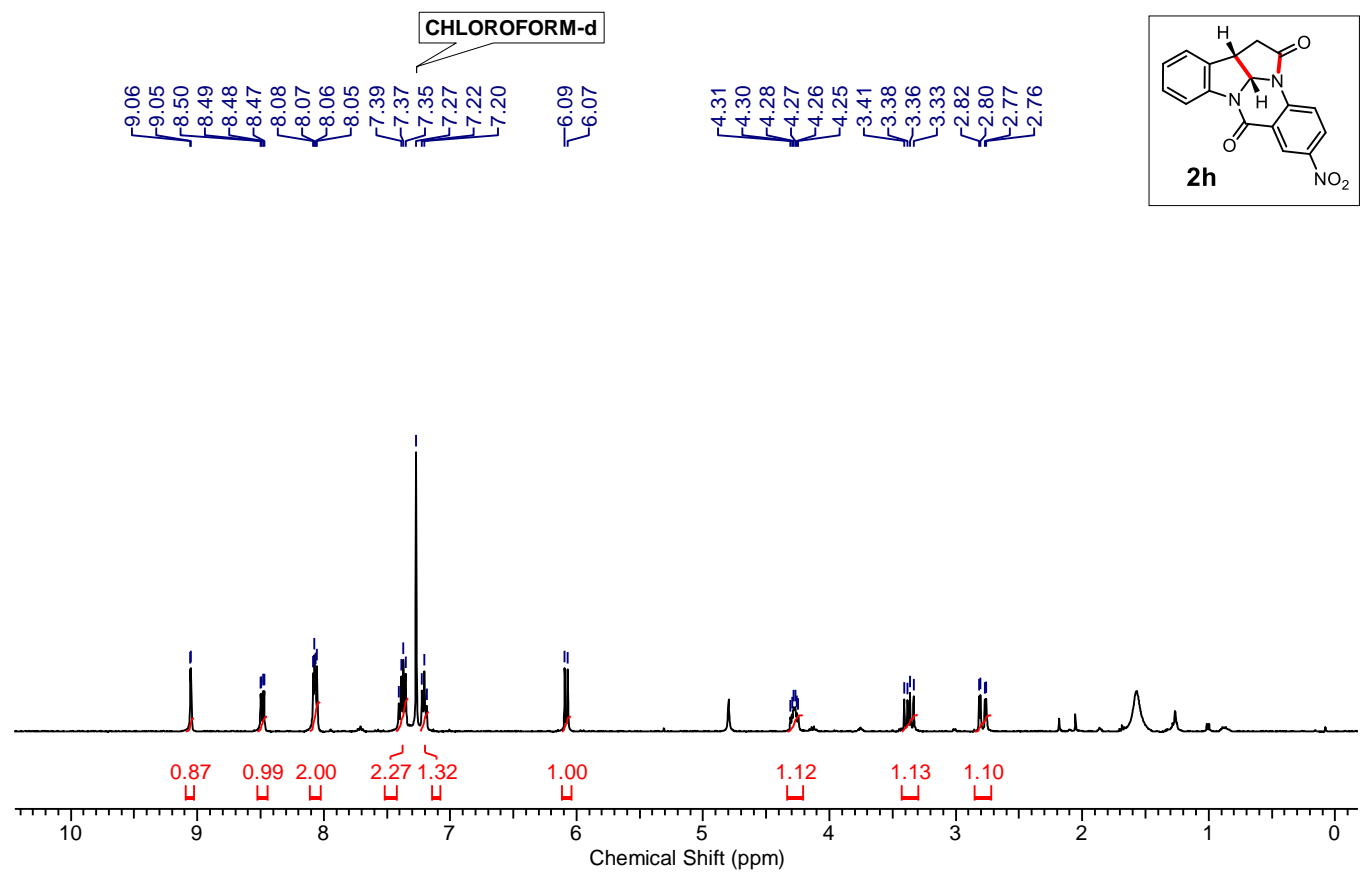

**<sup>13</sup>C NMR (125 MHz, CDCl<sub>3</sub>)**

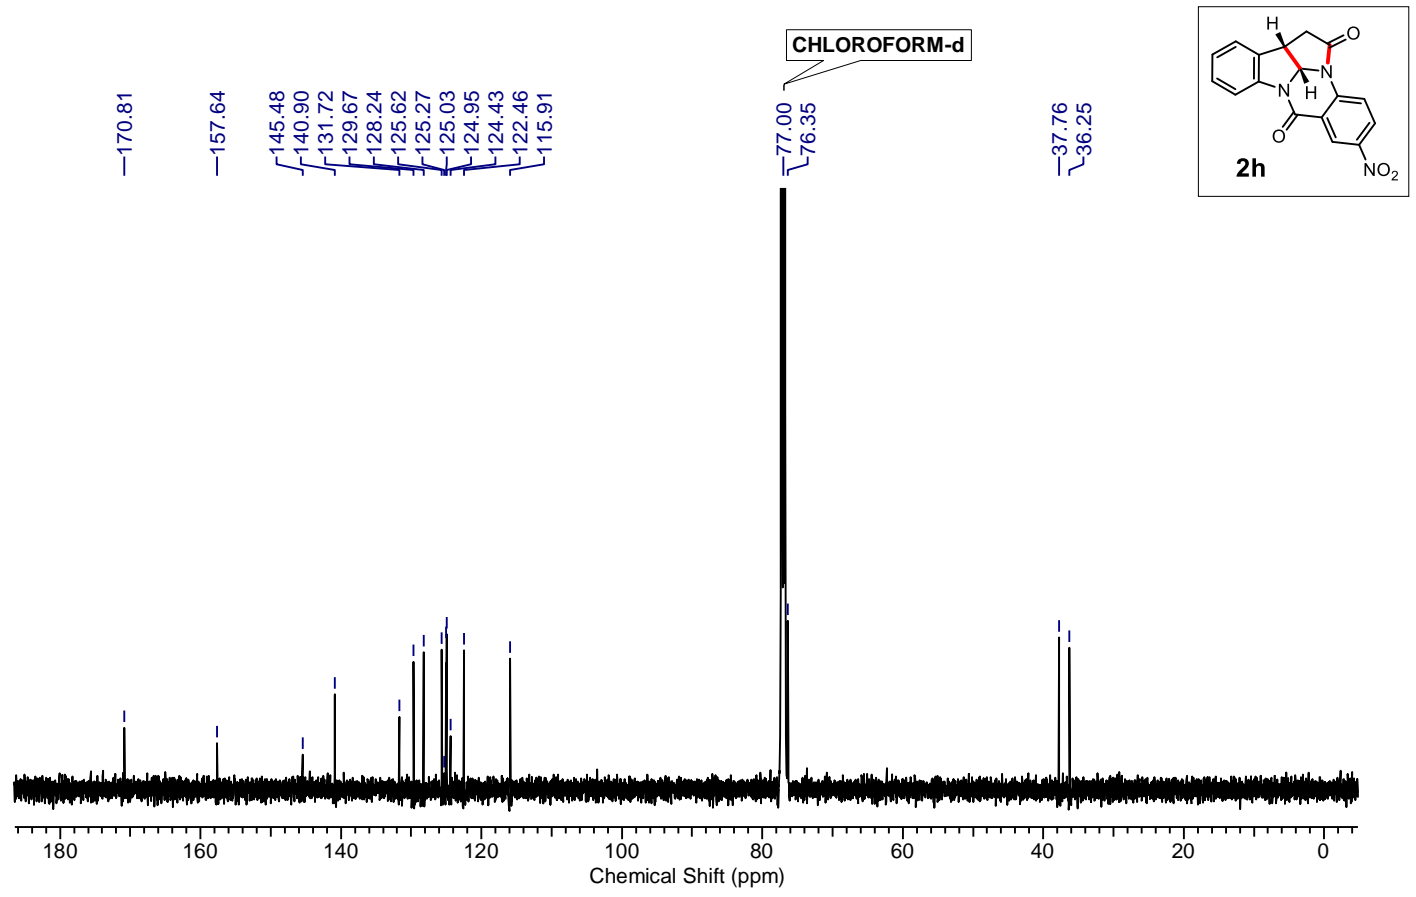

DEPT NMR

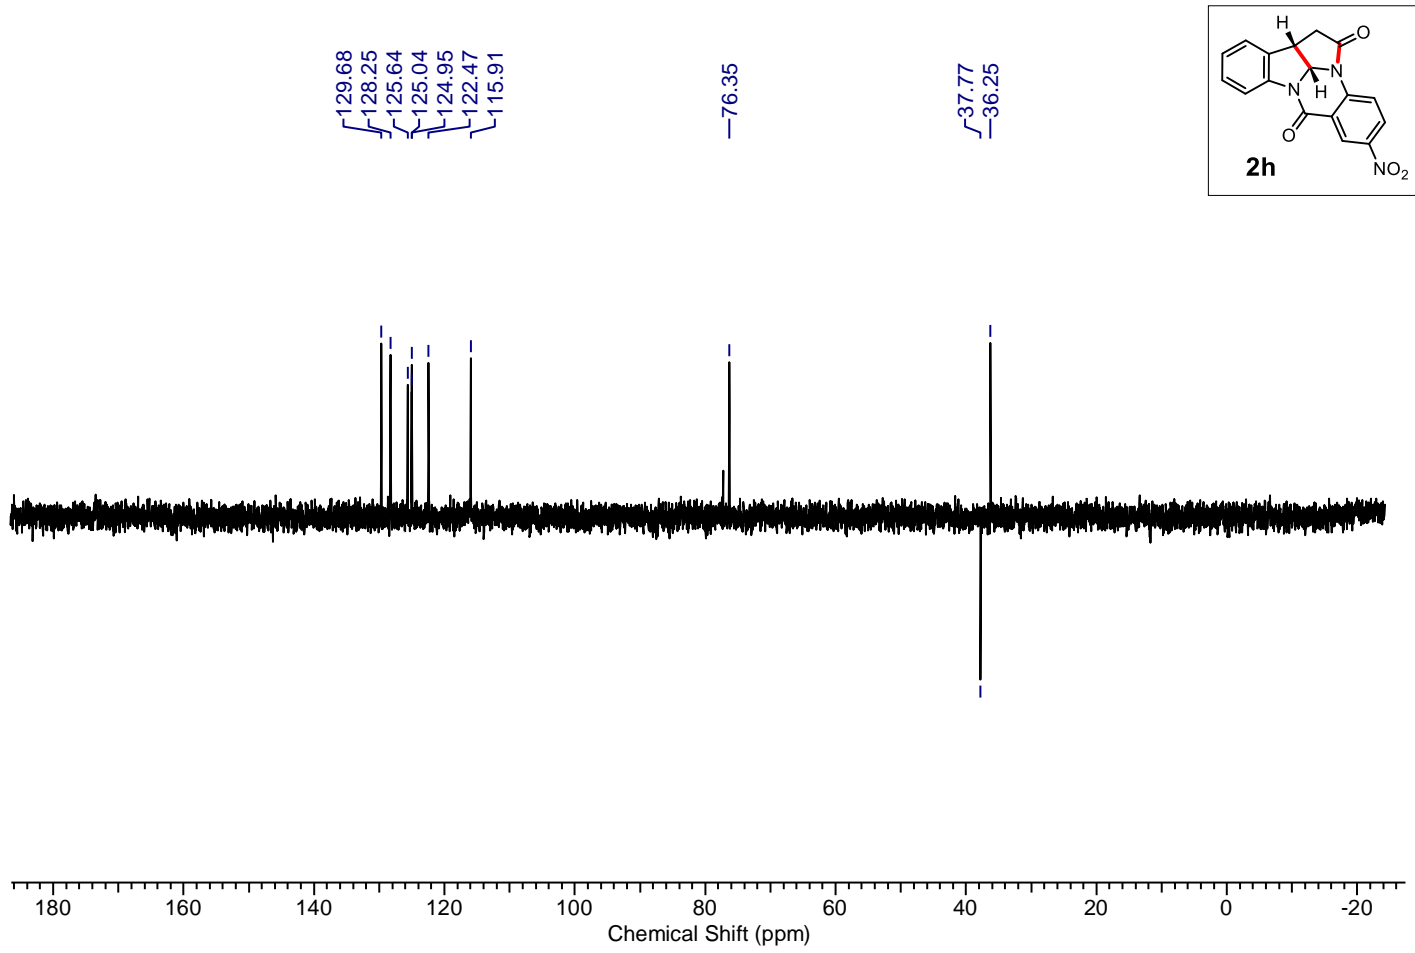

Supplement: c9ob01243e1.pdf [file c9ob01243e1.pdf]
